# Supplementary material for: Brønsted acid-promoted thiazole synthesis under metal-free conditions using sulfur powder as the sulfur source
Source: Royal Society of Chemistry journal article supplement (doi:10.1039/c9ra09656f), 2020-01-01

## Supporting Information

### **Brønsted acid-promoted thiazoles synthesis under metal-free conditions using sulfur powder as the sulfur source**

Penghui Ni,<sup>a</sup> Jing Tan,<sup>a</sup> Rong li,<sup>a</sup> Huawen Huang,<sup>a</sup> Feng Zhang,<sup>b\*</sup> Guo-Jun Deng<sup>a\*</sup>

<sup>a</sup>Key Laboratory for Green Organic Synthesis and Application of Hunan Province, Key Laboratory of Environmentally Friendly Chemistry and Application of Ministry of Education, College of Chemistry, Xiangtan University, Xiangtan 411105, China. E-mail: gjdeng@xtu.edu.cn.

<sup>b</sup>College of Science, Hunan Agricultural University, Changsha, 410128, China. E-mail: zhangf@iccas.ac.cn.

#### Table of Contents

|                                                                                                  |           |
|--------------------------------------------------------------------------------------------------|-----------|
| <b>1. General information</b>                                                                    | <b>2</b>  |
| <b>2. General procedure for synthesis of 3aa</b>                                                 | <b>2</b>  |
| <b>3. Procedure for gram-scale reaction</b>                                                      | <b>2</b>  |
| <b>4. Characterization data of products</b>                                                      | <b>3</b>  |
| <b>5. References</b>                                                                             | <b>24</b> |
| <b>6. Copies of <sup>1</sup>H, <sup>13</sup>C and <sup>19</sup>F NMR spectra of all products</b> | <b>25</b> |

## 1. General information

All reactions were carried out under an atmosphere of air unless otherwise noted. Column chromatography was performed using silica gel (neutral) (200-300 mesh).  $^1\text{H}$ ,  $^{13}\text{C}$  and  $^{19}\text{F}$  NMR spectra were recorded on Bruker-AV (400, 100 and 376 MHz, respectively) instrument internally referenced to tetramethylsilane (TMS) or chloroform signals. Mass spectra were measured on Agilent 5975 GC-MS instrument (EI). High-resolution mass spectra were recorded at Keecloud (Shanghai) Biotechnology co. LTD. HRMS was conducted using electrospraying ionization (ESI) and was performed on a Thermo Scientific LTQ Orbitrap XL. The structures of known compounds were further corroborated by comparing their  $^1\text{H}$ ,  $^{13}\text{C}$ ,  $^{19}\text{F}$  NMR data and MS data with those of literature. All reagents were obtained from commercial suppliers and used without further purification. The molecular weight of **S** is determined to be 32 g/mol unless otherwise noted.

## 2. General procedure for synthesis of **3aa**

Isonicotinic acid (24.6 mg, 0.2 mmol) and sulfur powder (12.8 mg, 0.4 mmol) were added to an oven-dried reaction vessel (20 mL). The reaction vessel was sealed, acetophenone (**1a**, 24.0  $\mu\text{L}$ , 0.2 mmol), benzylamine (**2a**, 44.0  $\mu\text{L}$ , 0.4 mmol) and dimethyl sulfoxide (0.6 mL) were added by syringe. The reaction vessel was stirred at 130  $^{\circ}\text{C}$  for 8 h under air atmosphere. After cooling to room temperature, the reaction was diluted with ethyl acetate (20 mL) and washed with saturated salt water. The organic layer was separated, and the aqueous layer was extracted with ethyl acetate for three times. The combined organic layer was dried over sodium sulfate and the volatiles were removed under reduced pressure. The residue was purified by column chromatography on silica gel (petroleum ether/EtOAc = 400:1) to yield the desired product **3aa** as white solid (29.9 mg, 63% yield), mp 96-97  $^{\circ}\text{C}$ ,  $R_f$  = 0.70 (100:1 petroleum ether/EtOAc).

## 3. Procedure for gram-scale reaction

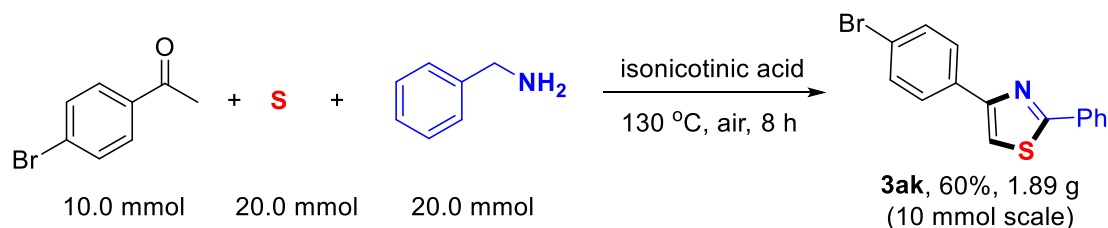

Isonicotinic acid (2.5 g, 20 mmol), 4'-bromoacetophenone (2.0 g, 10 mmol) and sulfur powder

(0.64 g, 20 mmol) were added to a round bottomed flask (50 mL). Benzylamine (2.2 mL, 20 mmol) and dimethyl sulfoxide (15 mL) were added by measuring cylinder. The reaction vessel was stirred at 130 °C for 8 h under air atmosphere. After cooling to room temperature, the reaction was diluted with ethyl acetate (25 mL) and washed with saturated salt water. The organic layer was separated, and the aqueous layer was extracted with ethyl acetate for three times. The combined organic layer was dried over sodium sulfate and the volatiles were removed under reduced pressure. The residue was purified by column chromatography on silica gel (petroleum ether/EtOAc = 400:1) to yield the desired product **3ak** as white solid (1.89 g, 60% yield), mp 126-128 °C.  $R_f$  = 0.60 (100:1 petroleum ether/EtOAc).

#### 4. Characterization data of products

##### 2,4-Diphenylthiazole (**3aa**, CAS: 1826-14-8)<sup>[1]</sup>

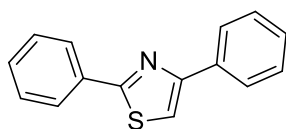

<sup>1</sup>H NMR (400 MHz, CDCl<sub>3</sub>, ppm)  $\delta$  8.03 (dd,  $J$  = 7.8, 1.6 Hz, 2H), 8.02 – 7.98 (m, 2H), 7.47 – 7.41 (m, 6H), 7.36 – 7.32 (m, 1H); <sup>13</sup>C NMR (100 MHz, ppm)  $\delta$  167.8, 156.2, 134.5, 133.7, 130.0, 128.9, 128.7, 128.1, 126.6, 126.4, 112.6.

##### 2-Phenyl-4-(*p*-tolyl)thiazole (**3ab**, CAS: 2362-58-5)<sup>[1]</sup>

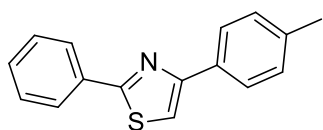

The reaction was conducted with 4'-methylacetophenone (**1b**, 27.0  $\mu$ L, 0.2 mmol), benzylamine (**2a**, 44.0  $\mu$ L, 0.4 mmol), isonicotinic acid (24.6 mg, 0.2 mmol) and sulfur powder (12.8 mg, 0.4 mmol). The residue was purified by column chromatography on silica gel (petroleum ether/EtOAc = 400:1) to yield the desired product **3ab** as white solid (30.1 mg, 60% yield), mp 109-110 °C.  $R_f$  = 0.70 (100:1 petroleum ether/EtOAc).

<sup>1</sup>H NMR (400 MHz, CDCl<sub>3</sub>, ppm)  $\delta$  8.06 – 8.03 (m, 2H), 7.89 (d,  $J$  = 8.2 Hz, 2H), 7.46 – 7.42 (m, 4H), 7.26 – 7.24 (m, 2H), 2.40 (s, 3H); <sup>13</sup>C NMR (100 MHz, ppm)  $\delta$  167.8, 156.3, 138.0, 133.7, 131.7, 130.0, 129.4, 128.9, 126.6, 126.4, 111.9, 21.3.

#### 4-(4-Isobutylphenyl)-2-phenylthiazole (**3ac**)

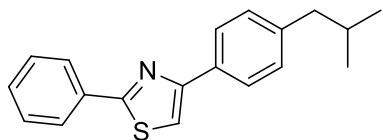

The reaction was conducted with 4'-(2-methylpropyl)acetophenone (**2c**, 38.0  $\mu$ L, 0.2 mmol), benzylamine (**2a**, 44.0  $\mu$ L, 0.4 mmol), isonicotinic acid (24.6 mg, 0.2 mmol) and sulfur powder (12.8 mg, 0.4 mmol). The residue was purified by column chromatography on silica gel (petroleum ether/EtOAc = 300:1) to yield the desired product **3ac** as white solid (29.9 mg, 51% yield), mp 91-92 °C.  $R_f$  = 0.80 (100:1 petroleum ether/EtOAc).

$^1\text{H}$  NMR (400 MHz,  $\text{CDCl}_3$ , ppm)  $\delta$  8.04 (dd,  $J$  = 7.8, 1.6 Hz, 2H), 7.90 (d,  $J$  = 8.2 Hz, 2H), 7.47 – 7.40 (m, 4H), 7.23 – 7.20 (m, 2H), 2.51 (d,  $J$  = 7.2 Hz, 2H), 1.94 – 1.84 (m, 1H), 0.92 (d,  $J$  = 6.6 Hz, 6H);  $^{13}\text{C}$  NMR (100 MHz,  $\text{CDCl}_3$ , ppm)  $\delta$  167.7, 156.4, 141.8, 133.7, 132.0, 129.9, 129.5, 128.9, 126.6, 126.2, 111.9, 45.2, 30.2, 22.3; HRMS (ESI)  $m/z$  calcd. for  $\text{C}_{19}\text{H}_{20}\text{NS}^+$  ( $\text{M}+\text{H}$ ) $^+$  294.1311, found 294.1313.

#### 4-(4-(*tert*-Butyl)phenyl)-2-phenylthiazole (**3ad**)<sup>[2]</sup>

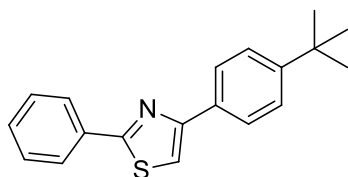

The reaction was conducted with 4'-*tert*-butylacetophenone (**2d**, 37.0  $\mu$ L, 0.2 mmol), benzylamine (**2a**, 44.0  $\mu$ L, 0.4 mmol), isonicotinic acid (24.6 mg, 0.2 mmol) and sulfur powder (12.8 mg, 0.4 mmol). The residue was purified by column chromatography on silica gel (petroleum ether/EtOAc = 300:1) to yield the desired product **3ad** as yellow solid (37.5 mg, 64% yield), mp 93-95 °C.  $R_f$  = 0.80 (100:1 petroleum ether/EtOAc).

$^1\text{H}$  NMR (400 MHz,  $\text{CDCl}_3$ , ppm)  $\delta$  8.05 – 8.02 (m, 2H), 7.91 (d,  $J$  = 8.4 Hz, 2H), 7.47 – 7.41 (m, 5H), 7.40 (s, 1H), 1.35 (s, 9H);  $^{13}\text{C}$  NMR (100 MHz,  $\text{CDCl}_3$ , ppm)  $\delta$  167.7, 156.3, 151.2, 133.8, 131.8, 129.9, 128.9, 126.6, 126.2, 125.6, 112.0, 34.6, 31.3.

**4-([1,1'-Biphenyl]-4-yl)-2-phenylthiazole (3ae, CAS: 13355-29-8)<sup>[2]</sup>**

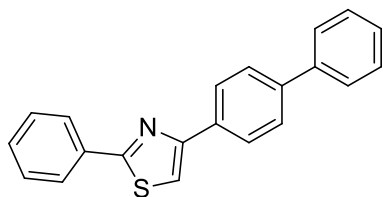

The reaction was conducted with 4-acetylbiphenyl (**2e**, 40.0 mg, 0.2 mmol), benzylamine (**2a**, 44.0  $\mu$ L, 0.4 mmol), isonicotinic acid (24.6 mg, 0.2 mmol) and sulfur powder (12.8 mg, 0.4 mmol). The residue was purified by column chromatography on silica gel (petroleum ether/EtOAc = 300:1) to yield the desired product **3ae** as yellow solid (35.1 mg, 56% yield), mp 158-160 °C.  $R_f$  = 0.70 (100:1 petroleum ether/EtOAc).

$^1\text{H}$  NMR (400 MHz,  $\text{CDCl}_3$ , ppm)  $\delta$  8.07 – 8.05 (m, 4H), 7.69 – 7.64 (m, 4H), 7.49 – 7.43 (m, 6H), 7.37 – 7.34 (m, 1H);  $^{13}\text{C}$  NMR (100 MHz,  $\text{CDCl}_3$ , ppm)  $\delta$  167.9, 155.9, 140.8, 140.7, 133.7, 133.5, 130.1, 128.9, 128.8, 127.4, 127.0, 126.8, 126.6, 112.6.

**4-(4-Methoxyphenyl)-2-phenylthiazole (3af, CAS: 2362-68-7)<sup>[3]</sup>**

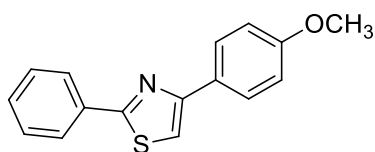

The reaction was conducted with 4'-methoxyacetophenone (**2f**, 30.0 mg, 0.2 mmol), benzylamine (**2a**, 44.0  $\mu$ L, 0.4 mmol), isonicotinic acid (24.6 mg, 0.2 mmol) and sulfur powder (12.8 mg, 0.4 mmol). The residue was purified by column chromatography on silica gel (petroleum ether/EtOAc = 30:1) to yield the desired product **3af** as yellow solid (25.6 mg, 48% yield), mp 118-120 °C.  $R_f$  = 0.60 (10:1 petroleum ether/EtOAc).

$^1\text{H}$  NMR (400 MHz,  $\text{CDCl}_3$ , ppm)  $\delta$  8.06 – 8.00 (m, 2H), 7.92 (d,  $J$  = 8.6 Hz, 2H), 7.51 – 7.40 (m, 3H), 7.32 (s, 1H), 6.96 (d,  $J$  = 8.7 Hz, 2H), 3.84 (s, 3H);  $^{13}\text{C}$  NMR (100 MHz,  $\text{CDCl}_3$ , ppm)  $\delta$  167.7, 159.6, 156.0, 133.8, 129.9, 128.9, 127.7, 127.5, 126.5, 114.0, 110.9, 55.3.

**2-Phenyl-4-(4-(trifluoromethoxy)phenyl)thiazole (3ag)**

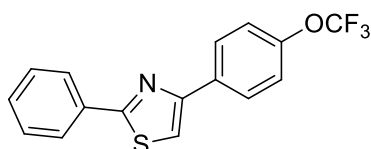

The reaction was conducted with 4'-(trifluoromethoxy)acetophenone (**2g**, 33.0  $\mu$ L, 0.2 mmol), benzylamine (**2a**, 44.0  $\mu$ L, 0.4 mmol), isonicotinic acid (24.6 mg, 0.2 mmol) and sulfur powder (12.8 mg, 0.4 mmol). The residue was purified by column chromatography on silica gel (petroleum ether/EtOAc = 200:1) to yield the desired product **3ag** as white solid (44.9 mg, 70% yield), mp 100-101 °C.  $R_f$  = 0.60 (100:1 petroleum ether/EtOAc).

$^1\text{H}$  NMR (400 MHz,  $\text{CDCl}_3$ , ppm)  $\delta$  8.03 – 7.98 (m, 4H), 7.47 – 7.43 (m, 4H), 7.27 (d,  $J$  = 8.2 Hz, 2H);  $^{13}\text{C}$  NMR (100 MHz,  $\text{CDCl}_3$ , ppm)  $\delta$  168.2, 154.8, 149.0, 133.5, 133.2, 130.2, 128.9, 127.8, 126.6, 121.2, 120.5 (q,  $J$  = 257.0 Hz), 113.1;  $^{19}\text{F}$  NMR (376 MHz,  $\text{CDCl}_3$ , ppm)  $\delta$  -57.6; HRMS (ESI)  $m/z$  calcd. for  $\text{C}_{16}\text{H}_{11}\text{F}_3\text{NOS}^+$  ( $\text{M}+\text{H}$ ) $^+$  322.0508, found 322.0510.

#### Methyl-4-(2-phenylthiazol-4-yl)benzoate (**3ah**)<sup>[3]</sup>

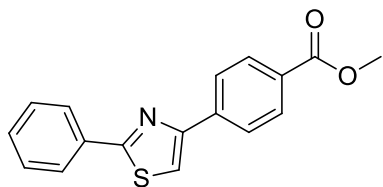

The reaction was conducted with methyl 4-acetylbenzoate (**2h**, 36.0 mg, 0.2 mmol), benzylamine (**2a**, 44.0  $\mu$ L, 0.4 mmol), isonicotinic acid (24.6 mg, 0.2 mmol) and sulfur powder (12.8 mg, 0.4 mmol). The residue was purified by column chromatography on silica gel (petroleum ether/EtOAc = 20:1) to yield the desired product **3ah** as light yellow solid (44.3 mg, 75% yield), mp 151-152 °C.  $R_f$  = 0.60 (10:1 petroleum ether/EtOAc).

$^1\text{H}$  NMR (400 MHz,  $\text{CDCl}_3$ , ppm)  $\delta$  8.18 – 7.97 (m, 6H), 7.58 (s, 1H), 7.51 – 7.40 (m, 3H), 3.94 (s, 3H);  $^{13}\text{C}$  NMR (100 MHz,  $\text{CDCl}_3$ , ppm)  $\delta$  168.2, 166.8, 155.0, 138.5, 133.4, 130.2, 130.1, 129.4, 128.9, 126.6, 126.2, 114.5, 52.1.

#### 4-(4-Fluorophenyl)-2-phenylthiazole (**3ai**, CAS: 329079-72-3)<sup>[2]</sup>

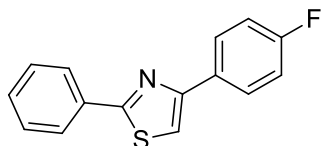

The reaction was conducted with 4'-fluoroacetophenone (**2i**, 24.0  $\mu$ L, 0.2 mmol), benzylamine (**2a**, 44.0  $\mu$ L, 0.4 mmol), isonicotinic acid (24.6 mg, 0.2 mmol) and sulfur powder (12.8 mg, 0.4 mmol). The residue was purified by column chromatography on silica gel (petroleum ether/EtOAc =

300:1) to yield the desired product **3ai** as white solid (30.6 mg, 60% yield), mp 104-105 °C.  $R_f$  = 0.70 (100:1 petroleum ether/EtOAc).

$^1\text{H}$  NMR (400 MHz,  $\text{CDCl}_3$ , ppm)  $\delta$  8.03 – 8.00 (m, 2H), 7.98 – 7.93 (m, 2H), 7.48 – 7.42 (m, 3H), 7.38 (s, 1H), 7.15 – 7.09 (m, 2H);  $^{13}\text{C}$  NMR (100 MHz,  $\text{CDCl}_3$ , ppm)  $\delta$  168.0, 162.7 (d,  $J$  = 247.4 Hz), 155.2, 133.6, 130.7, 130.7 (d,  $J$  = 3.2 Hz), 128.9, 128.1 (d,  $J$  = 8.1 Hz), 126.5, 115.6 (d,  $J$  = 21.7 Hz), 112.2;  $^{19}\text{F}$  NMR (376 MHz,  $\text{CDCl}_3$ , ppm)  $\delta$  -113.7.

#### 4-(4-Chlorophenyl)-2-phenylthiazole (**3aj**, CAS: 122395-24-8)<sup>[2]</sup>

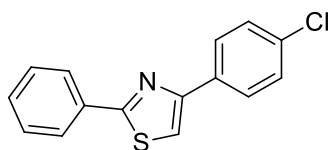

The reaction was conducted with 4'-chloroacetophenone (**2j**, 26.0  $\mu\text{L}$ , 0.2 mmol), benzylamine (**2a**, 44.0  $\mu\text{L}$ , 0.4 mmol), isonicotinic acid (24.6 mg, 0.2 mmol) and sulfur powder (12.8 mg, 0.4 mmol). The residue was purified by column chromatography on silica gel (petroleum ether/EtOAc = 300:1) to yield the desired product **3aj** as white solid (33.6 mg, 62% yield), mp 133-134 °C.  $R_f$  = 0.70 (100:1 petroleum ether/EtOAc).

$^1\text{H}$  NMR (400 MHz,  $\text{CDCl}_3$ , ppm)  $\delta$  8.02 – 8.00 (m, 2H), 7.91 (d,  $J$  = 8.5 Hz, 2H), 7.48 – 7.38 (m, 6H);  $^{13}\text{C}$  NMR (100 MHz,  $\text{CDCl}_3$ , ppm)  $\delta$  168.1, 155.0, 133.9, 133.5, 132.9, 130.2, 128.9, 128.9, 127.7, 126.6, 112.9.

#### 4-(4-Bromophenyl)-2-phenylthiazole (**3ak** CAS: 2362-69-8)<sup>[2]</sup>

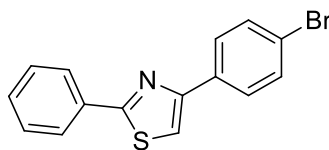

The reaction was conducted with 4'-bromoacetophenone (**2k**, 40.0 mg, 0.2 mmol), benzylamine (**2a**, 44.0  $\mu\text{L}$ , 0.4 mmol), isonicotinic acid (24.6 mg, 0.2 mmol) and sulfur powder (12.8 mg, 0.4 mmol). The residue was purified by column chromatography on silica gel (petroleum ether/EtOAc = 400:1) to yield the desired product **3ak** as white solid (40.9 mg, 65% yield), mp 126-128 °C.  $R_f$  = 0.60 (100:1 petroleum ether/EtOAc).

$^1\text{H}$  NMR (400 MHz,  $\text{CDCl}_3$ , ppm)  $\delta$  8.02 – 8.00 (m, 2H), 7.86 – 7.83 (m, 2H), 7.56 – 7.53 (m, 2H),

7.47 – 7.43 (m, 4H);  $^{13}\text{C}$  NMR (100 MHz,  $\text{CDCl}_3$ , ppm)  $\delta$  168.1, 155.0, 133.45, 133.4, 131.8, 130.2, 128.9, 127.9, 126.6, 122.1, 113.0.

**4-(4-Iodophenyl)-2-phenylthiazole (3al, CAS: 2227-65-8)<sup>[2]</sup>**

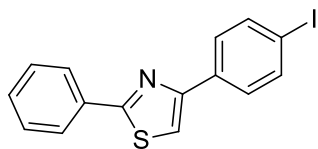

The reaction was conducted with 4'-iodoacetophenone (**2l**, 50.0 mg, 0.2 mmol), benzylamine (**2a**, 44.0  $\mu\text{L}$ , 0.4 mmol), isonicotinic acid (24.6 mg, 0.2 mmol) and sulfur powder (12.8 mg, 0.4 mmol). The residue was purified by column chromatography on silica gel (petroleum ether/EtOAc = 400:1) to yield the desired product **3al** as white solid (37.8 mg, 52% yield), mp 114-116  $^{\circ}\text{C}$ .  $R_f$  = 0.60 (100:1 petroleum ether/EtOAc).

$^1\text{H}$  NMR (400 MHz,  $\text{CDCl}_3$ , ppm)  $\delta$  8.02 – 8.00 (m, 2H), 7.76 – 7.70 (m, 4H), 7.45 – 7.44 (m, 4H);  $^{13}\text{C}$  NMR (100 MHz,  $\text{CDCl}_3$ , ppm)  $\delta$  168.1, 155.1, 137.8, 133.9, 133.5, 130.2, 128.9, 128.1, 126.6, 113.1, 93.8.

**4-(2-Phenylthiazol-4-yl)benzonitrile (3am)<sup>[4]</sup>**

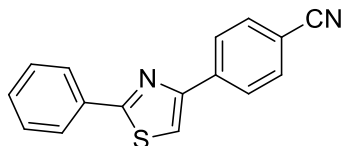

The reaction was conducted with 4'-cyanoacetophenone (**2m**, 29.0 mg, 0.2 mmol), benzylamine (**2a**, 44.0  $\mu\text{L}$ , 0.4 mmol), isonicotinic acid (24.6 mg, 0.2 mmol) and sulfur powder (12.8 mg, 0.4 mmol). The residue was purified by column chromatography on silica gel (petroleum ether/EtOAc = 15:1) to yield the desired product **3am** as yellow solid (36.7 mg, 70% yield), mp 135-137  $^{\circ}\text{C}$ .  $R_f$  = 0.60 (10:1 petroleum ether/EtOAc).

$^1\text{H}$  NMR (400 MHz,  $\text{CDCl}_3$ , ppm)  $\delta$  8.06 (d,  $J$  = 8.4 Hz, 2H), 8.01 – 7.98 (m, 2H), 7.68 (d,  $J$  = 8.4 Hz, 2H), 7.57 (s, 1H), 7.48 – 7.45 (m, 3H);  $^{13}\text{C}$  NMR (100 MHz,  $\text{CDCl}_3$ , ppm)  $\delta$  168.5, 154.0, 138.3, 133.1, 132.5, 130.4, 128.9, 126.7, 126.5, 118.9, 115.3, 111.2.



#### 4-(4-Nitrophenyl)-2-phenylthiazole (**3an**, CAS: 2521-25-7)<sup>[5]</sup>

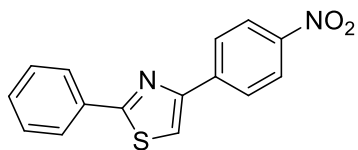

The reaction was conducted with 4'-nitroacetophenone (**2n**, 33.5 mg, 0.2 mmol), benzylamine (**2a**, 44.0  $\mu$ L, 0.4 mmol), isonicotinic acid (24.6 mg, 0.2 mmol) and sulfur powder (12.8 mg, 0.4 mmol). The residue was purified by column chromatography on silica gel (petroleum ether/EtOAc = 10:1) to yield the desired product **3an** as yellow solid (34.4 mg, 61% yield), mp 123-124 °C.  $R_f$  = 0.70 (8:1 petroleum ether/EtOAc).

$^1\text{H}$  NMR (400 MHz,  $\text{CDCl}_3$ , ppm)  $\delta$  8.27 (d,  $J$  = 8.9 Hz, 2H), 8.12 (d,  $J$  = 8.8 Hz, 2H), 8.03 – 8.00 (m, 2H), 7.64 (s, 1H), 7.48 – 7.45 (m, 3H);  $^{13}\text{C}$  NMR (100 MHz,  $\text{CDCl}_3$ , ppm)  $\delta$  168.7, 153.6, 147.1, 140.2, 133.1, 130.5, 129.0, 126.9, 126.6, 124.1, 116.0.

#### 4-(4-(Methylsulfonyl)phenyl)-2-phenylthiazole (**3ao**)

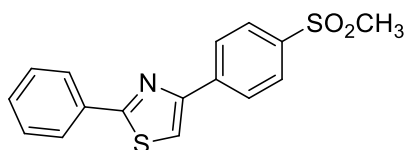

The reaction was conducted with 4'-methylsulphonylacetophenone (**2o**, 40.0 mg, 0.2 mmol), benzylamine (**2a**, 44.0  $\mu$ L, 0.4 mmol), isonicotinic acid (24.6 mg, 0.2 mmol) and sulfur powder (12.8 mg, 0.4 mmol). The residue was purified by column chromatography on silica gel (petroleum ether/EtOAc = 5:1) to yield the desired product **3ao** as red solid (42.8 mg, 68% yield), mp 192-193 °C.  $R_f$  = 0.50 (3:1 petroleum ether/EtOAc).

$^1\text{H}$  NMR (400 MHz,  $\text{CDCl}_3$ , ppm)  $\delta$  8.19 (d,  $J$  = 8.4 Hz, 2H), 8.05 – 8.00 (m, 4H), 7.65 (s, 1H), 7.49 – 7.47 (m, 3H), 3.09 (s, 3H);  $^{13}\text{C}$  NMR (100 MHz,  $\text{CDCl}_3$ , ppm)  $\delta$  168.6, 154.0, 139.5, 139.4, 133.2, 130.4, 129.0, 127.9, 127.1, 126.6, 115.5, 44.6; HRMS (ESI)  $m/z$  calcd. for  $\text{C}_{16}\text{H}_{14}\text{NO}_2\text{S}_2^+$  ( $\text{M}+\text{H}$ ) $^+$  316.0461, found 316.0465.

#### 2-Phenyl-4-(*m*-tolyl)thiazole (**3ap**)

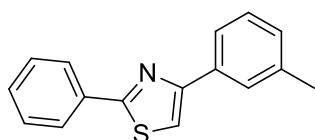

The reaction was conducted with 3'-methylacetophenone (**2p**, 26.0  $\mu$ L, 0.2 mmol), benzylamine (**2a**, 44.0  $\mu$ L, 0.4 mmol), isonicotinic acid (24.6 mg, 0.2 mmol) and sulfur powder (12.8 mg, 0.4 mmol). The residue was purified by column chromatography on silica gel (petroleum ether/EtOAc = 400:1) to yield the desired product **3ap** as colourless oily liquid (31.6 mg, 63% yield).  $R_f$  = 0.80 (100:1 petroleum ether/EtOAc).

$^1\text{H}$  NMR (400 MHz,  $\text{CDCl}_3$ , ppm)  $\delta$  8.04 (dd,  $J$  = 8.0, 1.6 Hz, 2H), 7.83 (s, 1H), 7.76 (d,  $J$  = 7.8 Hz, 1H), 7.47 – 7.41 (m, 4H), 7.32 (t,  $J$  = 7.6 Hz, 1H), 7.16 (d,  $J$  = 7.6 Hz, 1H), 2.42 (s, 3H);  $^{13}\text{C}$  NMR (100 MHz,  $\text{CDCl}_3$ , ppm)  $\delta$  167.8, 156.4, 138.3, 134.4, 133.7, 130.0, 128.9, 128.9, 128.6, 127.2, 126.6, 123.5, 112.5, 21.5; HRMS (ESI)  $m/z$  calcd. for  $\text{C}_{16}\text{H}_{14}\text{NS}^+$  ( $\text{M}+\text{H}$ ) $^+$  252.0842, found 252.0843.

### 2-Phenyl-4-(3-(trifluoromethyl)phenyl)thiazole (**3aq**)

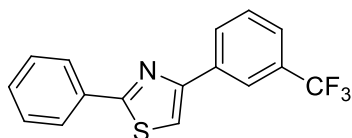

The reaction was conducted with 3'-(trifluoromethyl)acetophenone (**2q**, 30.0  $\mu$ L, 0.2 mmol), benzylamine (**2a**, 44.0  $\mu$ L, 0.4 mmol), isonicotinic acid (24.6 mg, 0.2 mmol) and sulfur powder (12.8 mg, 0.4 mmol). The residue was purified by column chromatography on silica gel (petroleum ether/EtOAc = 400:1) to yield the desired product **3aq** as white solid (40.9 mg, 67% yield), mp 112-114  $^{\circ}\text{C}$ .  $R_f$  = 0.70 (100:1 petroleum ether/EtOAc).

$^1\text{H}$  NMR (400 MHz,  $\text{CDCl}_3$ , ppm)  $\delta$  8.26 (s, 1H), 8.13 (d,  $J$  = 7.6 Hz, 1H), 8.04 – 8.02 (m, 2H), 7.59 (d,  $J$  = 7.8 Hz, 1H), 7.54 (d,  $J$  = 7.7 Hz, 1H), 7.51 (s, 1H), 7.48 – 7.43 (m, 3H);  $^{13}\text{C}$  NMR (100 MHz,  $\text{CDCl}_3$ , ppm)  $\delta$  168.3, 154.6, 135.1, 133.4, 131.1 (q,  $J$  = 32.3 Hz), 130.3, 129.5, 129.2, 129.0, 126.6, 124.6 (q,  $J$  = 3.7 Hz), 124.1 (q,  $J$  = 270.8 Hz), 123.2 (q,  $J$  = 3.8 Hz), 113.8;  $^{19}\text{F}$  NMR (376 MHz,  $\text{CDCl}_3$ , ppm)  $\delta$  -62.6; HRMS calcd. for  $\text{C}_{16}\text{H}_{11}\text{F}_3\text{NS}^+$  ( $\text{M}+\text{H}$ ) $^+$  306.0559, found 306.0558.

#### 4-(3-Fluorophenyl)-2-phenylthiazole (3ar)

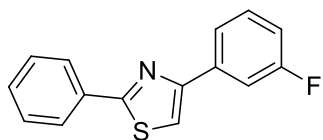

The reaction was conducted with 3'-fluoroacetophenone (**2r**, 24.0  $\mu$ L, 0.2 mmol), benzylamine (**2a**, 44.0  $\mu$ L, 0.4 mmol), isonicotinic acid (24.6 mg, 0.2 mmol) and sulfur powder (12.8 mg, 0.4 mmol). The residue was purified by column chromatography on silica gel (petroleum ether/EtOAc = 400:1) to yield the desired product **3ar** as white solid (37.7 mg, 74% yield), mp 85-86 °C.  $R_f$  = 0.80 (100:1 petroleum ether/EtOAc).

$^1\text{H}$  NMR (400 MHz,  $\text{CDCl}_3$ , ppm)  $\delta$  8.03 – 8.01 (m, 2H), 7.74 – 7.71 (m, 2H), 7.47 – 7.41 (m, 4H), 7.39 – 7.35 (m, 1H), 7.06 – 7.01 (m, 1H);  $^{13}\text{C}$  NMR (100 MHz,  $\text{CDCl}_3$ , ppm)  $\delta$  168.0, 163.2 (d,  $J$  = 245.1 Hz), 154.9, 136.6 (d,  $J$  = 8.2 Hz), 133.5, 130.2 (d,  $J$  = 8.2 Hz), 130.1, 128.9, 126.6, 121.9 (d,  $J$  = 2.8 Hz), 114.9 (d,  $J$  = 21.3 Hz), 113.5, 113.4 (d,  $J$  = 23.0 Hz);  $^{19}\text{F}$  NMR (376 MHz,  $\text{CDCl}_3$ , ppm)  $\delta$  -113.0; HRMS (ESI)  $m/z$  calcd. for  $\text{C}_{15}\text{H}_{11}\text{FNS}^+$  ( $\text{M}+\text{H}$ ) $^+$  256.0591, found 256.0590.

#### 4-(3-Chlorophenyl)-2-phenylthiazole (3as)

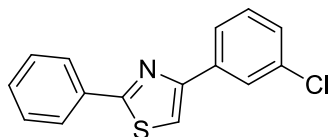

The reaction was conducted with 3'-chloroacetophenone (**2s**, 26.0  $\mu$ L, 0.2 mmol), benzylamine (**2a**, 44.0  $\mu$ L, 0.4 mmol), isonicotinic acid (24.6 mg, 0.2 mmol) and sulfur powder (12.8 mg, 0.4 mmol). The residue was purified by column chromatography on silica gel (petroleum ether/EtOAc = 400:1) to yield the desired product **3as** as white solid (35.2 mg, 65% yield), mp 80-81 °C.  $R_f$  = 0.80 (100:1 petroleum ether/EtOAc).

$^1\text{H}$  NMR (400 MHz,  $\text{CDCl}_3$ , ppm)  $\delta$  8.03 – 8.00 (m, 3H), 7.83 (d,  $J$  = 7.4 Hz, 1H), 7.48 – 7.41 (m, 4H), 7.37 – 7.29 (m, 2H);  $^{13}\text{C}$  NMR (100 MHz,  $\text{CDCl}_3$ , ppm)  $\delta$  168.1, 154.7, 136.1, 134.7, 133.5, 130.2, 129.9, 128.9, 128.1, 126.6, 124.4, 113.5; HRMS (ESI)  $m/z$  calcd. for  $\text{C}_{15}\text{H}_{11}\text{ClNS}^+$  ( $\text{M}+\text{H}$ ) $^+$  272.0295, found 272.0300.

#### 4-(3-Bromophenyl)-2-phenylthiazole (**3at**, CAS: 2362-60-9)

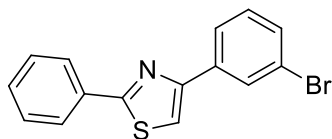

The reaction was conducted with 3'-bromoacetophenone (**3t**, 27.0  $\mu$ L, 0.2 mmol), benzylamine (**2a**, 44.0  $\mu$ L, 0.4 mmol), isonicotinic acid (24.6 mg, 0.2 mmol) and sulfur powder (12.8 mg, 0.4 mmol). The residue was purified by column chromatography on silica gel (petroleum ether/EtOAc = 300:1) to yield the desired product **3at** as white solid (42.2 mg, 67% yield), mp 97-98 °C.  $R_f$  = 0.70 (100:1 petroleum ether/EtOAc).

$^1\text{H}$  NMR (400 MHz,  $\text{CDCl}_3$ , ppm)  $\delta$  8.15 (s, 1H), 8.02 – 7.99 (m, 2H), 7.86 (d,  $J$  = 7.8 Hz, 1H), 7.45 – 7.42 (m, 5H), 7.27 (t,  $J$  = 7.9 Hz, 1H);  $^{13}\text{C}$  NMR (100 MHz,  $\text{CDCl}_3$ , ppm)  $\delta$  168.1, 154.5, 136.3, 133.4, 131.0, 130.2, 129.4, 128.9, 126.5, 124.8, 122.9, 113.5; HRMS (ESI)  $m/z$  calcd. for  $\text{C}_{15}\text{H}_{11}\text{BrNS}^+$  ( $\text{M}+\text{H}$ ) $^+$  315.9790, found 315.9798.

#### 4-(3-Nitrophenyl)-2-phenylthiazole (**3au**, CAS: 2521-26-8)

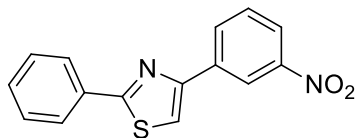

The reaction was conducted with 3'-nitroacetophenone (**2u**, 33.5 mg, 0.2 mmol), benzylamine (**2a**, 44.0  $\mu$ L, 0.4 mmol), isonicotinic acid (24.6 mg, 0.2 mmol) and sulfur powder (12.8 mg, 0.4 mmol). The residue was purified by column chromatography on silica gel (petroleum ether/EtOAc = 10:1) to yield the desired product **3au** as yellow solid (33.8 mg, 60% yield), mp 143-145 °C.  $R_f$  = 0.60 (5:1 petroleum ether/EtOAc).

$^1\text{H}$  NMR (400 MHz,  $\text{CDCl}_3$ , ppm)  $\delta$  8.80 (s, 1H), 8.30 (d,  $J$  = 7.8 Hz, 1H), 8.18 – 8.16 (m, 1H), 8.04 – 8.01 (m, 2H), 7.60 – 7.56 (m, 2H), 7.49 – 7.46 (m, 3H);  $^{13}\text{C}$  NMR (100 MHz,  $\text{CDCl}_3$ , ppm)  $\delta$  168.6, 153.6, 148.7, 136.0, 133.2, 132.1, 130.4, 129.6, 129.0, 126.6, 122.6, 121.2, 114.5; HRMS (ESI)  $m/z$  calcd for  $\text{C}_{15}\text{H}_{11}\text{N}_2\text{O}_2\text{S}^+$  ( $\text{M}+\text{H}$ ) $^+$  283.0536, found 283.0541.

#### 4-(2-Fluorophenyl)-2-phenylthiazole (3av)

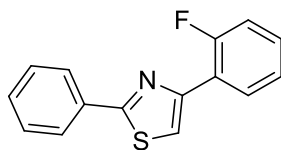

The reaction was conducted with 2'-fluoroacetophenone (**2v**, 25.0  $\mu$ L, 0.2 mmol), benzylamine (**2a**, 44.0  $\mu$ L, 0.4 mmol), isonicotinic acid (24.6 mg, 0.2 mmol) and sulfur powder (12.8 mg, 0.4 mmol). The residue was purified by column chromatography on silica gel (petroleum ether/EtOAc = 400:1) to yield the desired product **3av** as white solid (28.1 mg, 55% yield), mp 67-68 °C.  $R_f$  = 0.60 (100:1 petroleum ether/EtOAc).

$^1\text{H}$  NMR (400 MHz,  $\text{CDCl}_3$ , ppm)  $\delta$  8.40 – 8.36 (m, 1H), 8.05 – 8.02 (m, 2H), 7.75 (d,  $J$  = 2.2 Hz, 1H), 7.48 – 7.42 (m, 3H), 7.30 – 7.23 (m, 2H), 7.17 – 7.12 (m, 1H);  $^{13}\text{C}$  NMR (100 MHz,  $\text{CDCl}_3$ , ppm)  $\delta$  166.7, 160.3 (d,  $J$  = 249.8 Hz), 149.7, 133.5, 130.2 (d,  $J$  = 3.2 Hz), 130.1, 129.2 (d,  $J$  = 8.7 Hz), 128.9, 126.6, 124.4 (d,  $J$  = 3.4 Hz), 122.2 (d,  $J$  = 11.3 Hz), 117.4 (d,  $J$  = 15.1 Hz), 115.9 (d,  $J$  = 22.5 Hz);  $^{19}\text{F}$  NMR (376 MHz,  $\text{CDCl}_3$ , ppm)  $\delta$  -114.6; HRMS (ESI)  $m/z$  calcd. for  $\text{C}_{15}\text{H}_{11}\text{FNS}^+$  ( $\text{M}+\text{H}$ ) $^+$  256.0591, found 256.0596.

#### 4-(2-Chlorophenyl)-2-phenylthiazole (3aw)

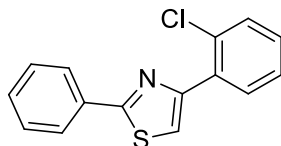

The reaction was conducted with 2'-chloroacetophenone (**2w**, 26.0  $\mu$ L, 0.2 mmol), benzylamine (**2a**, 44.0  $\mu$ L, 0.4 mmol), isonicotinic acid (24.6 mg, 0.2 mmol) and sulfur powder (12.8 mg, 0.4 mmol). The residue was purified by column chromatography on silica gel (petroleum ether/EtOAc = 400 :1) to yield the desired product **3aw** as white solid (28.7 mg, 53% yield), mp 71-72 °C.  $R_f$  = 0.70 (100:1 petroleum ether/EtOAc).

$^1\text{H}$  NMR (400 MHz,  $\text{CDCl}_3$ , ppm)  $\delta$  8.08 (dd,  $J$  = 7.8, 1.7 Hz, 1H), 8.03 – 8.01 (m, 2H), 7.83 (s, 1H), 7.49 – 7.42 (m, 4H), 7.38 – 7.34 (m, 1H), 7.30 – 7.26 (m, 1H);  $^{13}\text{C}$  NMR (100 MHz,  $\text{CDCl}_3$ , ppm)  $\delta$  166.7, 152.5, 133.5, 133.1, 132.0, 131.6, 130.4, 130.1, 129.0, 128.9, 126.9, 126.6, 117.9; HRMS (ESI)  $m/z$  calcd. for  $\text{C}_{15}\text{H}_{11}\text{ClNS}^+$  ( $\text{M}+\text{H}$ ) $^+$  272.0295, found 272.0300.

#### 4-(2,5-Dichlorophenyl)-2-phenylthiazole (**3ax**)

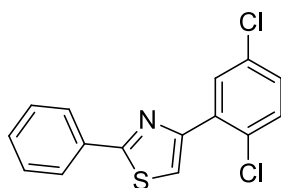

The reaction was conducted with 2',5'-dichloroacetophenone (**2x**, 29.0  $\mu$ L, 0.2 mmol), benzylamine (**2a**, 44.0  $\mu$ L, 0.4 mmol), isonicotinic acid (24.6 mg, 0.2 mmol) and sulfur powder (12.8 mg, 0.4 mmol). The residue was purified by column chromatography on silica gel (petroleum ether/EtOAc = 400 :1) to yield the desired product **3ax** as white solid (31.1 mg, 51% yield), mp 92-93 °C.  $R_f$  = 0.70 (100:1 petroleum ether/EtOAc).

$^1\text{H}$  NMR (400 MHz,  $\text{CDCl}_3$ , ppm)  $\delta$  8.15 (d,  $J$  = 2.5 Hz, 1H), 8.03 – 8.01 (m, 2H), 7.91 (s, 1H), 7.48 – 7.44 (m, 3H), 7.40 (d,  $J$  = 8.5 Hz, 1H), 7.26 – 7.23 (m, 1H);  $^{13}\text{C}$  NMR (100 MHz,  $\text{CDCl}_3$ , ppm)  $\delta$  167.0, 151.1, 134.3, 133.2, 132.9, 131.6, 131.4, 130.3, 130.0, 129.0, 128.8, 126.6, 118.7; HRMS (ESI)  $m/z$  calcd. for  $\text{C}_{15}\text{H}_{10}\text{Cl}_2\text{NS}^+$  ( $\text{M}+\text{H}$ ) $^+$  305.9906, found 305.9910.

#### 4-(3,4-Dichlorophenyl)-2-phenylthiazole (**3ay**)

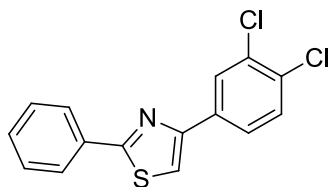

The reaction was conducted with 3',4'-dichloroacetophenone (**2y**, 37.8 mg, 0.2 mmol), benzylamine (**2a**, 44.0  $\mu$ L, 0.4 mmol), isonicotinic acid (24.6 mg, 0.2 mmol) and sulfur powder (12.8 mg, 0.4 mmol). The residue was purified by column chromatography on silica gel (petroleum ether/EtOAc = 400 :1) to yield the desired product **3ay** as white solid (43.1 mg, 72% yield), mp 121-122 °C.  $R_f$  = 0.70 (100:1 petroleum ether/EtOAc).

$^1\text{H}$  NMR (400 MHz,  $\text{CDCl}_3$ , ppm)  $\delta$  8.09 – 8.08 (m, 1H), 8.01 – 7.99 (m, 2H), 7.75 (dd,  $J$  = 8.4, 2.0 Hz, 1H), 7.47 – 7.43 (m, 5H);  $^{13}\text{C}$  NMR (100 MHz,  $\text{CDCl}_3$ , ppm)  $\delta$  168.3, 153.7, 134.3, 133.3, 132.9, 131.9, 130.6, 130.3, 128.9, 128.2, 126.6, 125.4, 113.7; HRMS (ESI)  $m/z$  calcd. for  $\text{C}_{15}\text{H}_{10}\text{Cl}_2\text{NS}^+$  ( $\text{M}+\text{H}$ ) $^+$  305.9906, found 305.9902.

### 9-Phenylnaphtho[1',2':4,5]thieno[3,2-d]thiazole (**3az**)

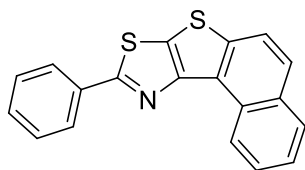

The reaction was conducted with 1'-acetonaphthone (**2z**, 33.0  $\mu$ L, 0.2 mmol), benzylamine (**2a**, 44.0  $\mu$ L, 0.4 mmol), isonicotinic acid (24.6 mg, 0.2 mmol) and sulfur powder (12.8 mg, 0.4 mmol). The residue was purified by column chromatography on silica gel (petroleum ether/EtOAc = 400 :1) to yield the desired product **3az** as white solid (25.4 mg, 40% yield), mp 158-160 °C.  $R_f$  = 0.70 (100:1 petroleum ether/EtOAc).

$^1\text{H}$  NMR (400 MHz,  $\text{CDCl}_3$ , ppm)  $\delta$  9.61 (d,  $J$  = 8.2 Hz, 1H), 8.13 – 8.11 (m, 2H), 7.95 (d,  $J$  = 8.1 Hz, 1H), 7.81 – 7.71 (m, 3H), 7.60 – 7.56 (m, 1H), 7.54 – 7.43 (m, 3H);  $^{13}\text{C}$  NMR (100 MHz,  $\text{CDCl}_3$ , ppm)  $\delta$  170.4, 157.3, 140.2, 134.1, 131.4, 130.7, 130.3, 129.0, 128.7, 128.0, 126.7, 126.7, 125.8, 125.7, 124.9, 121.1; HRMS (ESI)  $m/z$  calcd. for  $\text{C}_{19}\text{H}_{12}\text{NS}_2^+$  ( $\text{M}+\text{H}$ ) $^+$  318.0406, found 318.0408.

### 8-Phenylnaphtho[2',1':4,5]thieno[3,2-d]thiazole (**3aa'**)<sup>[6]</sup>

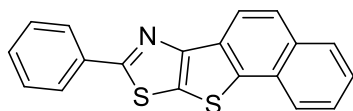

The reaction was conducted with 2'-acetonaphthone (**2a'**, 34.0 mg, 0.2 mmol), benzylamine (**2a**, 44.0  $\mu$ L, 0.4 mmol), isonicotinic acid (24.6 mg, 0.2 mmol) and sulfur powder (12.8 mg, 0.4 mmol). The residue was purified by column chromatography on silica gel (petroleum ether/EtOAc = 400 :1) to yield the desired product **3aa'** as white solid (28.5 mg, 45% yield), mp 192-193 °C.  $R_f$  = 0.70 (100:1 petroleum ether/EtOAc).

$^1\text{H}$  NMR (400 MHz,  $\text{CDCl}_3$ , ppm)  $\delta$  8.27 (d,  $J$  = 8.6 Hz, 1H), 8.04 (d,  $J$  = 7.6 Hz, 3H), 7.94 (d,  $J$  = 7.9 Hz, 1H), 7.85 (d,  $J$  = 8.6 Hz, 1H), 7.61 – 7.40 (m, 5H);  $^{13}\text{C}$  NMR (100 MHz,  $\text{CDCl}_3$ , ppm)  $\delta$  170.8, 157.4, 140.2, 134.0, 131.4, 130.3, 129.8, 129.2, 129.0, 128.2, 126.8, 126.6, 126.1, 125.9, 122.6, 120.2.

### 11-Phenylphenanthro[9',10':4,5]thieno[3,2-d]thiazole (**3ab'**)

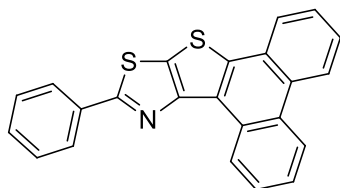

The reaction was conducted with 9-acetylphenanthrene (**2b'**, 45.0 mg, 0.2 mmol), benzylamine (**2a**, 44.0  $\mu$ L, 0.4 mmol), isonicotinic acid (24.6 mg, 0.2 mmol) and sulfur powder (12.8 mg, 0.4 mmol). The residue was purified by column chromatography on silica gel (petroleum ether/EtOAc = 400 :1) to yield the desired product **3ab'** as white solid (22.7 mg, 31% yield), mp 183-184 °C.  $R_f$  = 0.70 (100:1 petroleum ether/EtOAc).

$^1\text{H}$  NMR (400 MHz,  $\text{CDCl}_3$ , ppm)  $\delta$  9.74 (d,  $J$  = 8.1 Hz, 1H), 8.72 – 8.70 (m, 2H), 8.16 – 8.14 (m, 2H), 8.09 – 8.06 (m, 1H), 7.80 (t,  $J$  = 7.5 Hz, 1H), 7.73 – 7.69 (m, 1H), 7.66 – 7.61 (m, 2H), 7.55 – 7.47 (m, 3H);  $^{13}\text{C}$  NMR (100 MHz,  $\text{CDCl}_3$ , ppm)  $\delta$  170.4, 158.4, 139.4, 134.1, 130.3, 130.0, 129.1, 128.9, 128.8, 128.4, 128.2, 127.4, 127.2, 126.7, 126.6, 126.5, 125.6, 125.1, 123.7, 123.1, 122.9; HRMS (ESI)  $m/z$  calcd. for  $\text{C}_{23}\text{H}_{14}\text{NS}_2^+$  ( $\text{M}+\text{H}$ ) $^+$  368.0562, found 368.0567.

### 2-Phenylbenzo[4',5']thieno[2',3':4,5]thieno[3,2-d]thiazole (**3ac'**)<sup>[6]</sup>

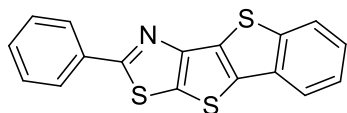

The reaction was conducted with 1-(benzo[*b*]thiophen-2-yl)ethanone (**2c'**, 35.4 mg, 0.2 mmol), benzylamine (**2a**, 44.0  $\mu$ L, 0.4 mmol), isonicotinic acid (24.6 mg, 0.2 mmol) and sulfur powder (12.8 mg, 0.4 mmol). The residue was purified by column chromatography on silica gel (petroleum ether/EtOAc = 50 :1) to yield the desired product **3ac'** as white solid (19.4 mg, 30% yield), mp 210-211 °C.  $R_f$  = 0.70 (100:1 petroleum ether/EtOAc).

$^1\text{H}$  NMR (400 MHz,  $\text{CDCl}_3$ , ppm)  $\delta$  8.00 – 7.94 (m, 2H), 7.89 (d,  $J$  = 7.9 Hz, 1H), 7.77 (d,  $J$  = 8.0 Hz, 1H), 7.49 – 7.44 (m, 4H), 7.41 (t,  $J$  = 7.5 Hz, 1H);  $^{13}\text{C}$  NMR (100 MHz,  $\text{CDCl}_3$ , ppm)  $\delta$  166.9, 151.6, 139.2, 137.0, 134.5, 132.7, 130.7, 129.1, 126.5, 125.6, 125.1, 123.0, 122.9, 120.2, 119.2.



**4-Phenyl-2-(*p*-tolyl)thiazole (3ba, CAS: 2227-61-4)<sup>[3]</sup>**

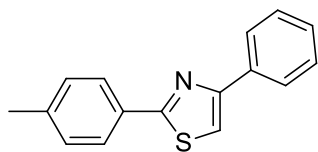

The reaction was conducted with acetophenone (**1a**, 24.0  $\mu$ L, 0.2 mmol), 4-methylbenzylamine (**2b**, 51.0  $\mu$ L, 0.4 mmol), isonicotinic acid (24.6 mg, 0.2 mmol) and sulfur powder (12.8 mg, 0.4 mmol). The residue was purified by column chromatography on silica gel (petroleum ether/EtOAc = 400:1) to yield the desired product **3ba** as white solid (31.6 mg, 63% yield), mp 126-127 °C.  $R_f$  = 0.70 (100:1 petroleum ether/EtOAc).

$^1\text{H}$  NMR (400 MHz,  $\text{CDCl}_3$ , ppm)  $\delta$  7.99 (d,  $J$  = 7.4 Hz, 2H), 7.93 (d,  $J$  = 8.1 Hz, 2H), 7.45 – 7.42 (m, 3H), 7.34 (t,  $J$  = 7.4 Hz, 1H), 7.25 (d,  $J$  = 8.0 Hz, 2H), 2.39 (s, 3H);  $^{13}\text{C}$  NMR (100 MHz,  $\text{CDCl}_3$ , ppm)  $\delta$  168.0, 156.1, 140.2, 134.6, 131.1, 129.5, 128.7, 128.1, 126.5, 126.4, 112.1, 21.4.

**2-(4-Fluorophenyl)-4-phenylthiazole (3ca, CAS: 1095792-53-2)<sup>[7]</sup>**

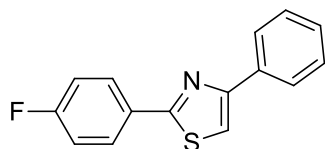

The reaction was conducted with acetophenone (**1a**, 24.0  $\mu$ L, 0.2 mmol), 4-fluorobenzylamine (**2c**, 46.0  $\mu$ L, 0.4 mmol), isonicotinic acid (24.6 mg, 0.2 mmol) and sulfur powder (12.8 mg, 0.4 mmol). The residue was purified by column chromatography on silica gel (petroleum ether/EtOAc = 300:1) to yield the desired product **3ca** as white solid (30.1 mg, 59% yield), mp 117-118 °C.  $R_f$  = 0.60 (100:1 petroleum ether/EtOAc).

$^1\text{H}$  NMR (400 MHz,  $\text{CDCl}_3$ , ppm)  $\delta$  8.05 – 7.99 (m, 4H), 7.48 – 7.44 (m, 3H), 7.39 – 7.35 (m, 1H), 7.18 – 7.14 (m, 2H);  $^{13}\text{C}$  NMR (100 MHz,  $\text{CDCl}_3$ , ppm)  $\delta$  166.6, 163.8 (d,  $J$  = 250.3 Hz), 156.3, 134.3, 130.1 (d,  $J$  = 3.1 Hz), 128.7, 128.5 (d,  $J$  = 8.5 Hz), 128.2, 126.4, 116.1, 115.9 (d,  $J$  = 22.0 Hz);  $^{19}\text{F}$  NMR (376 MHz,  $\text{CDCl}_3$ , ppm)  $\delta$  -110.5.

### 2-(4-Chlorophenyl)-4-phenylthiazole (**3da**, CAS: 2227-72-7)<sup>[3]</sup>

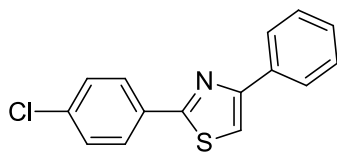

The reaction was conducted with acetophenone (**1a**, 24.0  $\mu$ L, 0.2 mmol), 4-chlorobenzylamine (**2d**, 50.0  $\mu$ L, 0.4 mmol), isonicotinic acid (24.6 mg, 0.2 mmol) and sulfur powder (12.8 mg, 0.4 mmol). The residue was purified by column chromatography on silica gel (petroleum ether/EtOAc = 300:1) to yield the desired product **3da** as white solid (33.1 mg, 61% yield), mp 104-105 °C.  $R_f$  = 0.65 (100:1 petroleum ether/EtOAc).

$^1\text{H}$  NMR (400 MHz,  $\text{CDCl}_3$ , ppm)  $\delta$  7.97 – 7.93 (m, 4H), 7.50 – 7.38 (m, 5H), 7.36 – 7.32 (m, 1H);  $^{13}\text{C}$  NMR (100 MHz,  $\text{CDCl}_3$ , ppm)  $\delta$  166.4, 156.3, 135.9, 134.2, 132.1, 129.1, 128.7, 128.2, 127.7, 126.4, 112.8.

### 2-(4-Bromophenyl)-4-phenylthiazole (**3ea**, CAS: 859471-47-9)<sup>[8]</sup>

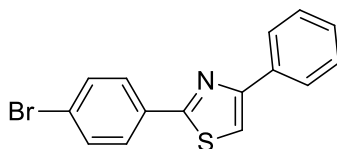

The reaction was conducted with acetophenone (**1a**, 24.0  $\mu$ L, 0.2 mmol), 4-bromobenzylamine (**2e**, 52.0  $\mu$ L, 0.4 mmol), isonicotinic acid (24.6 mg, 0.2 mmol) and sulfur powder (12.8 mg, 0.4 mmol). The residue was purified by column chromatography on silica gel (petroleum ether/EtOAc = 300:1) to yield the desired product **3ea** as white solid (44.1 mg, 70% yield), mp 104-105 °C.  $R_f$  = 0.60 (100:1 petroleum ether/EtOAc).

$^1\text{H}$  NMR (400 MHz,  $\text{CDCl}_3$ , ppm)  $\delta$  7.97 (d,  $J$  = 7.3 Hz, 2H), 7.89 (d,  $J$  = 8.5 Hz, 2H), 7.57 (d,  $J$  = 8.4 Hz, 2H), 7.49 – 7.41 (m, 3H), 7.35 (t,  $J$  = 7.3 Hz, 1H);  $^{13}\text{C}$  NMR (100 MHz,  $\text{CDCl}_3$ , ppm)  $\delta$  166.5, 156.4, 134.2, 132.6, 132.0, 128.7, 128.3, 127.9, 126.4, 124.2, 112.8.

### 4-Phenyl-2-(4-(trifluoromethyl)phenyl)thiazole (**3fa**)<sup>[3]</sup>

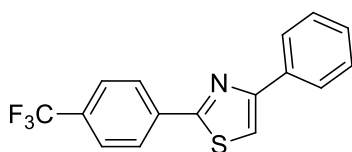

The reaction was conducted with acetophenone (**1a**, 24.0  $\mu$ L, 0.2 mmol),

4-(trifluoromethyl)benzylamine (**2f**, 57.0  $\mu$ L, 0.4 mmol), isonicotinic acid (24.6 mg, 0.2 mmol) and sulfur powder (12.8 mg, 0.4 mmol). The residue was purified by column chromatography on silica gel (petroleum ether/EtOAc = 300:1) to yield the desired product **3fa** as white solid (43.3 mg, 71% yield), mp 119-120 °C.  $R_f$  = 0.70 (100:1 petroleum ether/EtOAc).

$^1\text{H}$  NMR (400 MHz,  $\text{CDCl}_3$ , ppm)  $\delta$  8.13 (d,  $J$  = 8.1 Hz, 2H), 7.99 – 7.97 (m, 2H), 7.69 (d,  $J$  = 8.3 Hz, 2H), 7.51 (s, 1H), 7.45 (t,  $J$  = 7.5 Hz, 2H), 7.38 – 7.35 (m, 1H);  $^{13}\text{C}$  NMR (100 MHz,  $\text{CDCl}_3$ , ppm)  $\delta$  165.9, 156.8, 136.8, 134.1, 131.6 (q,  $J$  = 32.4 Hz), 128.8, 128.4, 126.7, 126.4, 125.9 (q,  $J$  = 3.7 Hz), 123.9 (q,  $J$  = 270.6 Hz), 113.62;  $^{19}\text{F}$  NMR (376 MHz,  $\text{CDCl}_3$ , ppm)  $\delta$  -62.7.

#### 4-Phenyl-2-(4-(trifluoromethoxy)phenyl)thiazole (**3ga**)

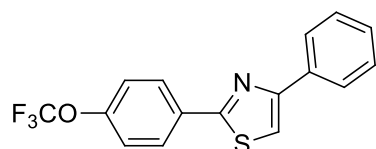

The reaction was conducted with acetophenone (**1a**, 24.0  $\mu$ L, 0.2 mmol), 4-(trifluoromethoxy)benzylamine (**2g**, 68.0  $\mu$ L, 0.4 mmol), isonicotinic acid (24.6 mg, 0.2 mmol) and sulfur powder (12.8 mg, 0.4 mmol). The residue was purified by column chromatography on silica gel (petroleum ether/EtOAc = 300:1) to yield the desired product **3ga** as white solid (32.7 mg, 51% yield), mp 100-101 °C.  $R_f$  = 0.50 (100:1 petroleum ether/EtOAc).

$^1\text{H}$  NMR (400 MHz,  $\text{CDCl}_3$ , ppm)  $\delta$  8.07 (d,  $J$  = 8.6 Hz, 2H), 7.99 (d,  $J$  = 7.8 Hz, 2H), 7.49 (s, 1H), 7.45 (t,  $J$  = 7.6 Hz, 2H), 7.36 (t,  $J$  = 7.3 Hz, 1H), 7.31 (d,  $J$  = 8.4 Hz, 2H);  $^{13}\text{C}$  NMR (100 MHz,  $\text{CDCl}_3$ , ppm)  $\delta$  166.1, 156.5, 150.3, 134.3, 132.4, 128.8, 128.3, 128.1, 126.4, 121.2, 120.4 (q,  $J$  = 256.2 Hz), 113.0;  $^{19}\text{F}$  NMR (376 MHz,  $\text{CDCl}_3$ , ppm)  $\delta$  -57.7; HRMS (ESI)  $m/z$  calcd. for  $\text{C}_{16}\text{H}_{11}\text{F}_3\text{NOS}^+$  ( $\text{M}+\text{H}$ ) $^+$  322.0508, found 322.0511.

#### 4-Phenyl-2-(*m*-tolyl)thiazole (**3ha**, CAS: 2227-70-5)

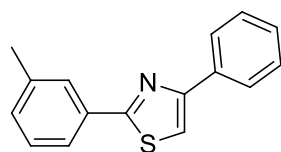

The reaction was conducted with acetophenone (**1a**, 24.0  $\mu$ L, 0.2 mmol), 3-methylbenzylamine (**2h**, 55  $\mu$ L, 0.4 mmol), isonicotinic acid (24.6 mg, 0.2 mmol) and sulfur powder (12.8 mg, 0.4

mmol). The residue was purified by column chromatography on silica gel (petroleum ether/EtOAc = 300:1) to yield the desired product **3ha** as white solid (33.1 mg, 66% yield), mp 72-73 °C.  $R_f$  = 0.60 (100:1 petroleum ether/EtOAc).

$^1\text{H}$  NMR (400 MHz,  $\text{CDCl}_3$ , ppm)  $\delta$  8.00 – 7.99 (m, 2H), 7.88 (s, 1H), 7.82 (d,  $J$  = 7.7 Hz, 1H), 7.46 – 7.42 (m, 3H), 7.36 – 7.32 (m, 2H), 7.25 – 7.23 (m, 1H), 2.43 (s, 3H);  $^{13}\text{C}$  NMR (100 MHz,  $\text{CDCl}_3$ , ppm)  $\delta$  168.1, 156.2, 138.7, 134.5, 133.6, 130.8, 128.8, 128.7, 128.1, 127.1, 126.4, 123.8, 112.5, 21.4; HRMS (ESI)  $m/z$  calcd. for  $\text{C}_{16}\text{H}_{14}\text{NS}^+$  ( $\text{M}+\text{H}$ ) $^+$  252.0842, found 252.0845.

### 2-(3-Fluorophenyl)-4-phenylthiazole (3ia)

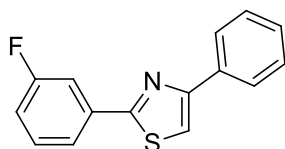

The reaction was conducted with acetophenone (**1a**, 24.0  $\mu\text{L}$ , 0.2 mmol), 3-fluorobenzylamine (**2i**, 46.0  $\mu\text{L}$ , 0.4 mmol), isonicotinic acid (24.6 mg, 0.2 mmol) and sulfur powder (12.8 mg, 0.4 mmol). The residue was purified by column chromatography on silica gel (petroleum ether/EtOAc = 200:1) to yield the desired product **3ia** as light yellow solid (34.7 mg, 68% yield), mp 91-92 °C.  $R_f$  = 0.60 (100:1 petroleum ether/EtOAc).

$^1\text{H}$  NMR (400 MHz,  $\text{CDCl}_3$ , ppm)  $\delta$  7.98 – 7.96 (m, 2H), 7.80 – 7.75 (m, 2H), 7.45 – 7.42 (m, 3H), 7.40 – 7.33 (m, 2H), 7.13 – 7.08 (m, 1H);  $^{13}\text{C}$  NMR (100 MHz,  $\text{CDCl}_3$ , ppm)  $\delta$  166.2, 163.0 (d,  $J$  = 246.6 Hz), 156.4, 135.7 (d,  $J$  = 8.2 Hz), 134.2, 130.5 (d,  $J$  = 8.2 Hz), 128.7, 128.3, 126.4, 122.3 (d,  $J$  = 2.8 Hz), 116.8 (d,  $J$  = 21.4 Hz), 113.4 (d,  $J$  = 23.5 Hz), 113.1;  $^{19}\text{F}$  NMR (376 MHz,  $\text{CDCl}_3$ , ppm)  $\delta$  -112.3; HRMS (ESI)  $m/z$  calcd. for  $\text{C}_{15}\text{H}_{11}\text{FNS}^+$  ( $\text{M}+\text{H}$ ) $^+$  256.0591, found 256.0594.

### 4-Phenyl-2-(*o*-tolyl)thiazole (3ja)

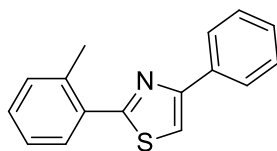

The reaction was conducted with acetophenone (**1a**, 24.0  $\mu\text{L}$ , 0.2 mmol), 2-methylbenzylamine (**2j**, 50.0  $\mu\text{L}$ , 0.4 mmol), isonicotinic acid (24.6 mg, 0.2 mmol) and sulfur powder (12.8 mg, 0.4 mmol). The residue was purified by column chromatography on silica gel (petroleum ether/EtOAc =

300:1) to yield the desired product **3ja** as colourless oily liquid (28.6 mg, 57% yield).  $R_f = 0.70$  (100:1 petroleum ether/EtOAc).

$^1\text{H}$  NMR (400 MHz,  $\text{CDCl}_3$ , ppm)  $\delta$  7.99 (d,  $J = 7.4$  Hz, 2H), 7.78 (d,  $J = 7.5$  Hz, 1H), 7.53 (s, 1H), 7.44 (t,  $J = 7.6$  Hz, 2H), 7.36 – 7.24 (m, 4H), 2.69 (s, 3H);  $^{13}\text{C}$  NMR (100 MHz,  $\text{CDCl}_3$ , ppm)  $\delta$  167.6, 155.6, 136.7, 134.6, 133.0, 131.6, 129.9, 129.4, 128.7, 128.1, 126.4, 126.1, 113.0, 21.7; HRMS (ESI)  $m/z$  calcd. for  $\text{C}_{16}\text{H}_{14}\text{NS}^+$  ( $\text{M}+\text{H}$ ) $^+$  252.0842, found 252.0846.

### 2-(2-Chlorophenyl)-4-phenylthiazole (3ka)

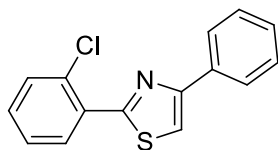

The reaction was conducted with acetophenone (**1a**, 24.0  $\mu\text{L}$ , 0.2 mmol), 2-chlorobenzylamine (**2k**, 52.0  $\mu\text{L}$ , 0.4 mmol), isonicotinic acid (24.6 mg, 0.2 mmol) and sulfur powder (12.8 mg, 0.4 mmol). The residue was purified by column chromatography on silica gel (petroleum ether/EtOAc = 300:1) to yield the desired product **3ka** as white solid (37.9 mg, 70% yield), mp 67-68  $^{\circ}\text{C}$ .  $R_f = 0.50$  (100:1 petroleum ether/EtOAc).

$^1\text{H}$  NMR (400 MHz,  $\text{CDCl}_3$ , ppm)  $\delta$  8.39 (dd,  $J = 7.7, 1.9$  Hz, 1H), 8.01 – 7.99 (m, 2H), 7.61 (s, 1H), 7.49 (dd,  $J = 7.8, 1.4$  Hz, 1H), 7.44 (t,  $J = 7.6$  Hz, 2H), 7.40 – 7.31 (m, 3H);  $^{13}\text{C}$  NMR (100 MHz,  $\text{CDCl}_3$ , ppm)  $\delta$  163.1, 154.9, 134.3, 131.9, 131.0, 130.6, 130.3, 128.7, 128.2, 127.0, 126.4, 114.6; HRMS (ESI)  $m/z$  calcd. for  $\text{C}_{15}\text{H}_{11}\text{ClNS}^+$  ( $\text{M}+\text{H}$ ) $^+$  272.0295, found 272.0299.

### 2-(3-Chloro-4-fluorophenyl)-4-phenylthiazole (3la)

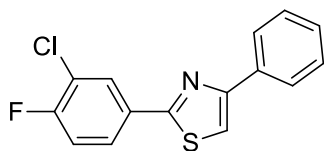

The reaction was conducted with acetophenone (**1a**, 24.0  $\mu\text{L}$ , 0.2 mmol), 3-chloro-4-fluorobenzylamine (**2l**, 64.0 mg, 0.4 mmol), isonicotinic acid (24.6 mg, 0.2 mmol) and sulfur powder (12.8 mg, 0.4 mmol). The residue was purified by column chromatography on silica gel (petroleum ether/EtOAc = 300:1) to yield the desired product **3la** as white solid (29.5 mg, 51% yield), mp 108-109  $^{\circ}\text{C}$ .  $R_f = 0.50$  (100:1 petroleum ether/EtOAc).

$^1\text{H}$  NMR (400 MHz,  $\text{CDCl}_3$ , ppm)  $\delta$  8.12 (dd,  $J = 7.0, 2.2$  Hz, 1H), 7.97 (d,  $J = 7.3$  Hz, 2H), 7.88 – 7.85 (m, 1H), 7.47 – 7.43 (m, 3H), 7.36 (t,  $J = 7.3$  Hz, 1H), 7.21 (t,  $J = 8.6$  Hz, 1H);  $^{13}\text{C}$  NMR (100 MHz,  $\text{CDCl}_3$ , ppm)  $\delta$  165.1, 159.1 (d,  $J = 252.7$  Hz), 156.5, 134.1, 131.0 (d,  $J = 3.9$  Hz), 128.8, 128.7, 128.4, 126.4, 126.3, 121.9 (d,  $J = 18.4$  Hz), 117.0 (d,  $J = 21.8$  Hz), 113.0;  $^{19}\text{F}$  NMR (376 MHz,  $\text{CDCl}_3$ , ppm)  $\delta$  -113.0; HRMS (ESI)  $m/z$  calcd. for  $\text{C}_{15}\text{H}_{10}\text{ClFNS}^+$  ( $\text{M}+\text{H}$ ) $^+$  290.0201, found 290.0205.

### 2-(3, 5-Difluorophenyl)-4-phenylthiazole (3ma)

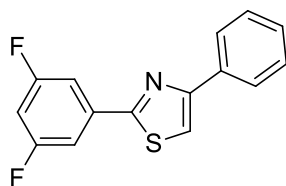

The reaction was conducted with acetophenone (**1a**, 24.0  $\mu\text{L}$ , 0.2 mmol), (3,5-difluorophenyl)methanamine (**2m**, 58.0 mg, 0.4 mmol), isonicotinic acid (24.6 mg, 0.2 mmol) and sulfur powder (12.8 mg, 0.4 mmol). The residue was purified by column chromatography on silica gel (petroleum ether/EtOAc = 300:1) to yield the desired product **3ma** as white solid (36.6 mg, 67% yield), mp 135-136  $^\circ\text{C}$ .  $R_f = 0.50$  (100:1 petroleum ether/EtOAc).

$^1\text{H}$  NMR (400 MHz,  $\text{CDCl}_3$ , ppm)  $\delta$  7.96 (d,  $J = 7.6$  Hz, 2H), 7.59 – 7.51 (m, 2H), 7.48 (s, 1H), 7.44 (t,  $J = 7.5$  Hz, 2H), 7.35 (t,  $J = 7.3$  Hz, 1H), 6.85 (t,  $J = 8.7$  Hz, 1H);  $^{13}\text{C}$  NMR (100 MHz,  $\text{CDCl}_3$ , ppm)  $\delta$  164.9 (t,  $J = 3.6$  Hz), 163.2 (dd,  $J = 249.1, 12.7$  Hz), 156.6, 136.6 (t,  $J = 10.0$  Hz), 134.0, 128.8, 128.5, 126.4, 113.5, 109.4 (dd,  $J = 27.2, 11.7$  Hz), 105.1 (t,  $J = 25.5$  Hz);  $^{19}\text{F}$  NMR (376 MHz,  $\text{CDCl}_3$ , ppm)  $\delta$  -108.6; HRMS (ESI)  $m/z$  calcd. for  $\text{C}_{15}\text{H}_{10}\text{F}_2\text{NS}^+$  ( $\text{M}+\text{H}$ ) $^+$  274.0497, found 274.0451.

### 4-Phenyl-2-(pyridin-4-yl)thiazole (3na, CAS: 106950-18-9)<sup>[9]</sup>

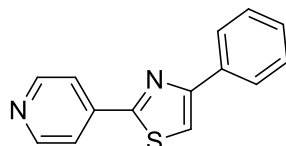

The reaction was conducted with acetophenone (**1a**, 24.0  $\mu\text{L}$ , 0.2 mmol), 4-pyridinemethanamine (**2n**, 44.0  $\mu\text{L}$ , 0.4 mmol), isonicotinic acid (24.6 mg, 0.2 mmol) and sulfur powder (12.8 mg, 0.4 mmol). The residue was purified by column chromatography on silica gel (petroleum ether/EtOAc

= 15:1) to yield the desired product **3na** as brown solid (22.4 mg, 47% yield), mp 109-110 °C.  $R_f$  = 0.50 (5:1 petroleum ether/EtOAc).

$^1\text{H}$  NMR (400 MHz,  $\text{CDCl}_3$ , ppm)  $\delta$  8.72 (d,  $J$  = 5.1 Hz, 2H), 7.98 (d,  $J$  = 8.2 Hz, 2H), 7.89 (d,  $J$  = 4.9 Hz, 2H), 7.58 (s, 1H), 7.46 (t,  $J$  = 7.7 Hz, 2H), 7.38 (t,  $J$  = 7.3 Hz, 1H);  $^{13}\text{C}$  NMR (100 MHz,  $\text{CDCl}_3$ , ppm)  $\delta$  164.7, 157.1, 150.5, 140.4, 133.9, 128.8, 128.5, 126.4, 120.3, 114.3.

***N*-(1-Phenylethyl)benzothioamide (7, CAS: 64551-86-6)<sup>[10]</sup>**

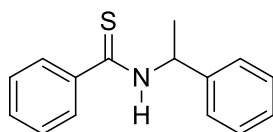

The reaction was conducted with benzaldehyde (4 mmol), 1-phenylethanamine (6 mmol), sulfur powder (8 mmol), and  $\text{Na}_2\text{S} \cdot 9\text{H}_2\text{O}$  (10 mol%). The residue was purified by column chromatography on silica gel (petroleum ether/ dichloromethane = 1:1) to yield the desired product **7** as yellow solid (0.63 g, 65% yield).

$^1\text{H}$  NMR (400 MHz,  $\text{CDCl}_3$ , ppm)  $\delta$  7.83 (d,  $J$  = 6.8 Hz, 1H), 7.72 – 7.60 (m, 2H), 7.45 – 7.24 (m, 8H), 5.97 – 5.78 (m, 1H), 1.64 (s, 3H);  $^{13}\text{C}$  NMR (100 MHz,  $\text{CDCl}_3$ , ppm)  $\delta$  197.8, 141.7, 141.2, 130.8, 128.6, 128.2, 127.6, 126.5, 126.4, 54.9, 20.1.

**(*E*)-1-Phenyl-*N*-(1-phenylethylidene)methanamine (8, CAS: 14428-98-9)<sup>[11]</sup>**

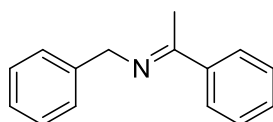

To a solution of benzylamine (6 mmol) in ethanol (25 mL) was added the acetophenone (5 mmol) and appropriate molecular sieve, the reaction mixture was allowed to reflux for 4 h using Dean–Stark apparatus. The progress of the reaction was checked by TLC. The solvent was removed in vacuo and the residue was recrystallized with ethanol to yield the desired product **8** as white solid (0.71 g, 68% yield).

$^1\text{H}$  NMR (400 MHz,  $\text{CD}_3\text{OD}-d_4$ , ppm)  $\delta$  7.70 (d,  $J$  = 8.1 Hz, 2H), 7.58 – 7.32 (m, 6H), 7.23 (d,  $J$  = 8.0 Hz, 2H), 4.09 (s, 2H), 2.36 (s, 3H).

**(E)-N-(1-Phenylethyl)benzothioamide (9, CAS: 98393-39-6)<sup>[12]</sup>**

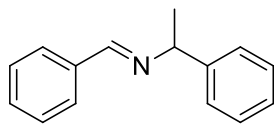

To a solution of 1-phenylethanamine (6 mmol) in ethanol (25 mL) was added the benzaldehyde (5 mmol) and appropriate molecular sieve, the reaction mixture was allowed to reflux for 4 h using Dean–Stark apparatus. The progress of the reaction was checked by TLC. The solvent was removed in vacuo and the residue was recrystallized with ethanol to yield the desired product **9** as white solid (0.65 g, 62% yield).

<sup>1</sup>H NMR (400 MHz, CDCl<sub>3</sub>, ppm)  $\delta$  8.54 (s, 1H), 7.68 (s, 2H), 7.44 – 6.91 (m, 8H), 4.33 – 3.91 (m, 1H), 1.50 (d,  $J$  = 4.9 Hz, 3H).

## 5. References

- [1] M. Narender, M. S. Reddy, R. Sridhar, Y. V. D. Nageswar and K. Rama Rao, *Tetrahedron Letters*, 2005, **46**, 5953.
- [2] T. Yamamoto and H. Togo, *Eur. J. Org. Chem.*, 2018, 4187.
- [3] S. Tani, T. N. Uehara, J. Yamaguchi and K. Itami, *Chem. Sci.*, 2014, **5**, 123.
- [4] T. Rozsa, M. Duma, L. Vlase, I. Ionuț, A. Pîrnău, B. Tîperciuc and O. Oniga, *J. Heterocyclic Chem.*, 2015, **52**, 999.
- [5] M. Ueno and H. Togo, *Synthesis*, 2004, 2673.
- [6] H. W. Huang, Z. H. Xu, X. C. Ji, B. Li and G.-J. Deng, *Org. Lett.*, 2018, **20**, 4917.
- [7] S. K. Kim, J.-H. Kim, Y. C. Park, J. W. Kim and E. K. Yum, *Tetrahedron*, 2013, **69**, 10990.
- [8] B. L. C. King and F. M. Miller, *J. Am. Chem. Soc.*, 1948, **71**, 367.
- [9] D. Kumar, N. Maruthi Kumar, G. Patel, S. Gupta and R. S. Varma, *Tetrahedron Letters*, 2011, **52**, 1983.
- [10] K. Okamoto, T. Yamamoto and T. Kanbara, *Synlett*, 2007, 2687.
- [11] R. Sarma and D. Prajapati, *Chem. Commun.*, 2011, **47**, 9525.
- [12] Alison E. Wendlandt and Shannon S. Stahl, *Org. Lett.*, 2012, **14**, 2850



## 6. Copies of $^1\text{H}$ , $^{13}\text{C}$ and $^{19}\text{F}$ NMR spectra of all products

$^1\text{H}$  and  $^{13}\text{C}$  NMR spectra of **3aa**

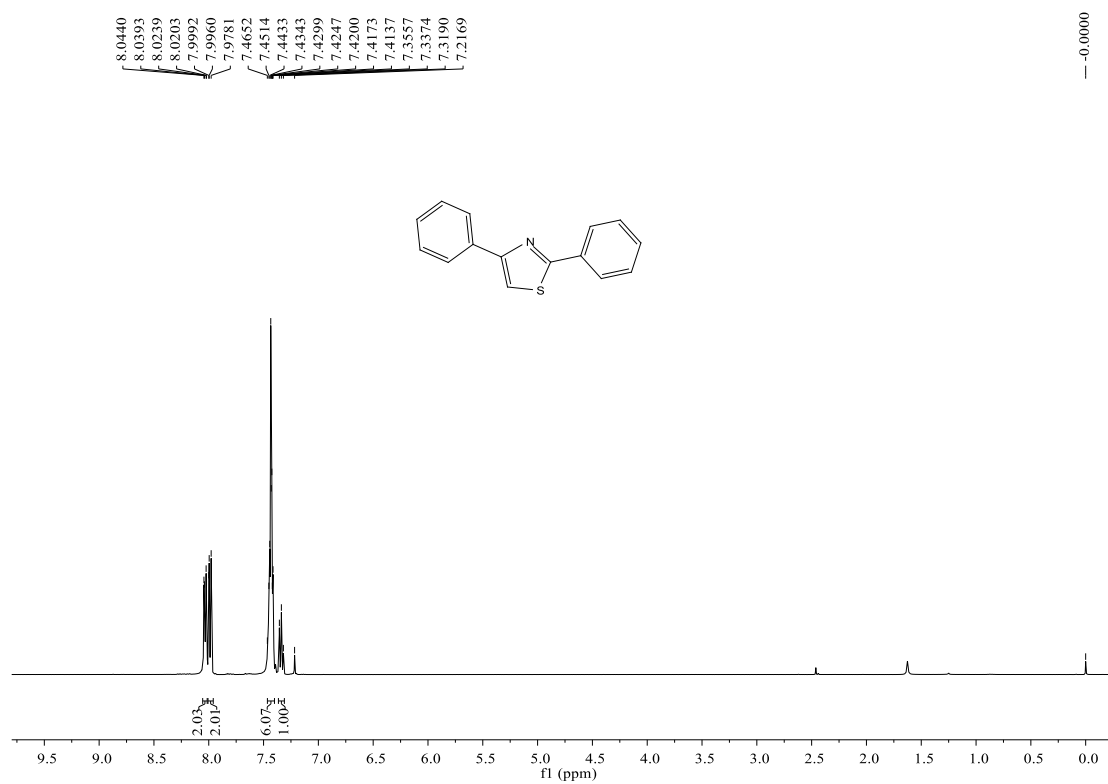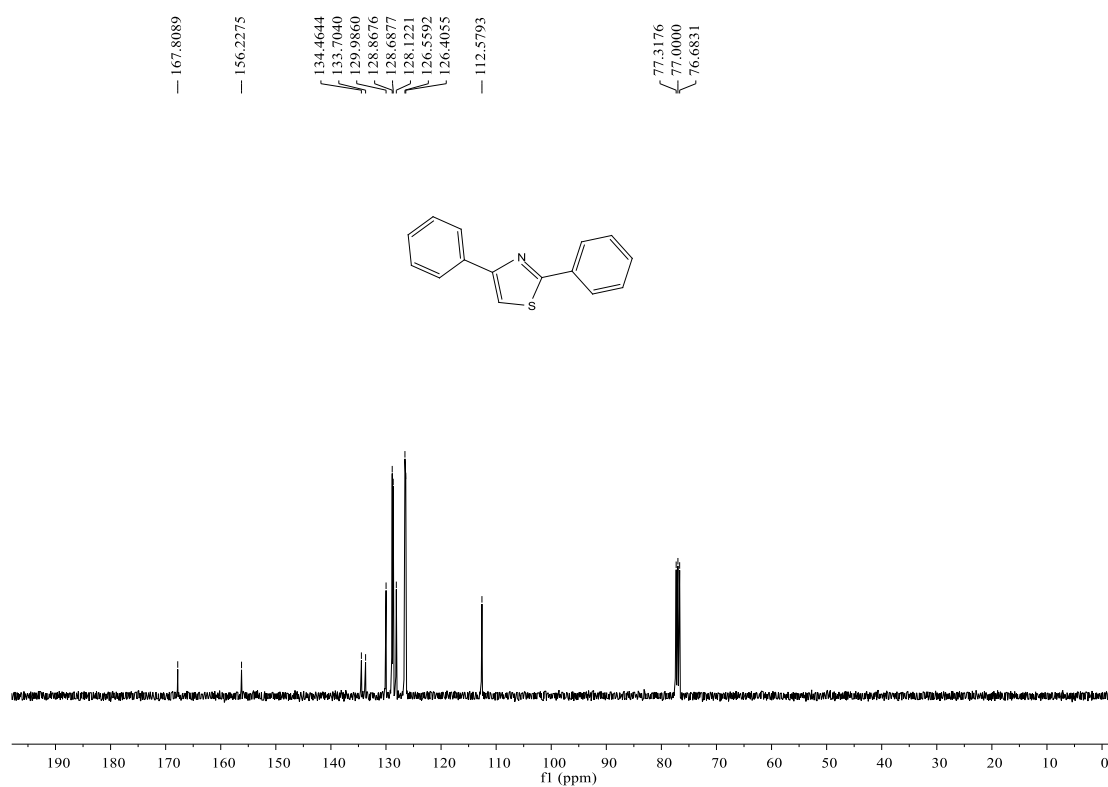

$^1\text{H}$  and  $^{13}\text{C}$  NMR spectra of **3ab**

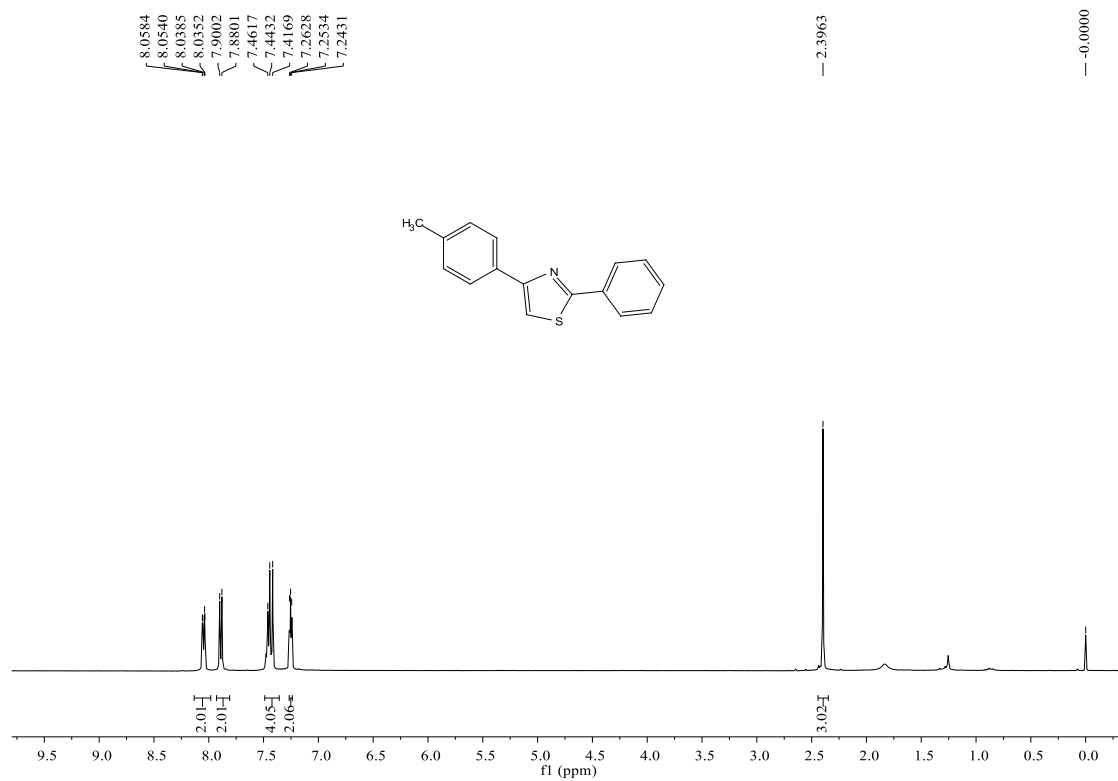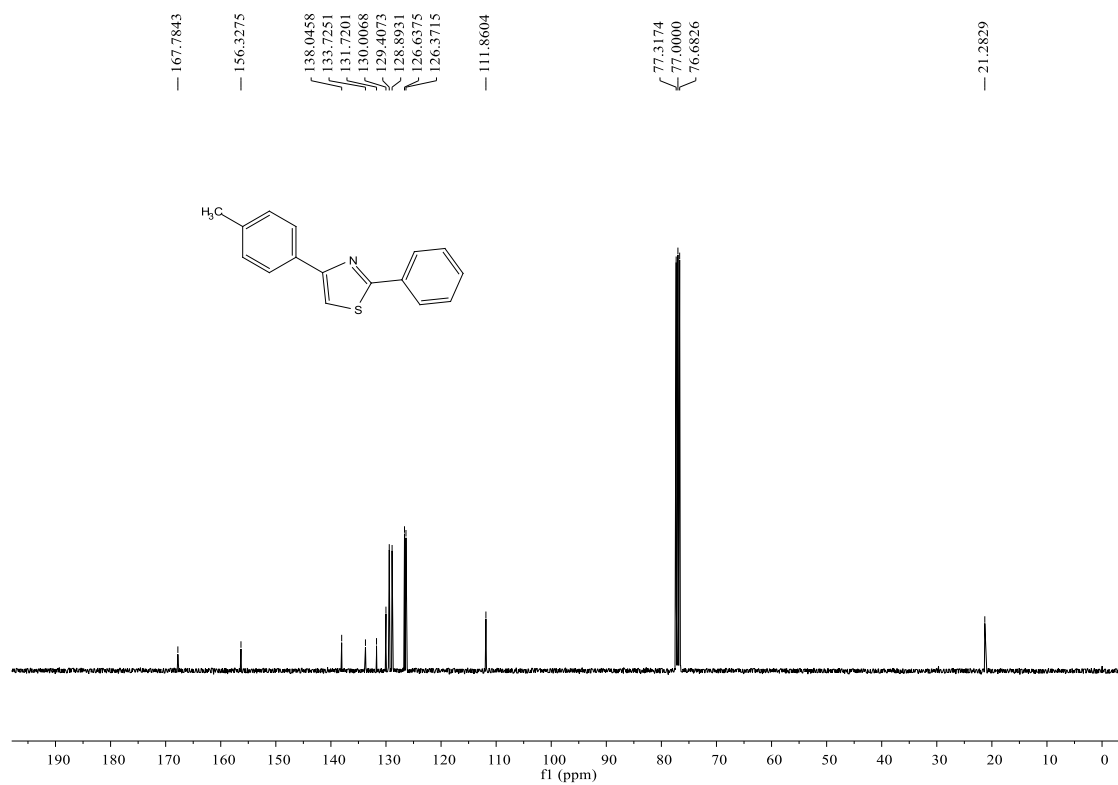

$^1\text{H}$  and  $^{13}\text{C}$  NMR spectra of **3ac**

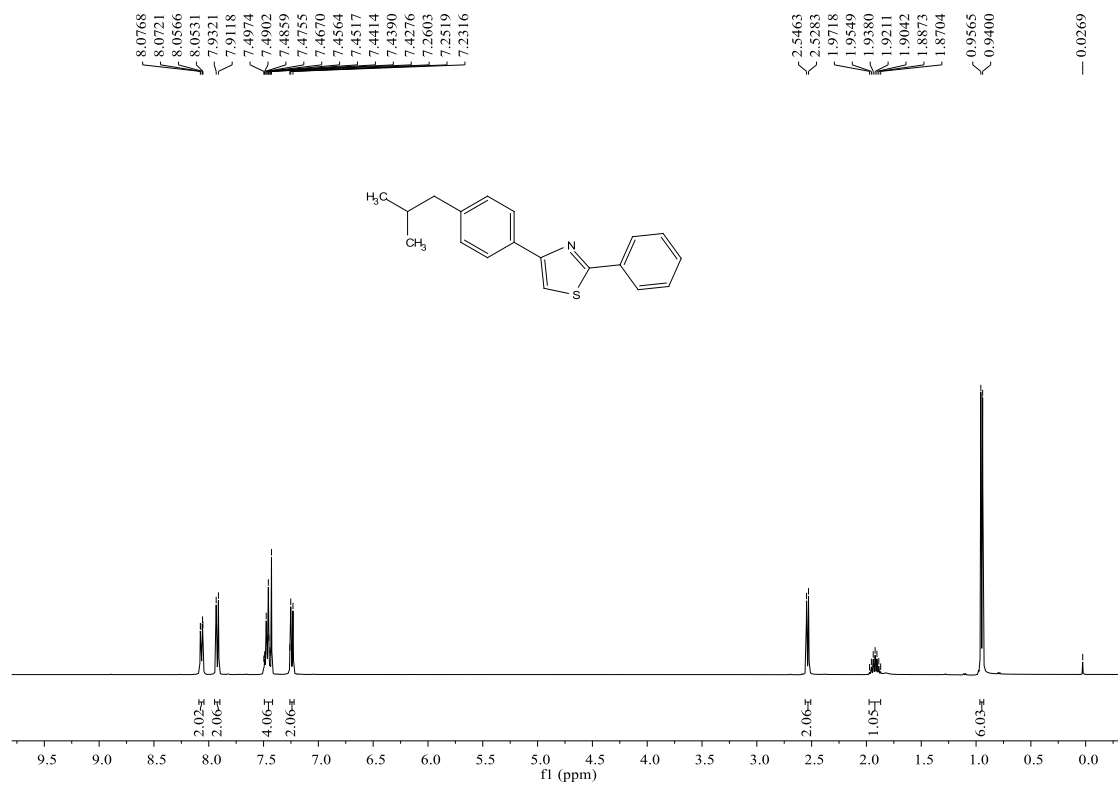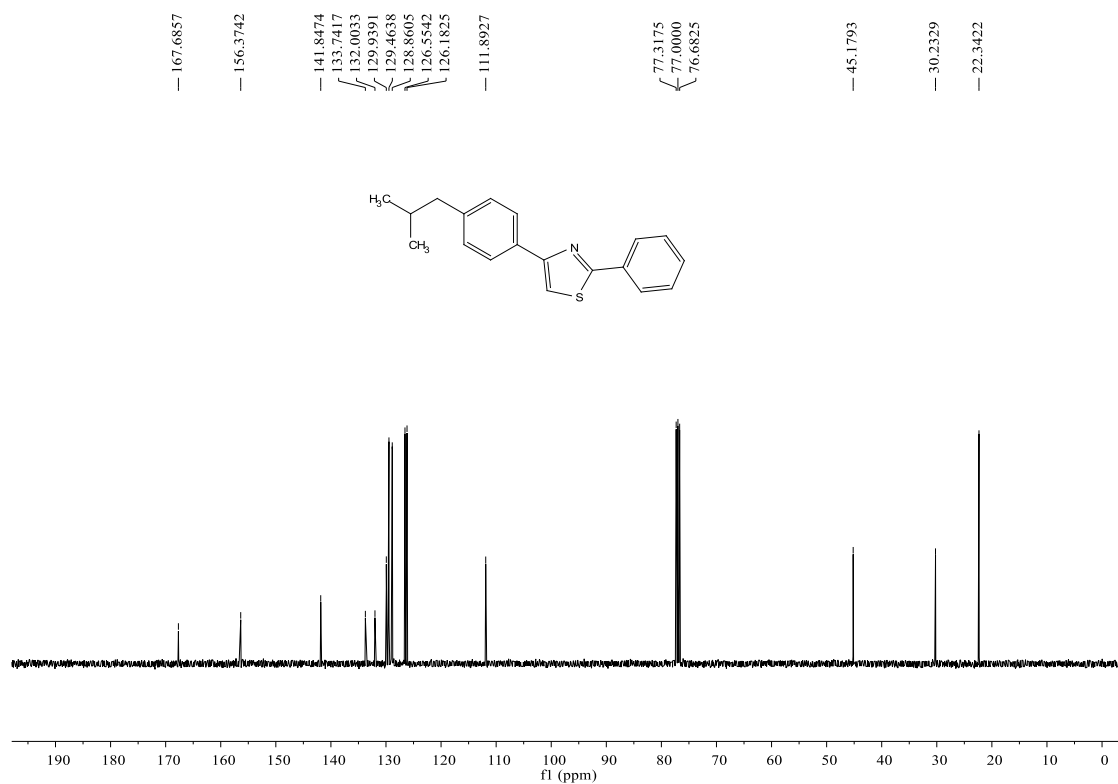

$^1\text{H}$  and  $^{13}\text{C}$  NMR spectra of **3ad**

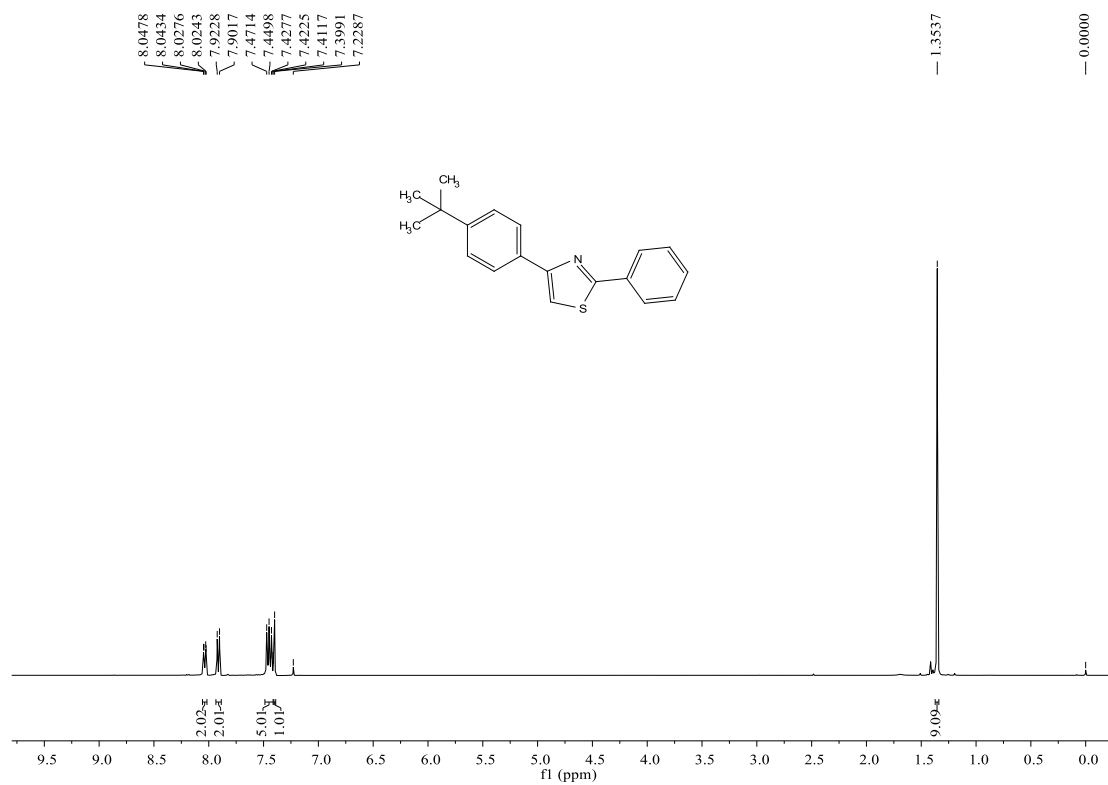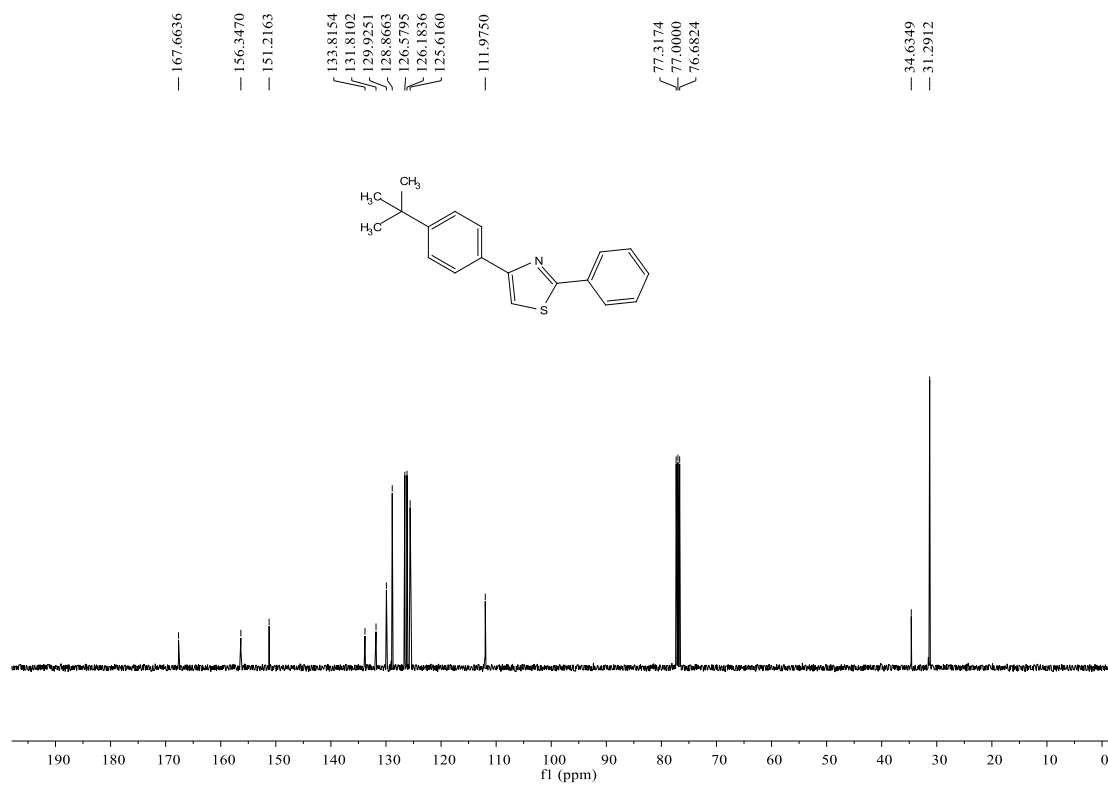

$^1\text{H}$  and  $^{13}\text{C}$  NMR spectra of **3ae**

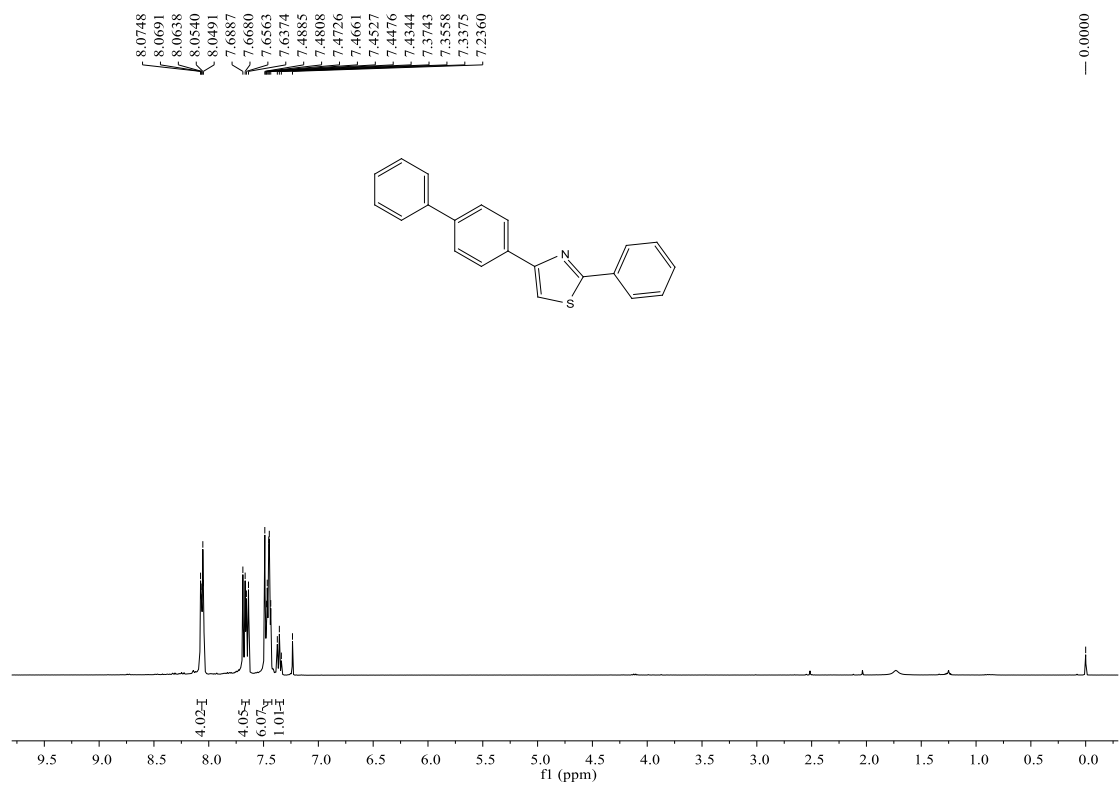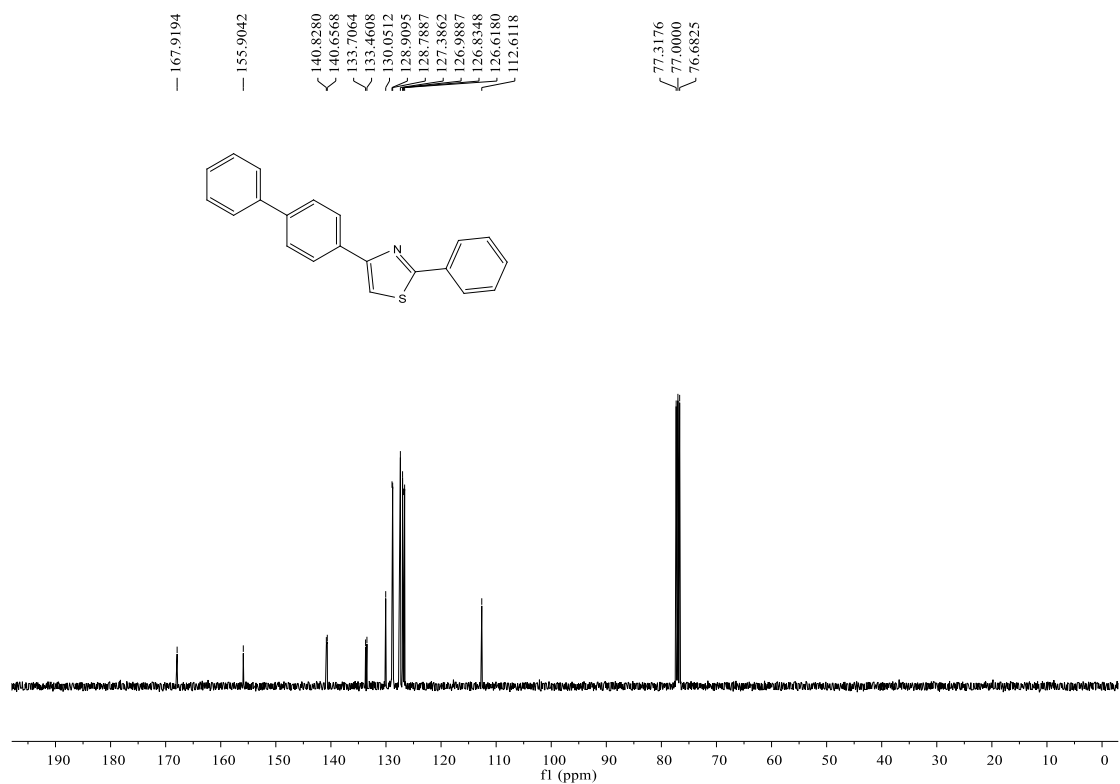

$^1\text{H}$  and  $^{13}\text{C}$  NMR spectra of **3af**

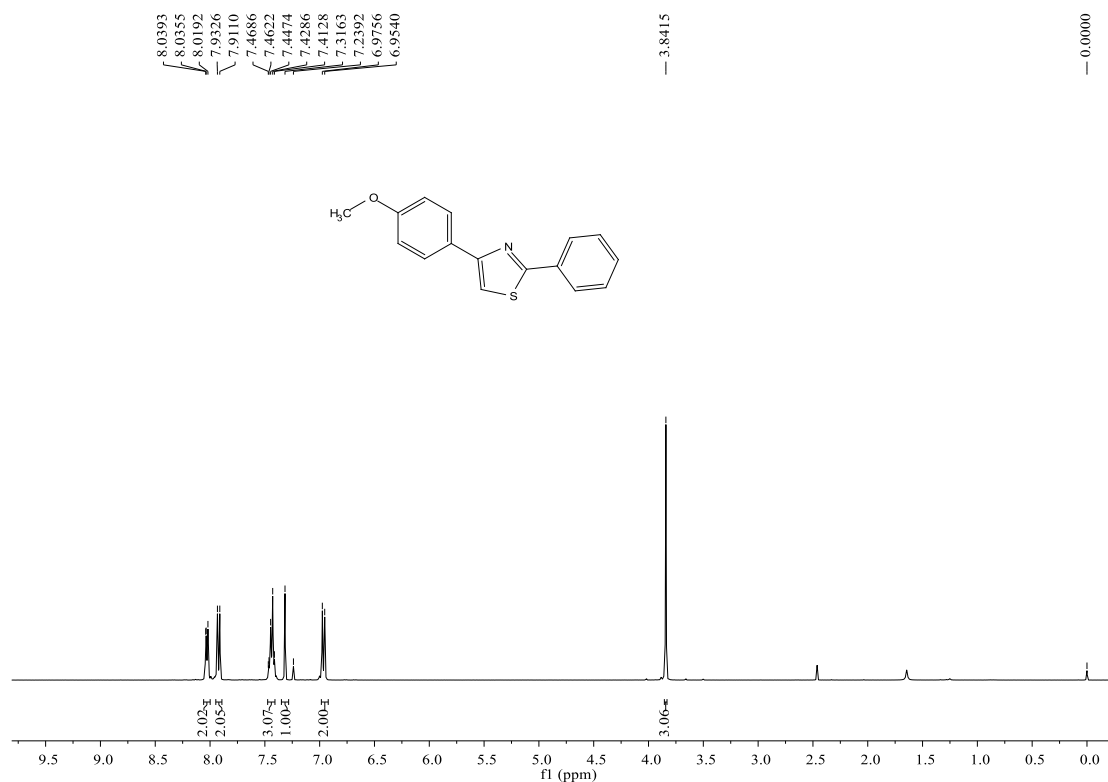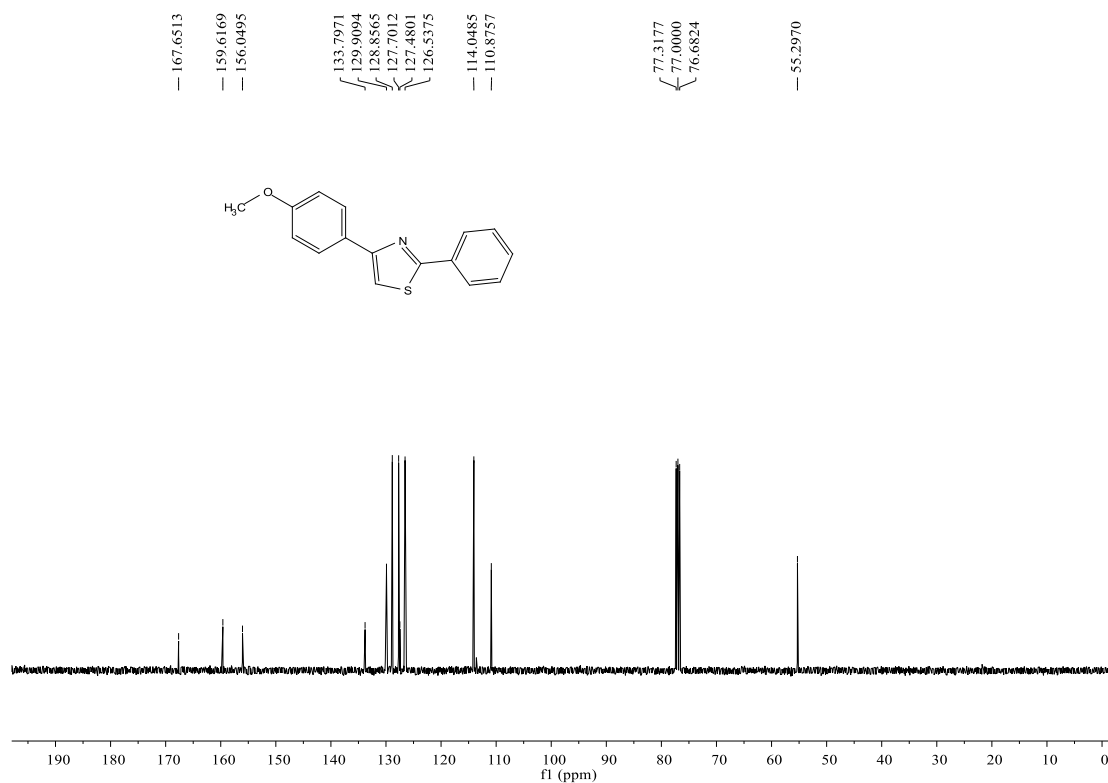

$^1\text{H}$ ,  $^{13}\text{C}$  and  $^{19}\text{F}$  NMR spectra of **3ag**

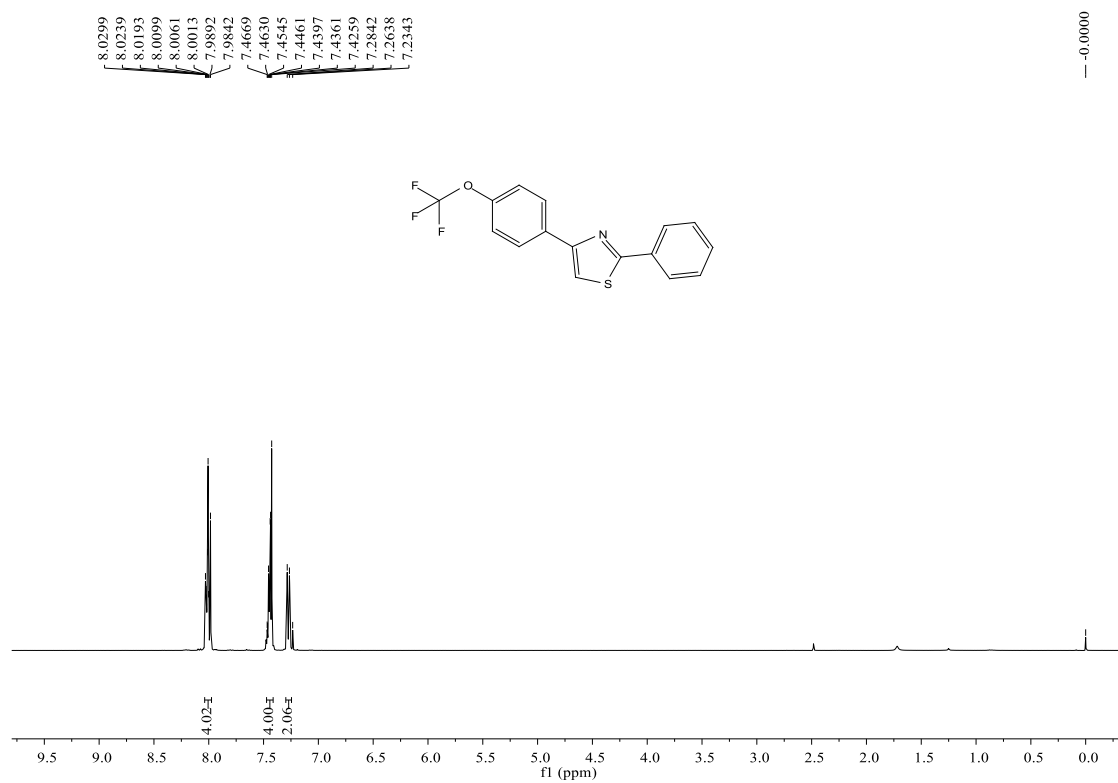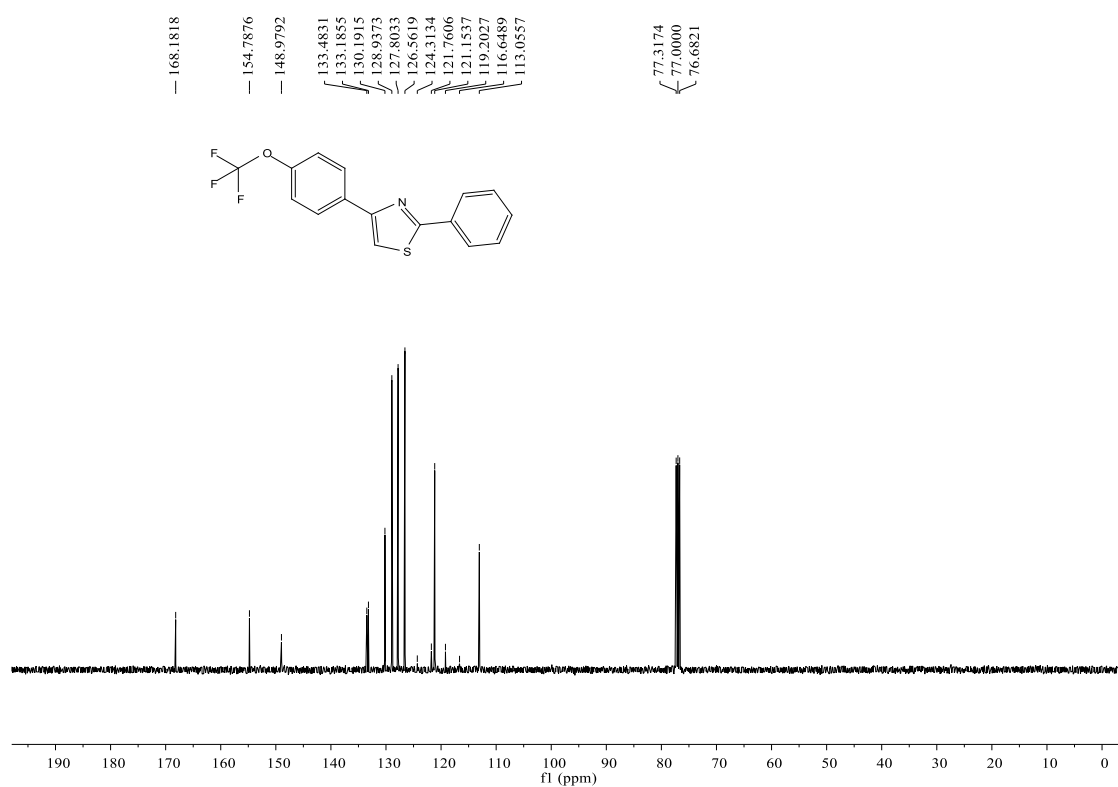

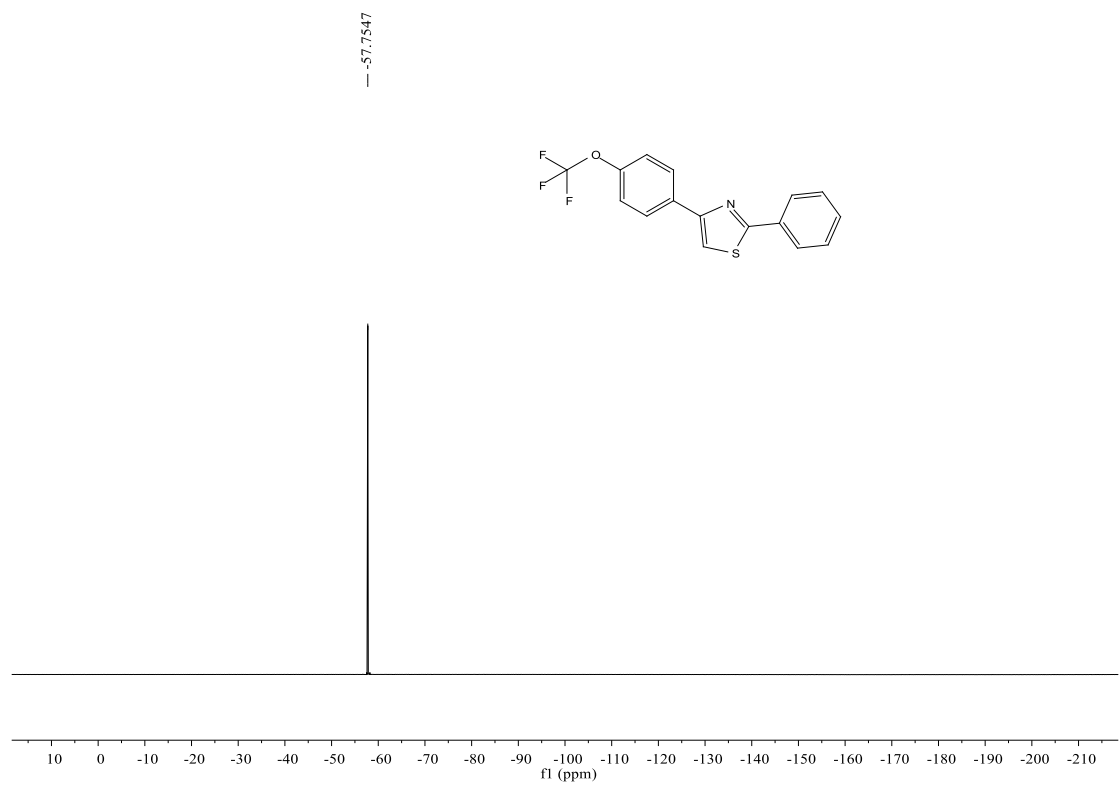

<sup>1</sup>H and <sup>13</sup>C NMR spectra of **3ah**

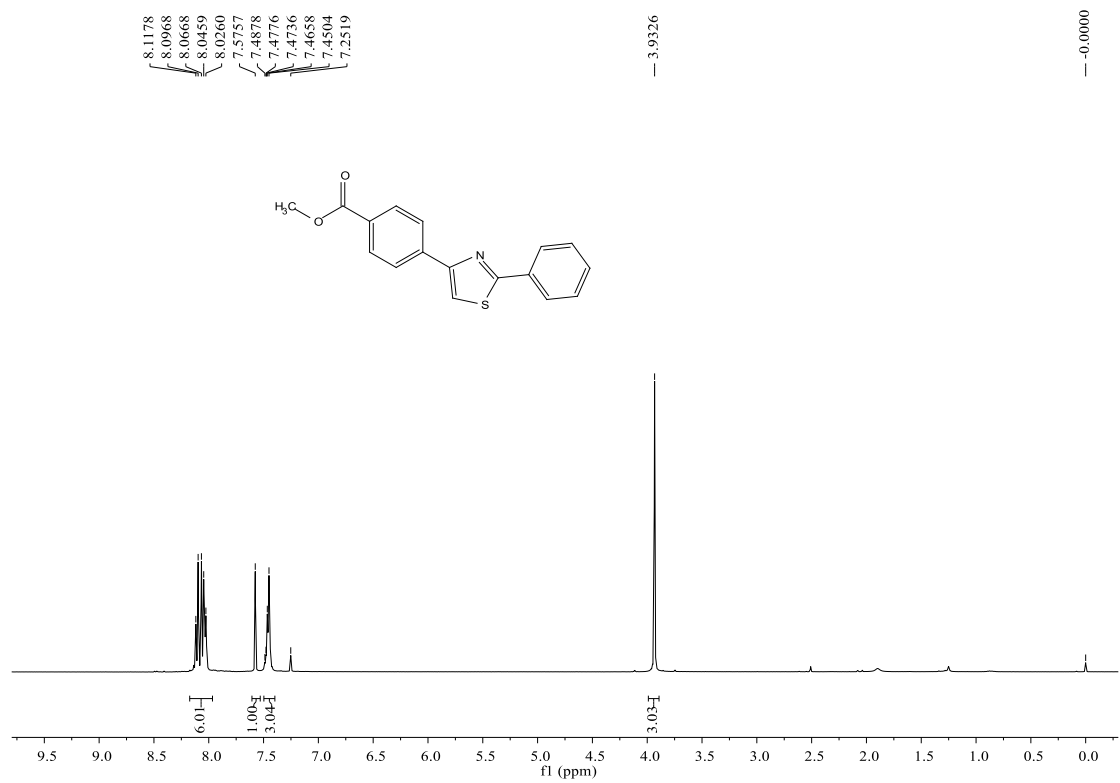



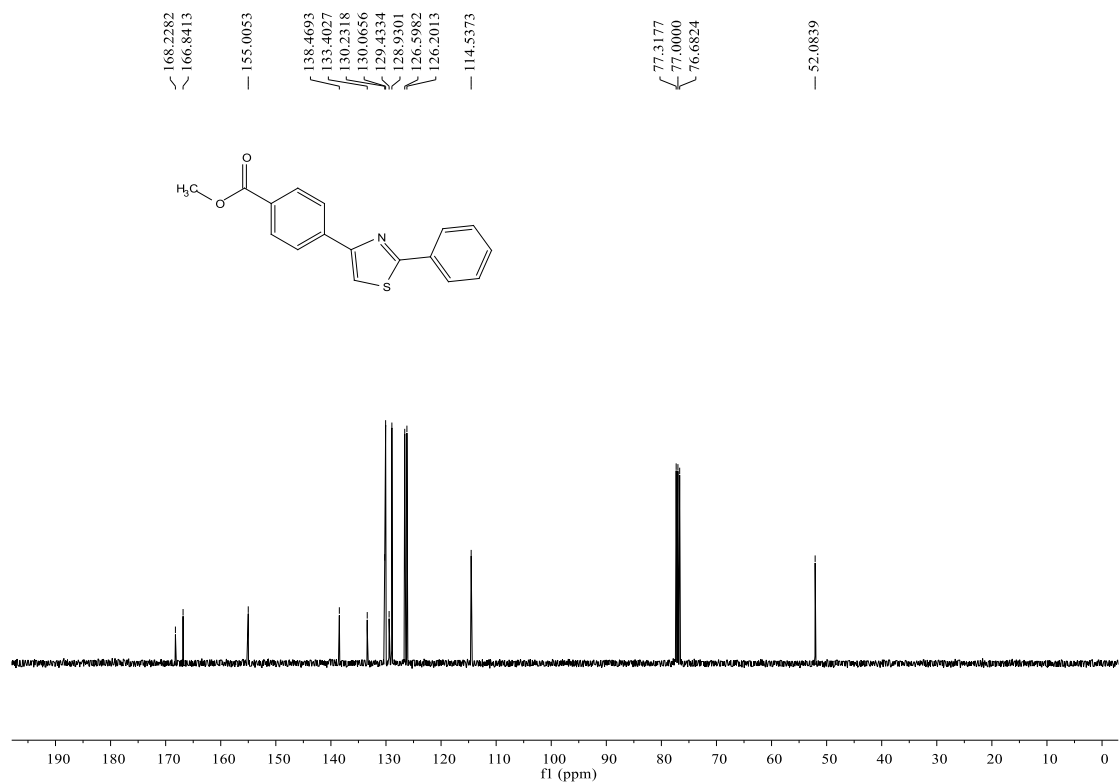

<sup>1</sup>H, <sup>13</sup>C and <sup>19</sup>F NMR spectra of **3ai**

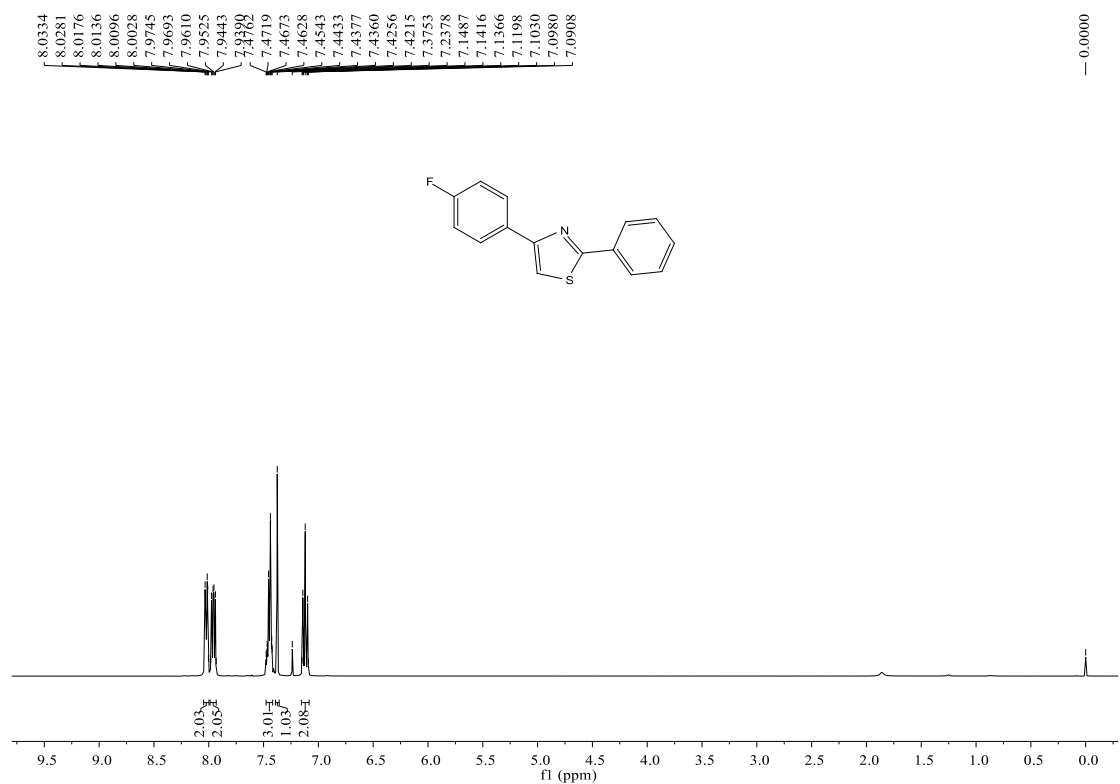

$\sim$  168.0042  
 $\sim$  163.9500  
 $\sim$  161.4912  
 $\sim$  155.1945  
  
 $\sim$  133.5671  
 $\sim$  130.7466  
 $\sim$  130.7153  
 $\sim$  130.1006  
 $\sim$  128.9096  
 $\sim$  128.1806  
 $\sim$  128.0999  
 $\sim$  126.5520  
 $\sim$  115.7023  
 $\sim$  115.4871  
 $\sim$  112.1572  
  
 $\sim$  77.3174  
 $\sim$  77.0000  
 $\sim$  76.6823

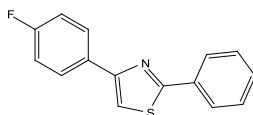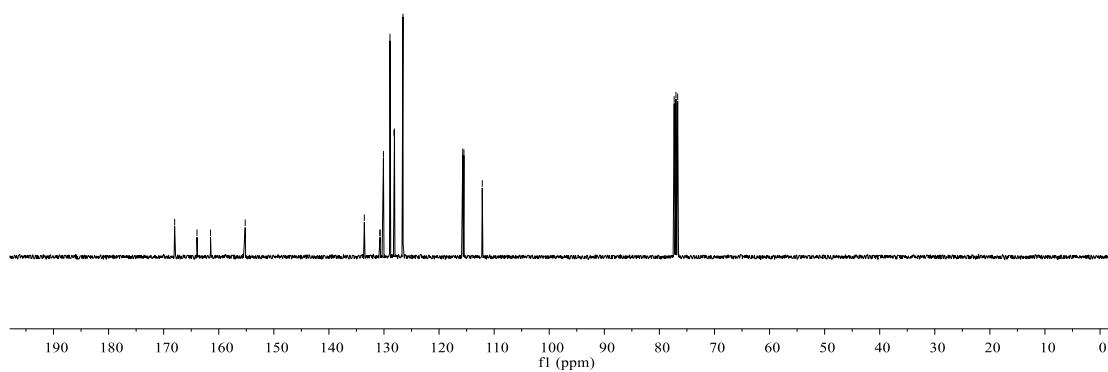

— -113.7394

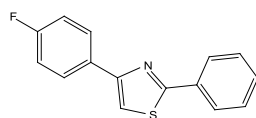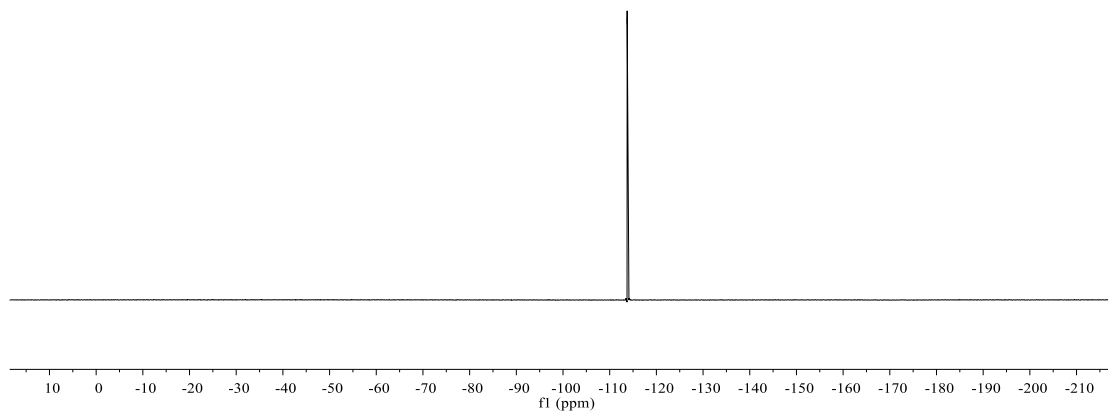

$^1\text{H}$  and  $^{13}\text{C}$  NMR spectra of **3aj**

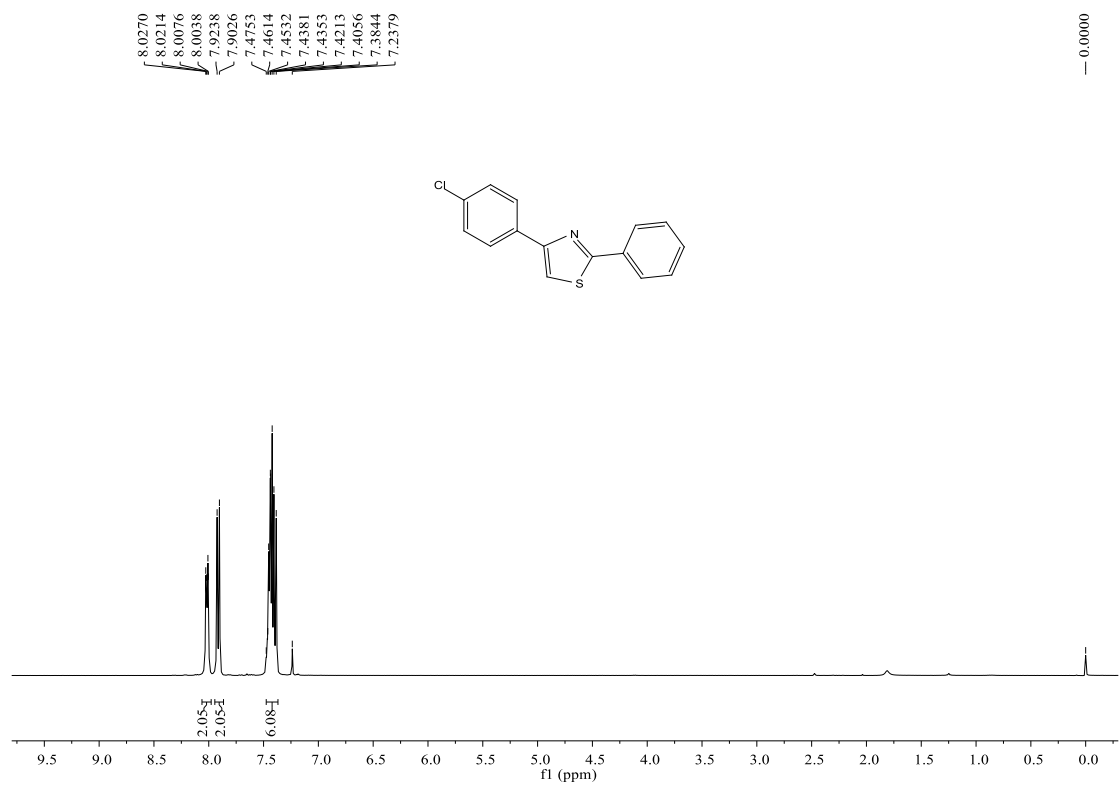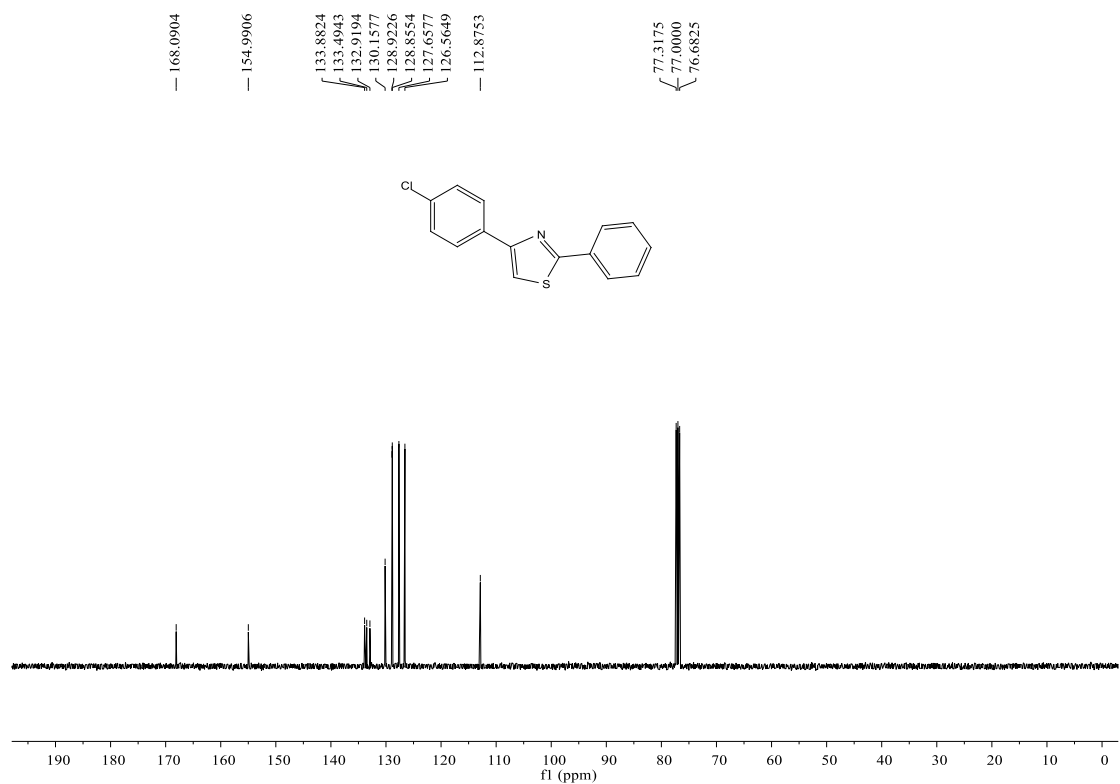

$^1\text{H}$  and  $^{13}\text{C}$  NMR spectra of **3ak**

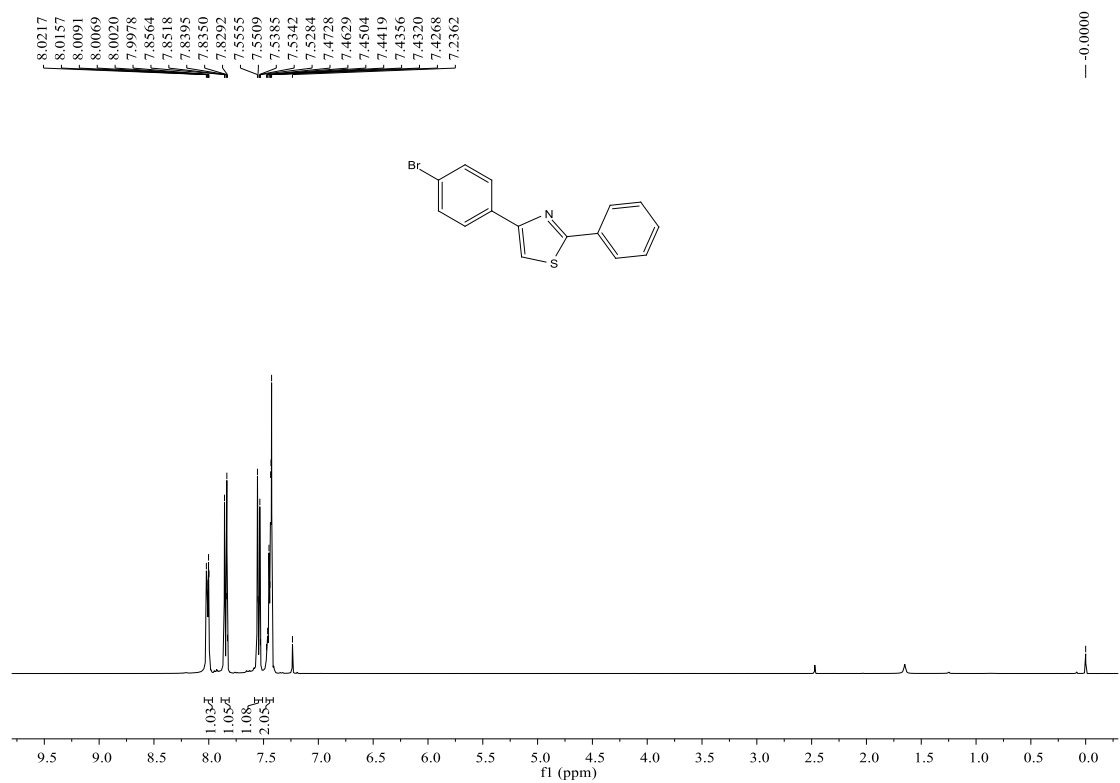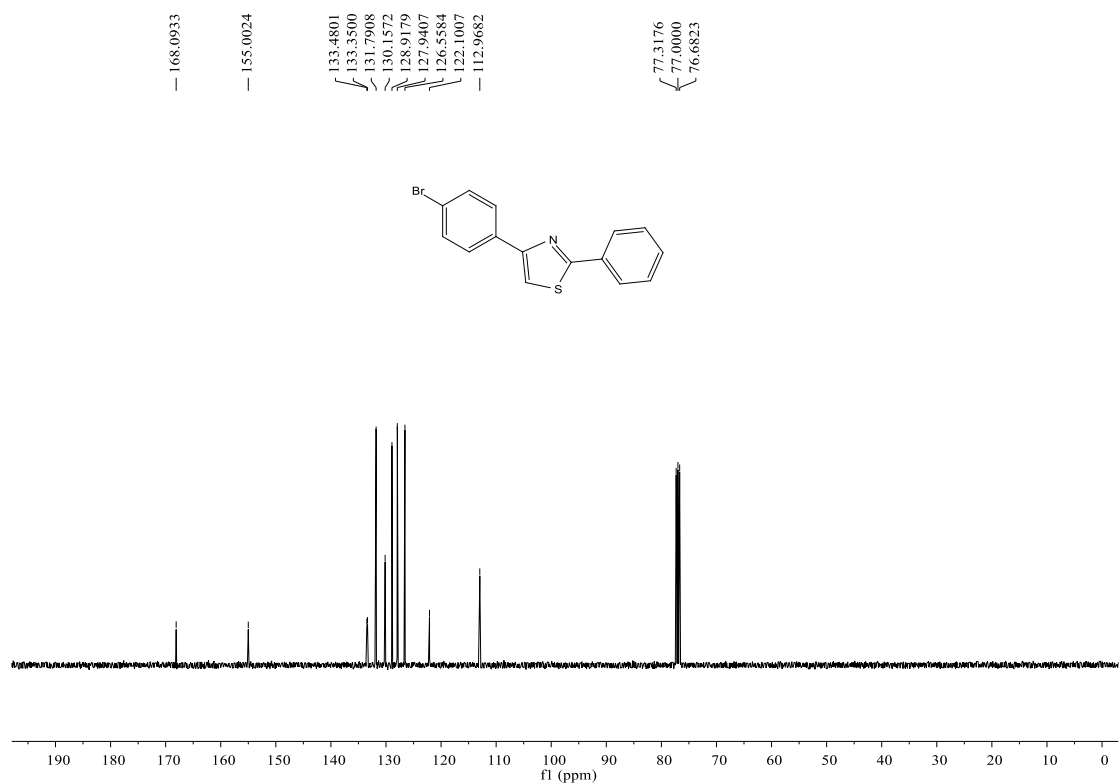

$^1\text{H}$  and  $^{13}\text{C}$  NMR spectra of **3al**

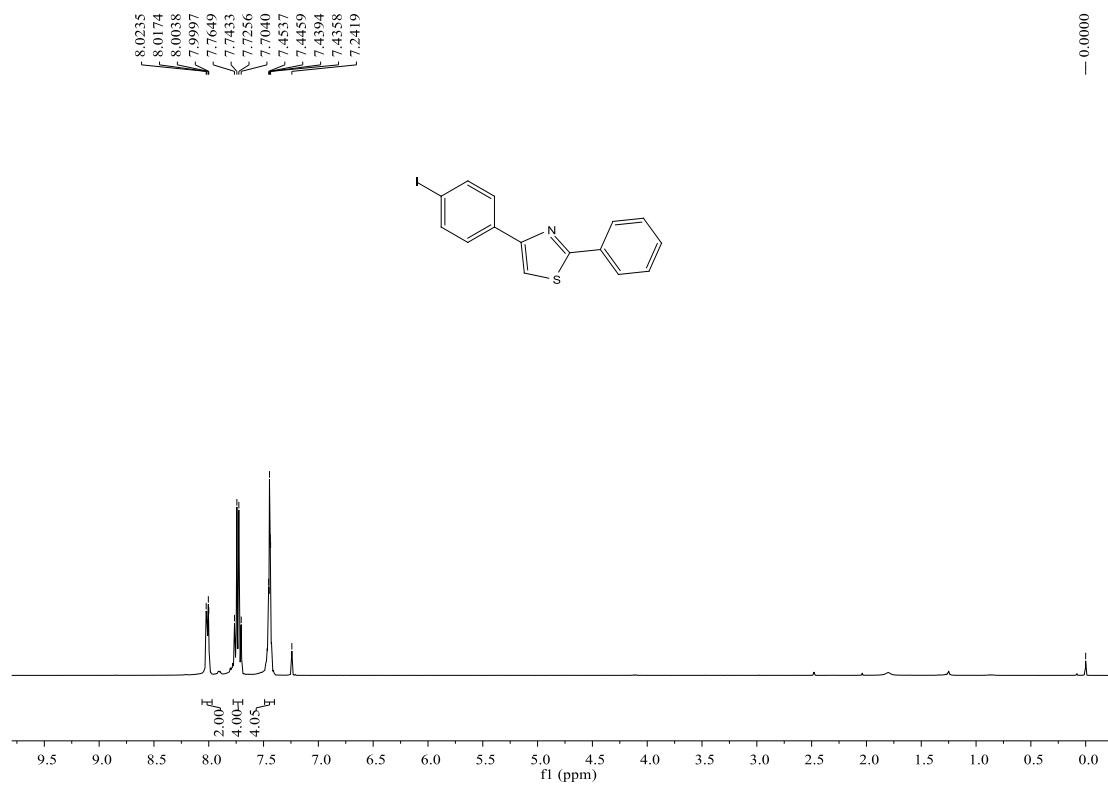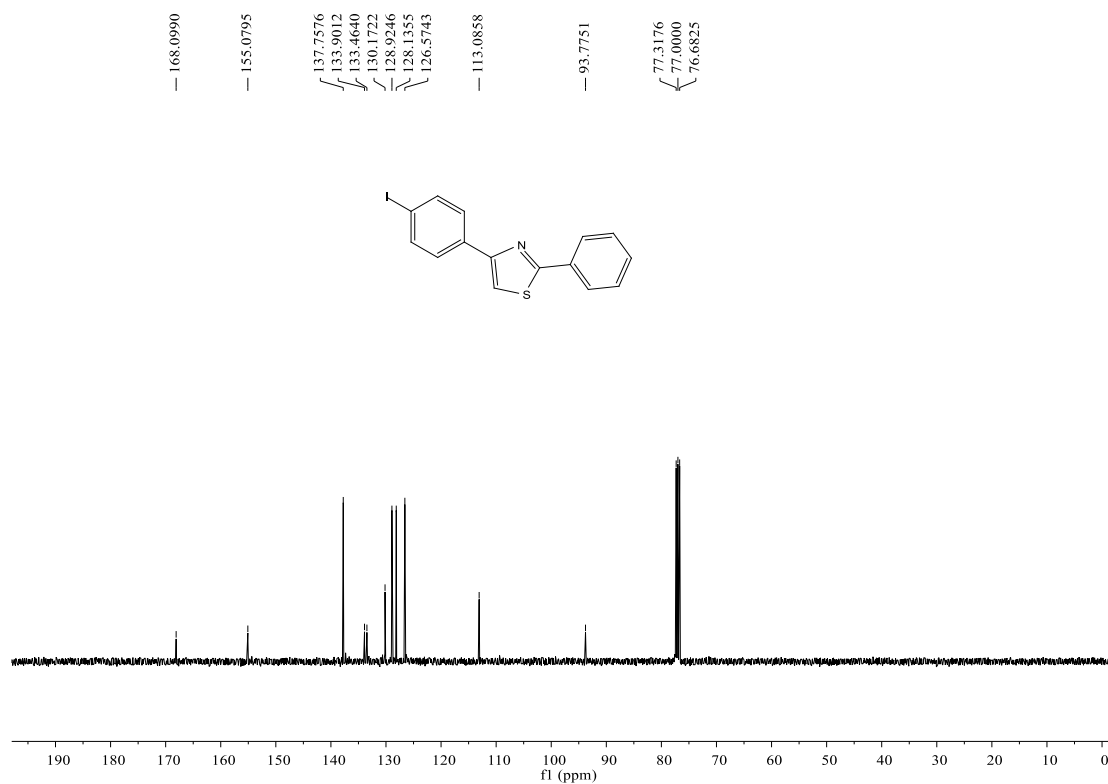

$^1\text{H}$  and  $^{13}\text{C}$  NMR spectra of **3am**

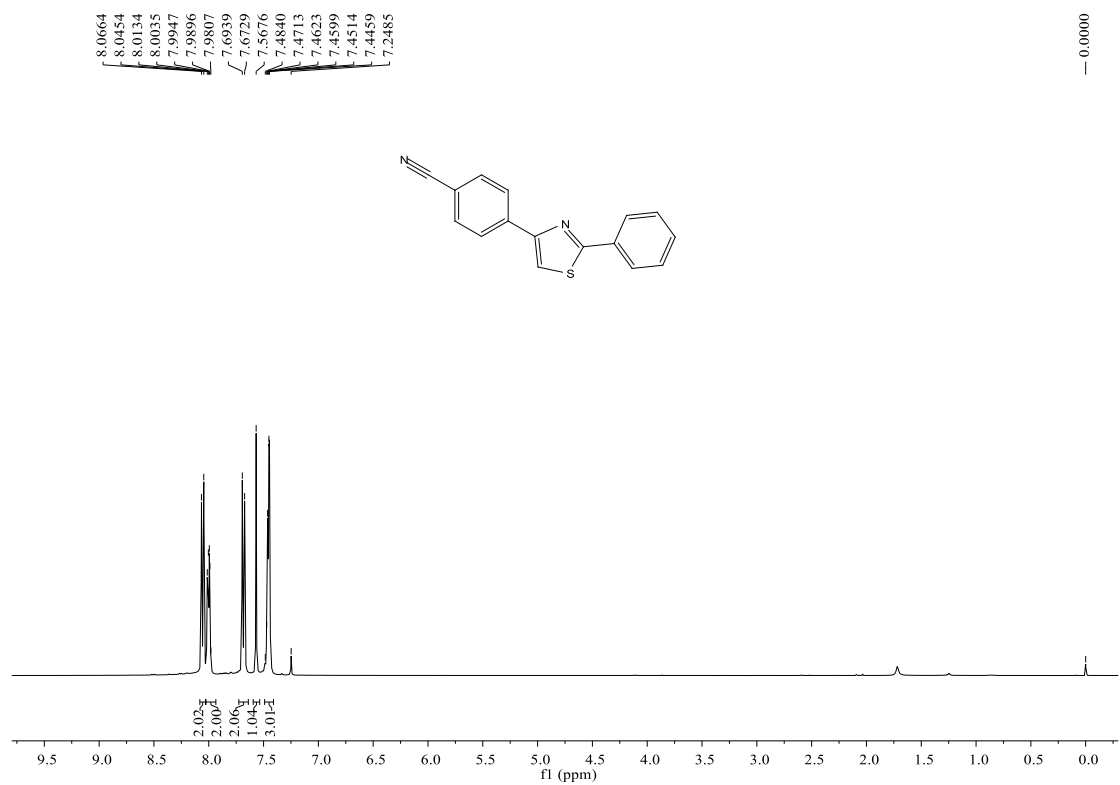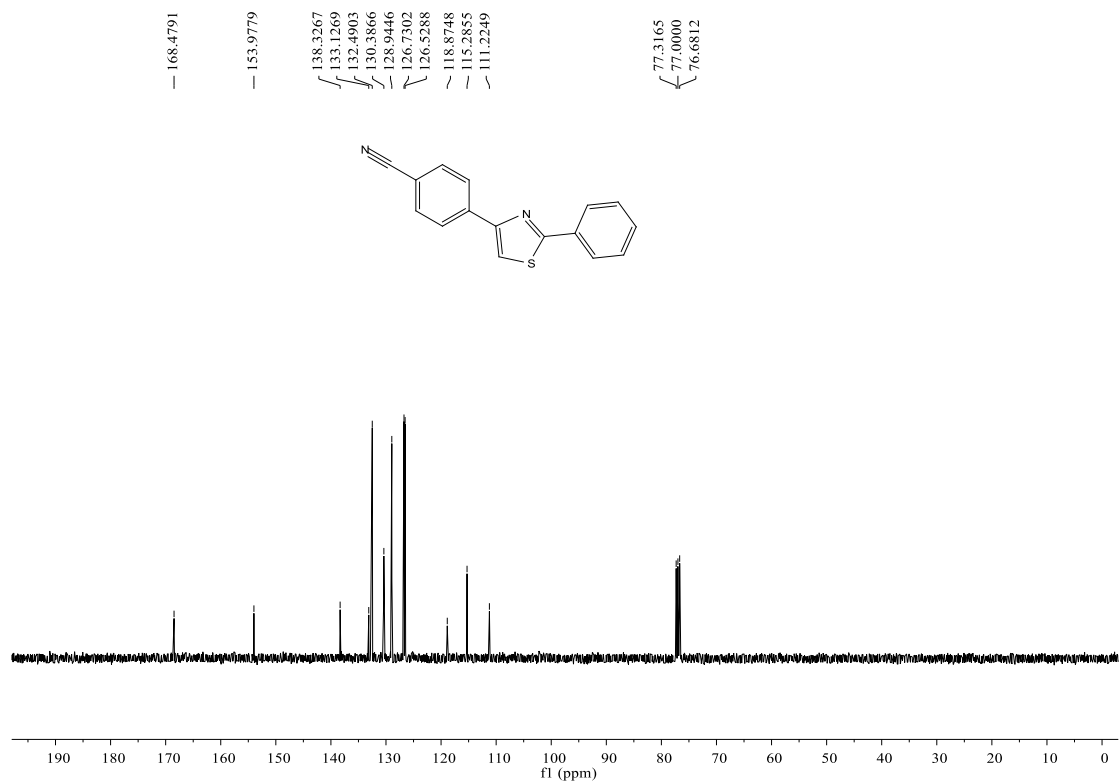

$^1\text{H}$  and  $^{13}\text{C}$  NMR spectra of **3an**

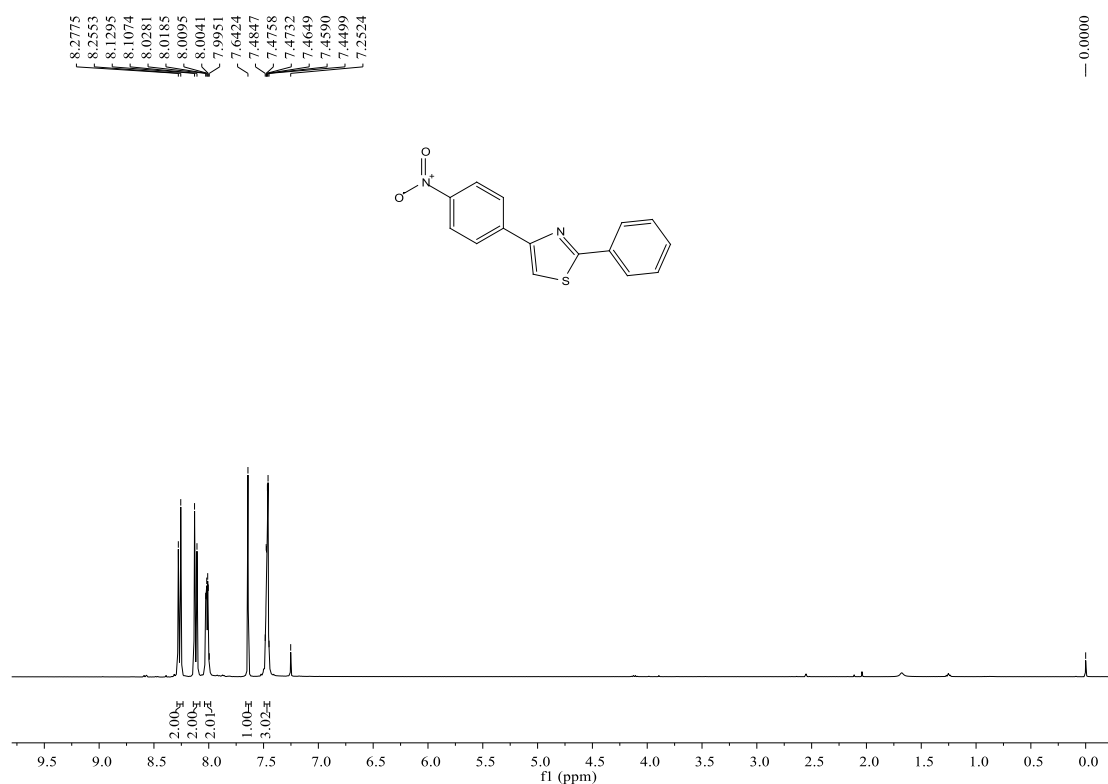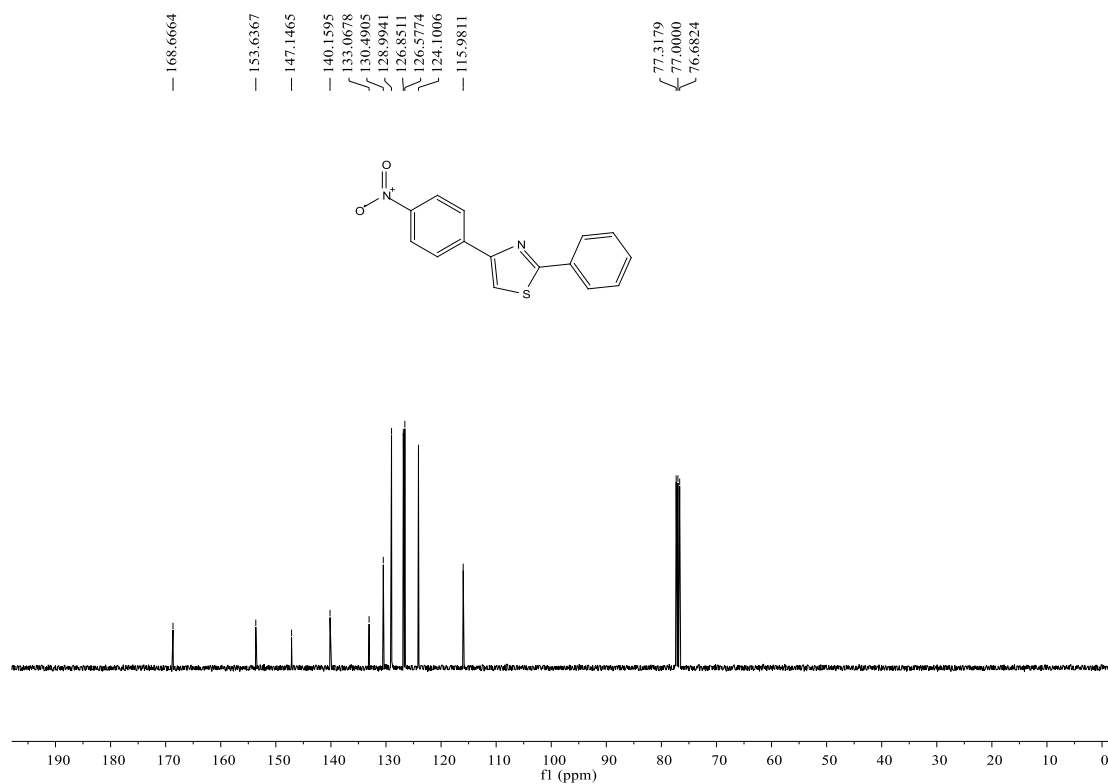

$^1\text{H}$  and  $^{13}\text{C}$  NMR spectra of **3ao**

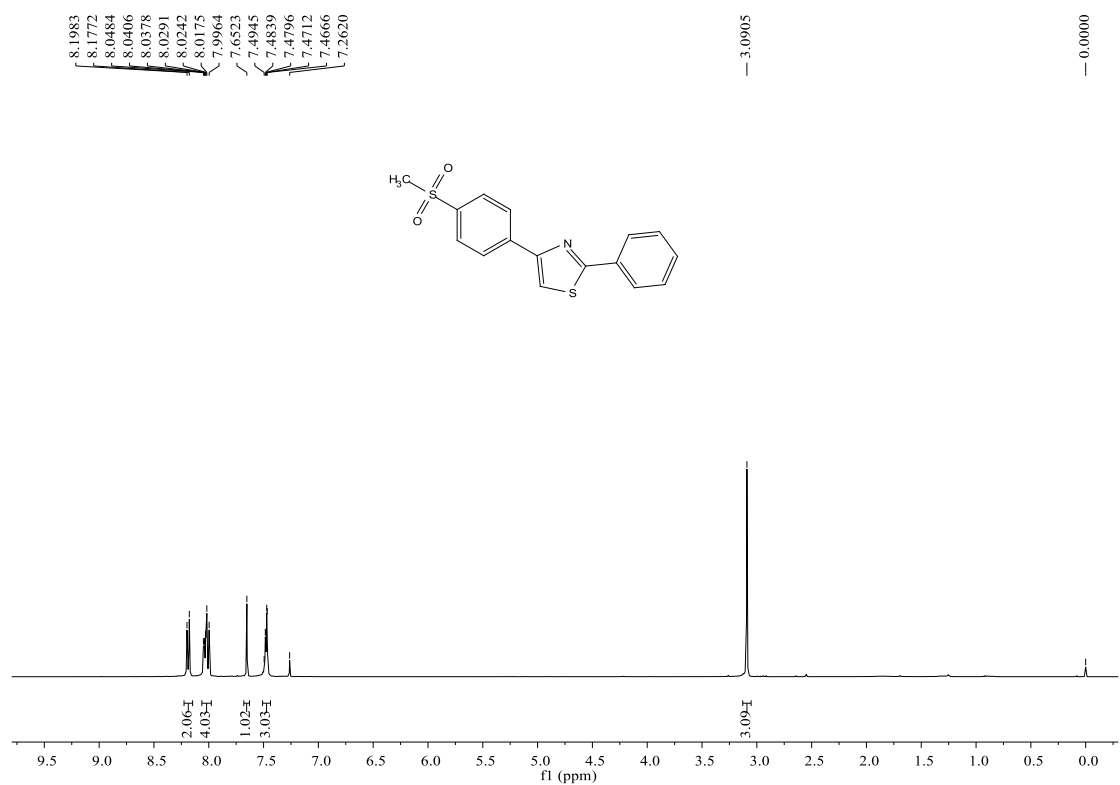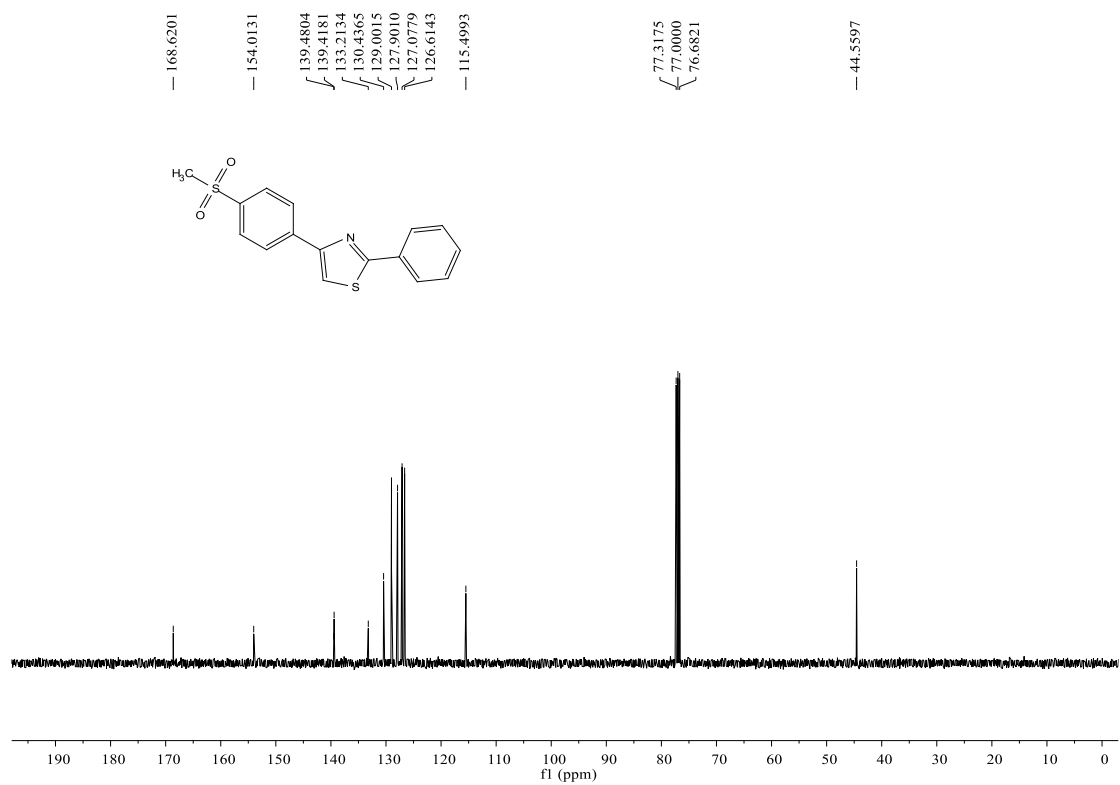



$^1\text{H}$  and  $^{13}\text{C}$  NMR spectra of **3ap**

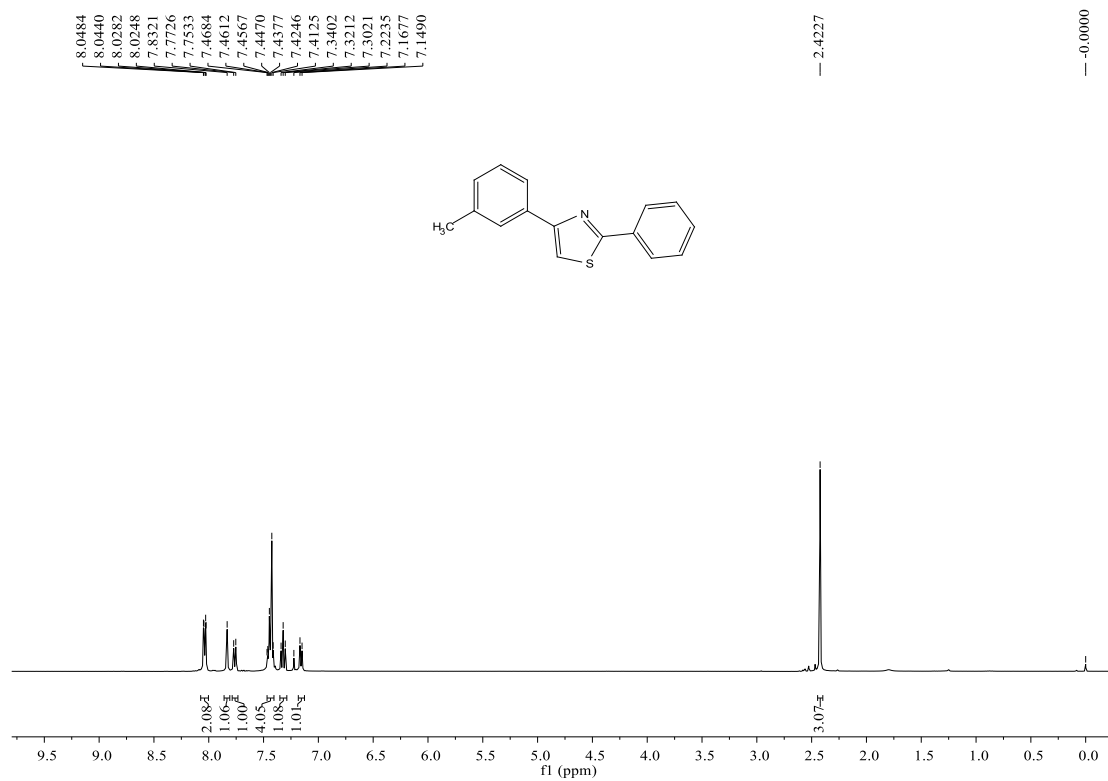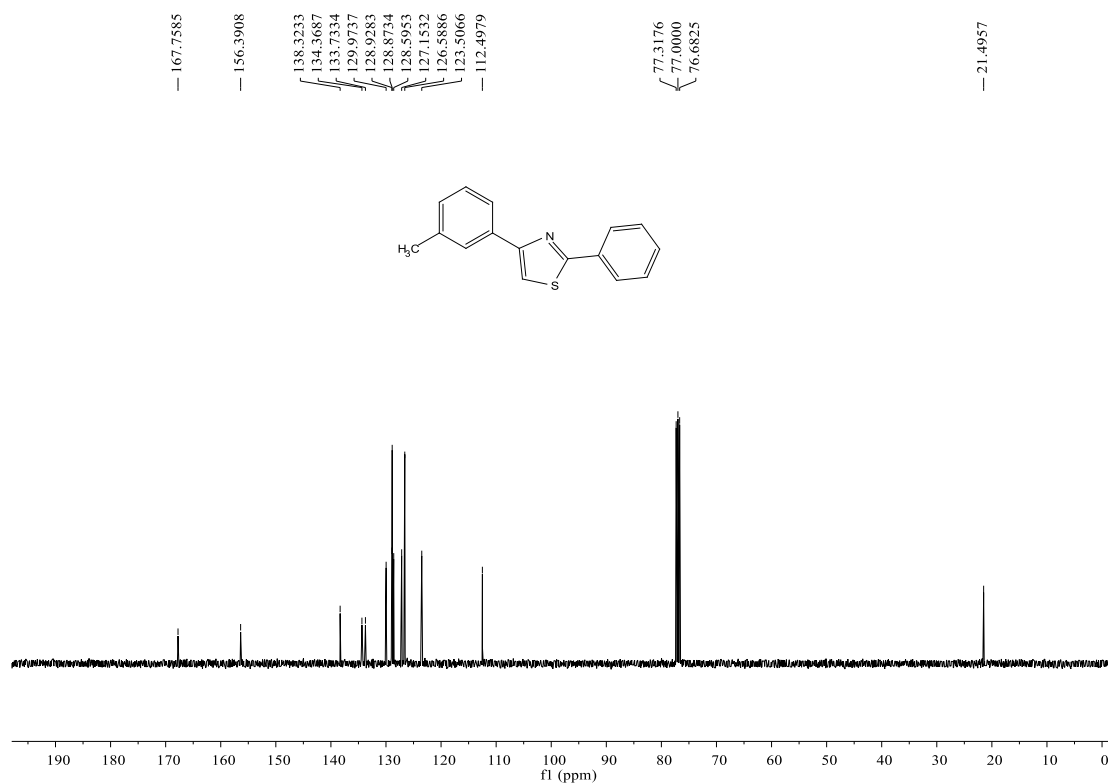

$^1\text{H}$ ,  $^{13}\text{C}$  and  $^{19}\text{F}$  NMR spectra of **3aq**

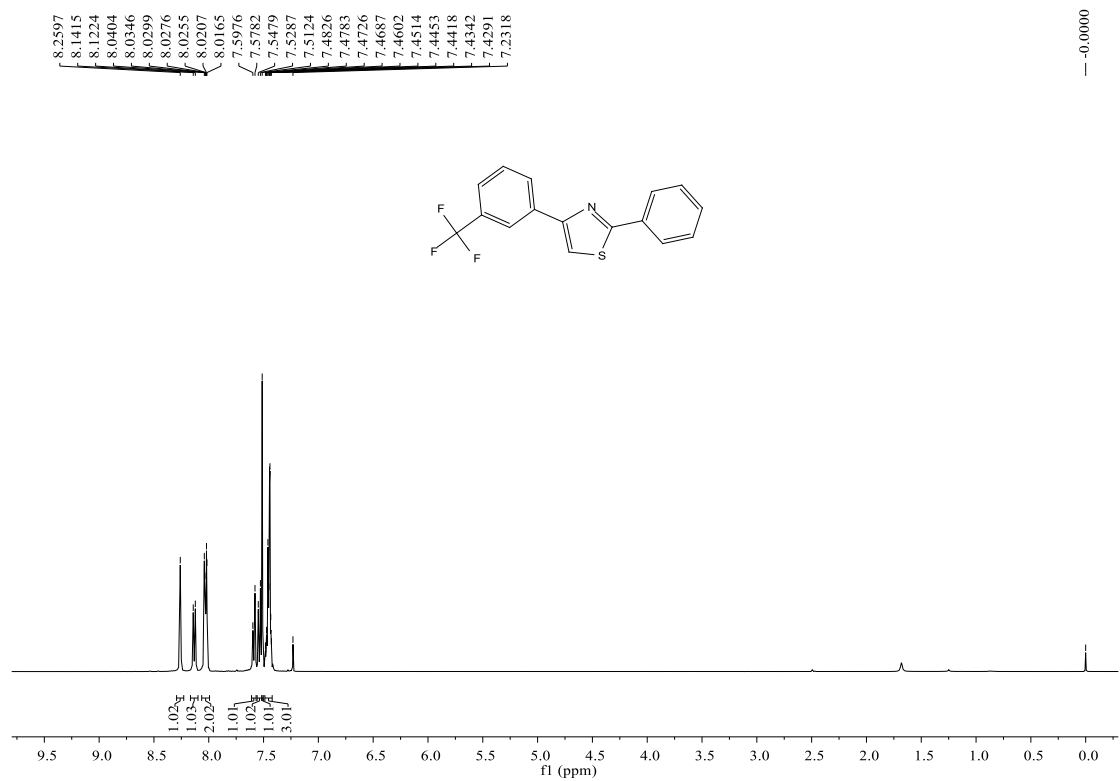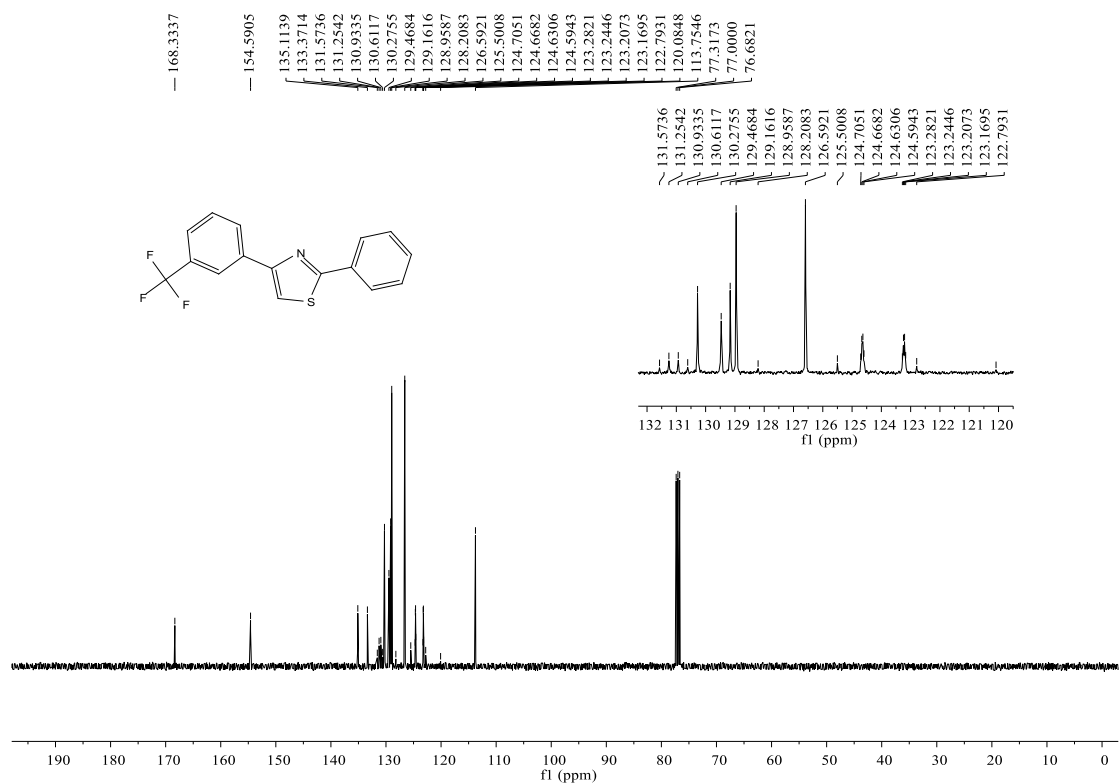

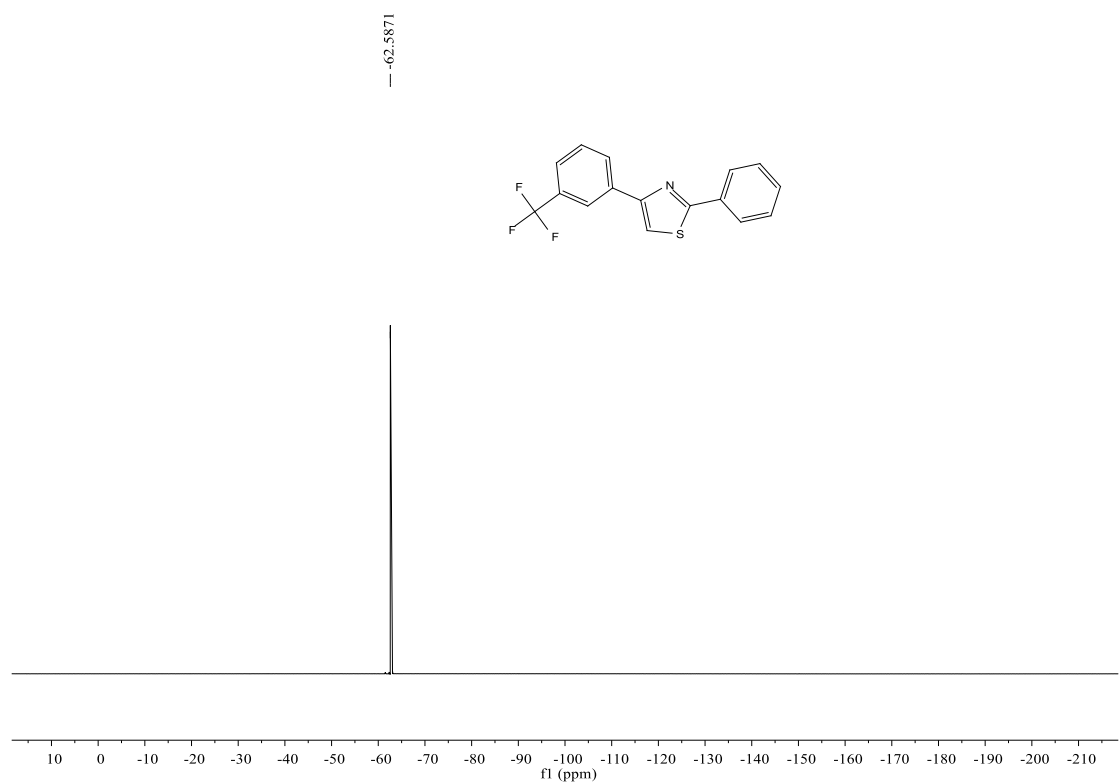

$^1\text{H}$ ,  $^{13}\text{C}$  and  $^{19}\text{F}$  NMR spectra of **3ar**

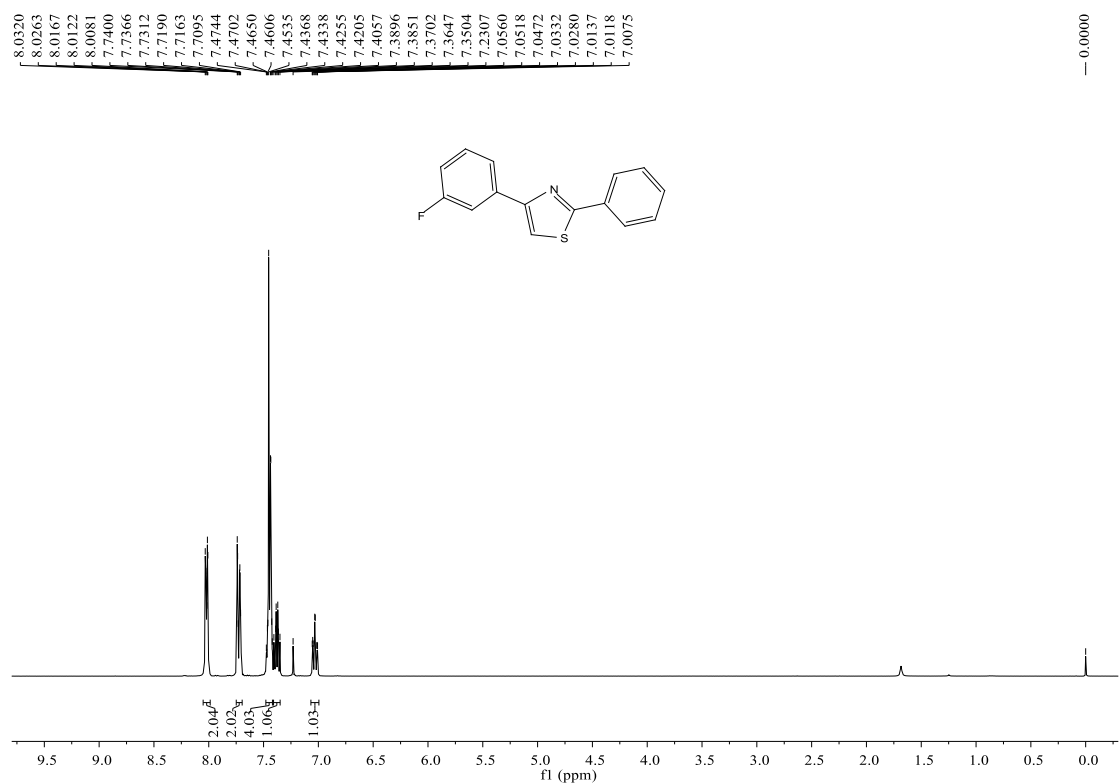

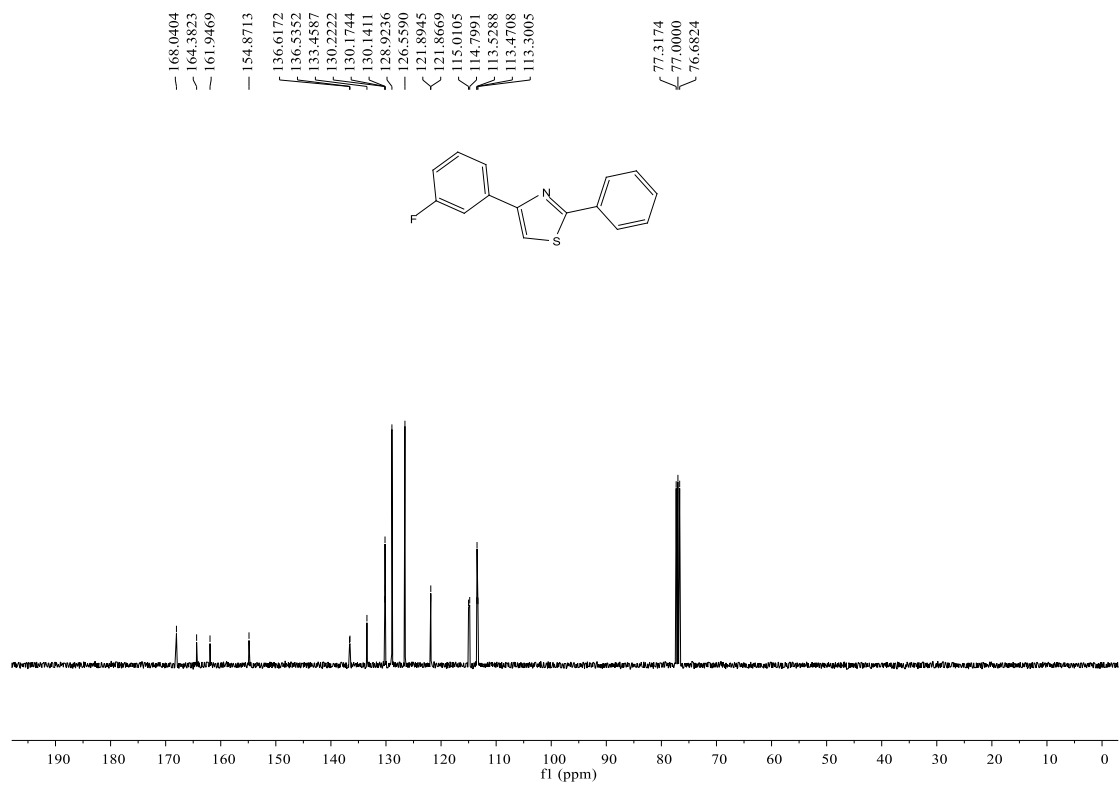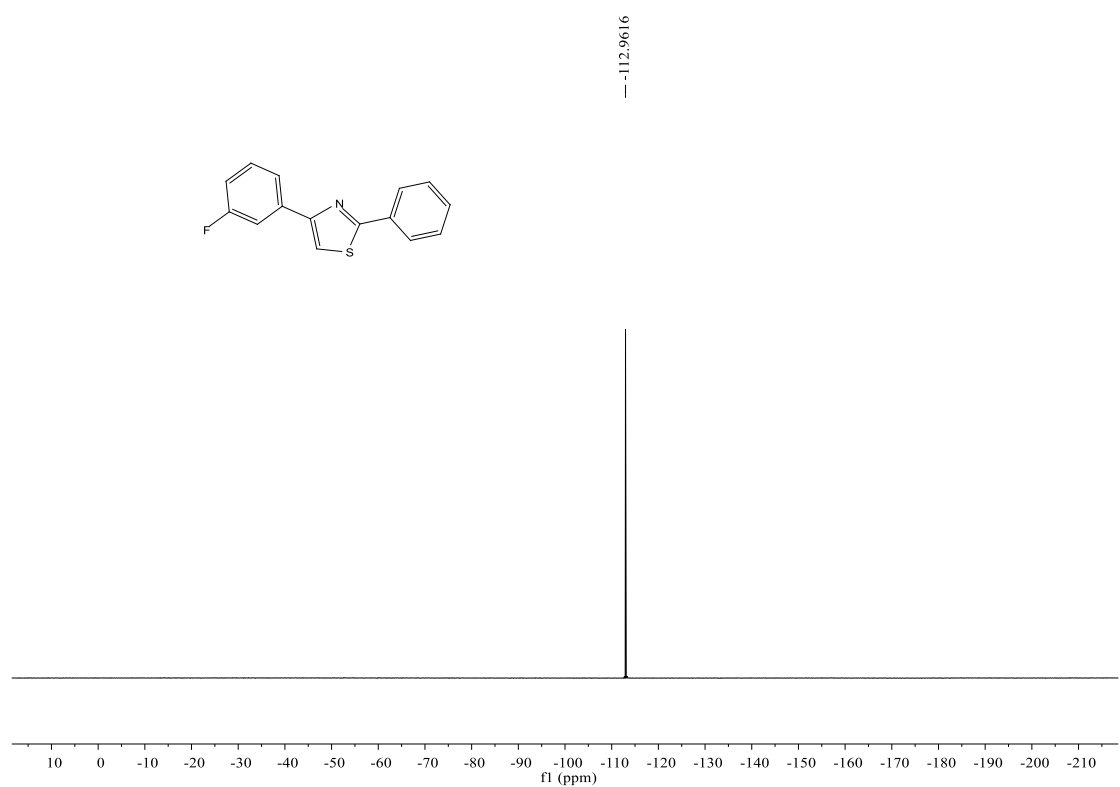

$^1\text{H}$  and  $^{13}\text{C}$  NMR spectra of **3as**

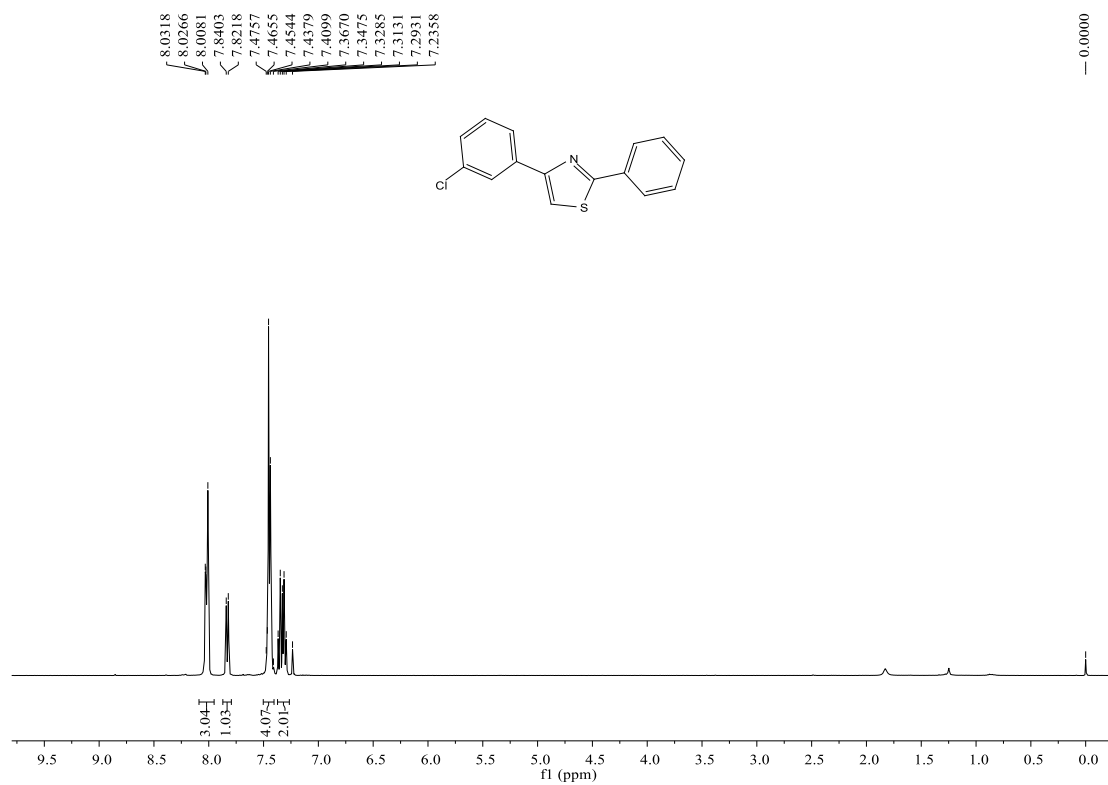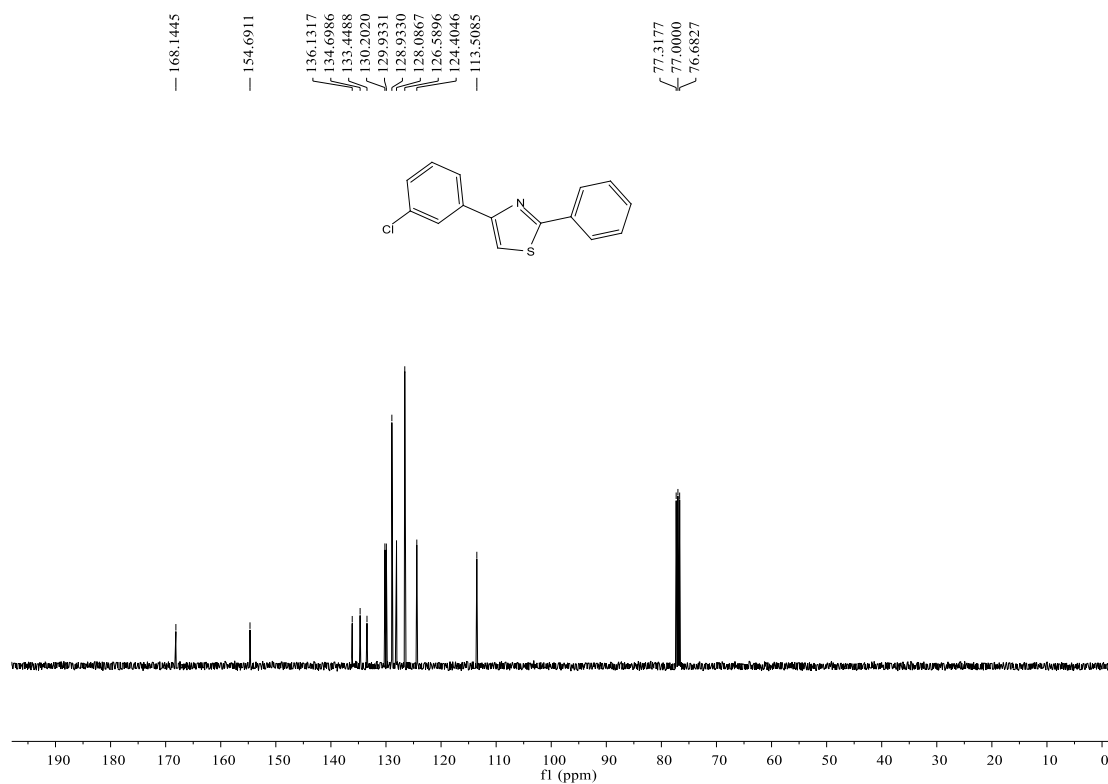

$^1\text{H}$  and  $^{13}\text{C}$  NMR spectra of **3at**

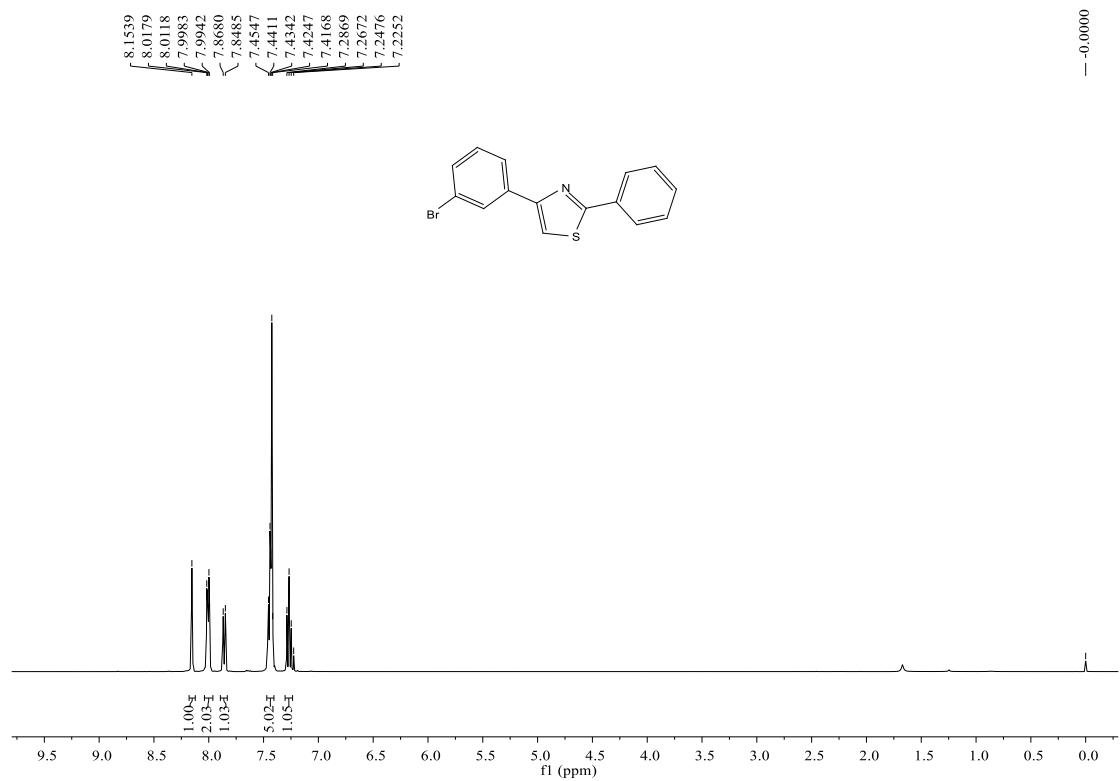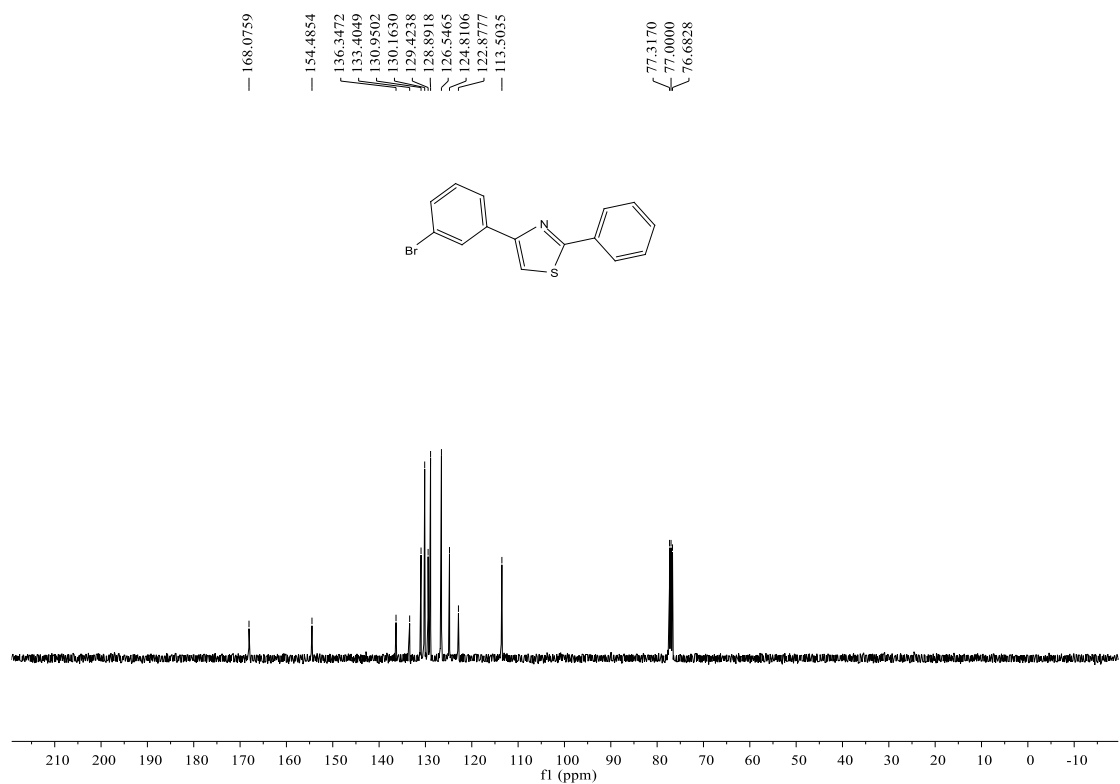

$^1\text{H}$  and  $^{13}\text{C}$  NMR spectra of **3au**

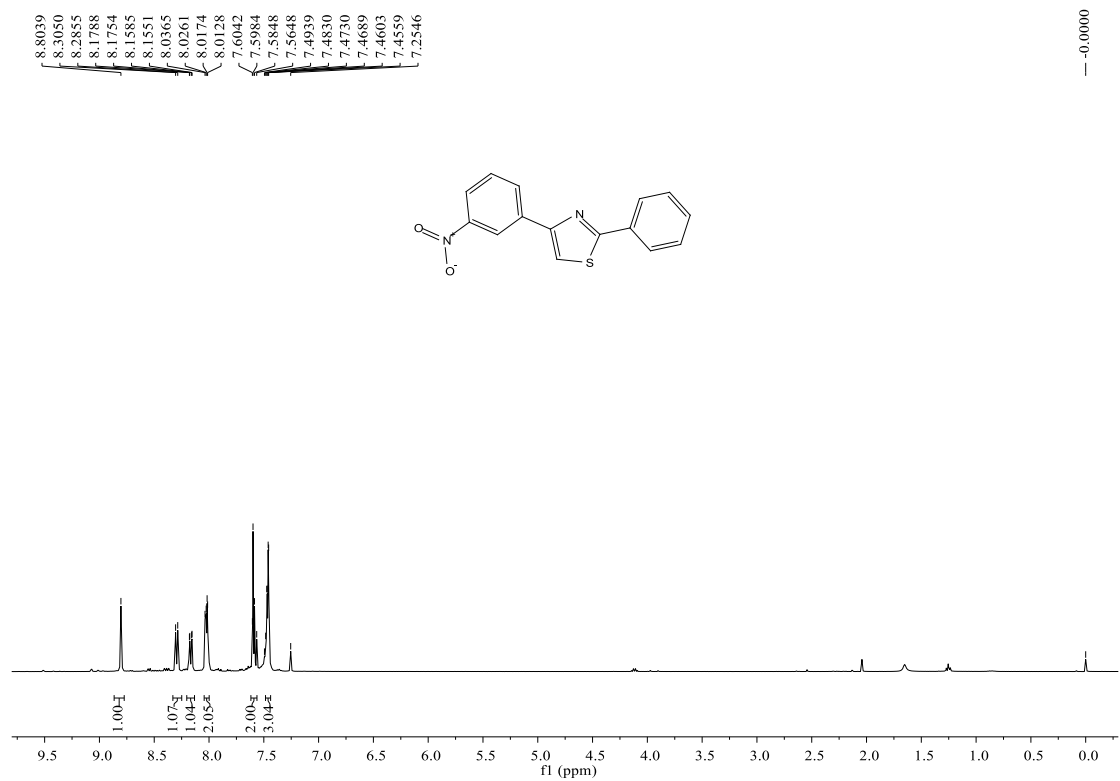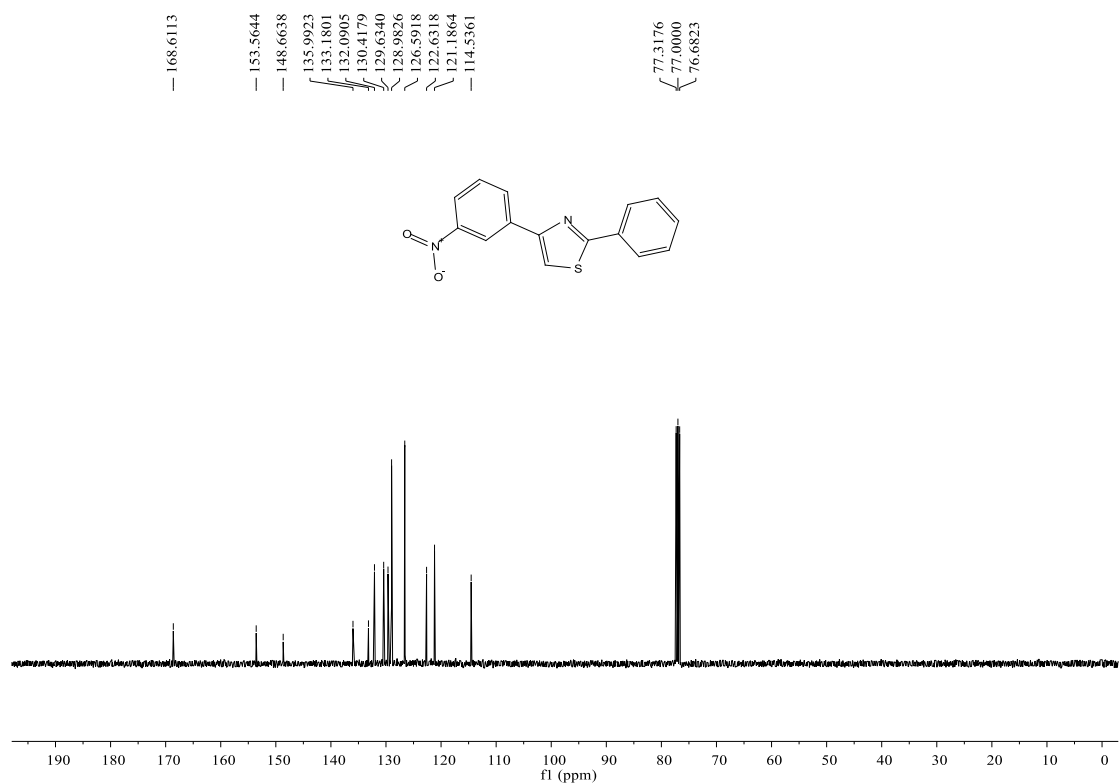

$^1\text{H}$ ,  $^{13}\text{C}$  and  $^{19}\text{F}$  NMR spectra of **3av**

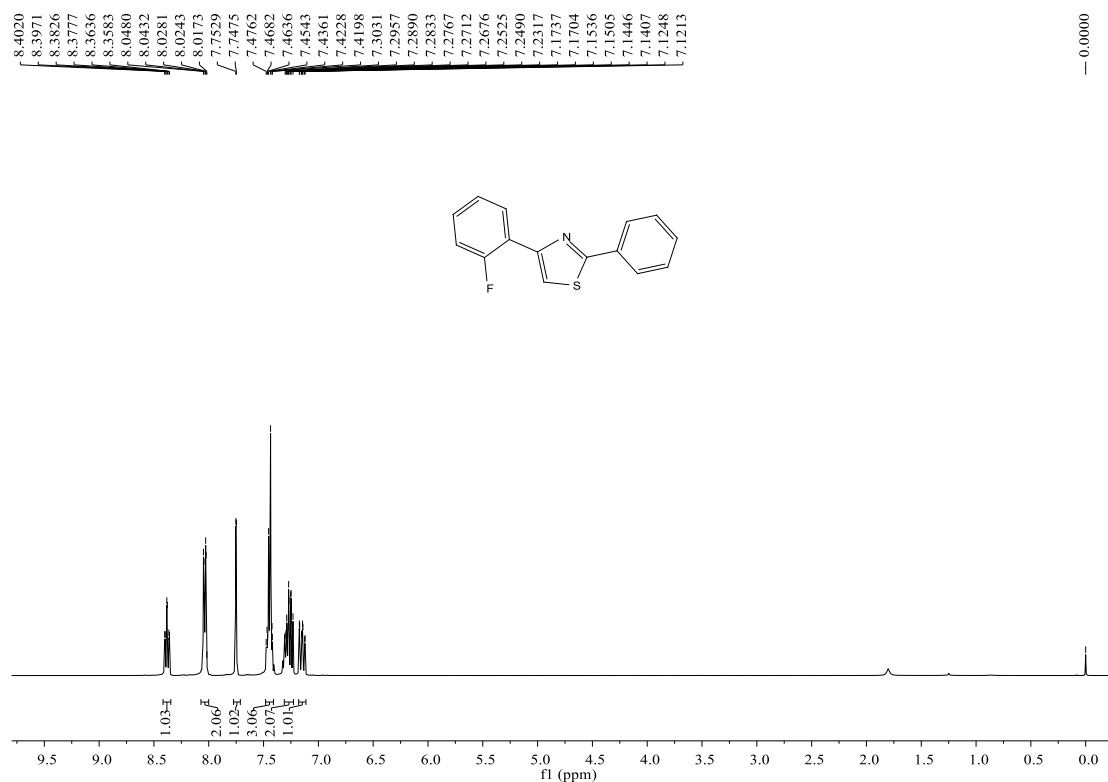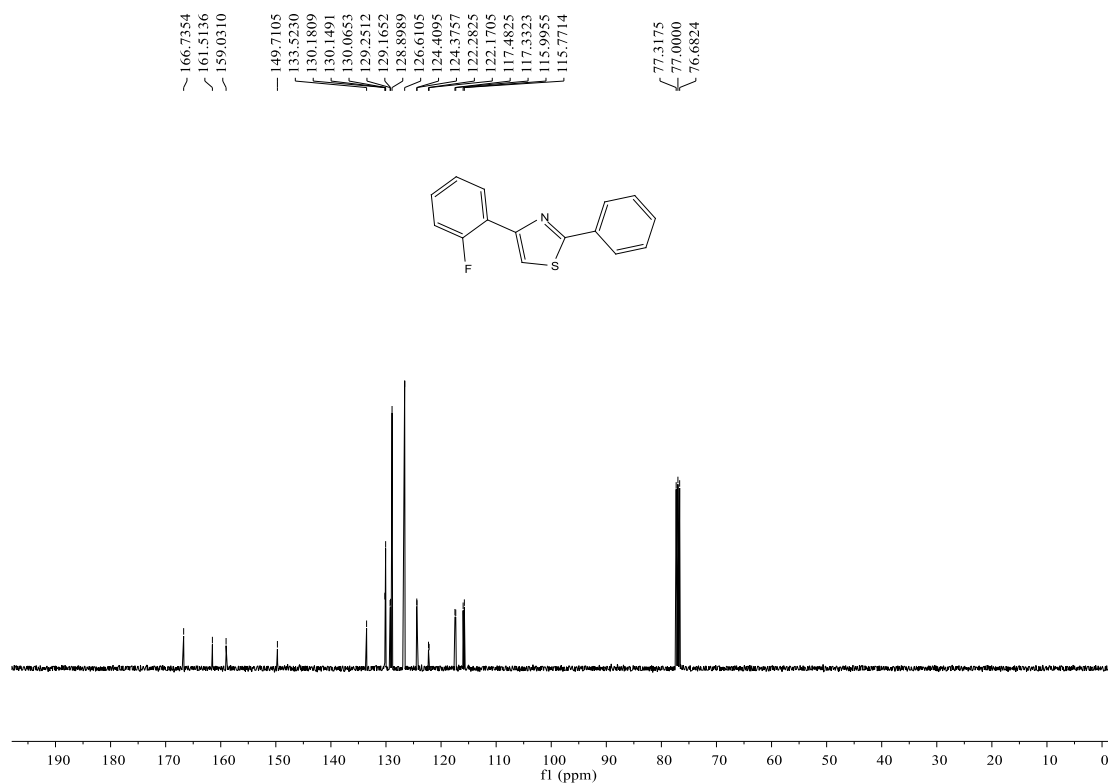



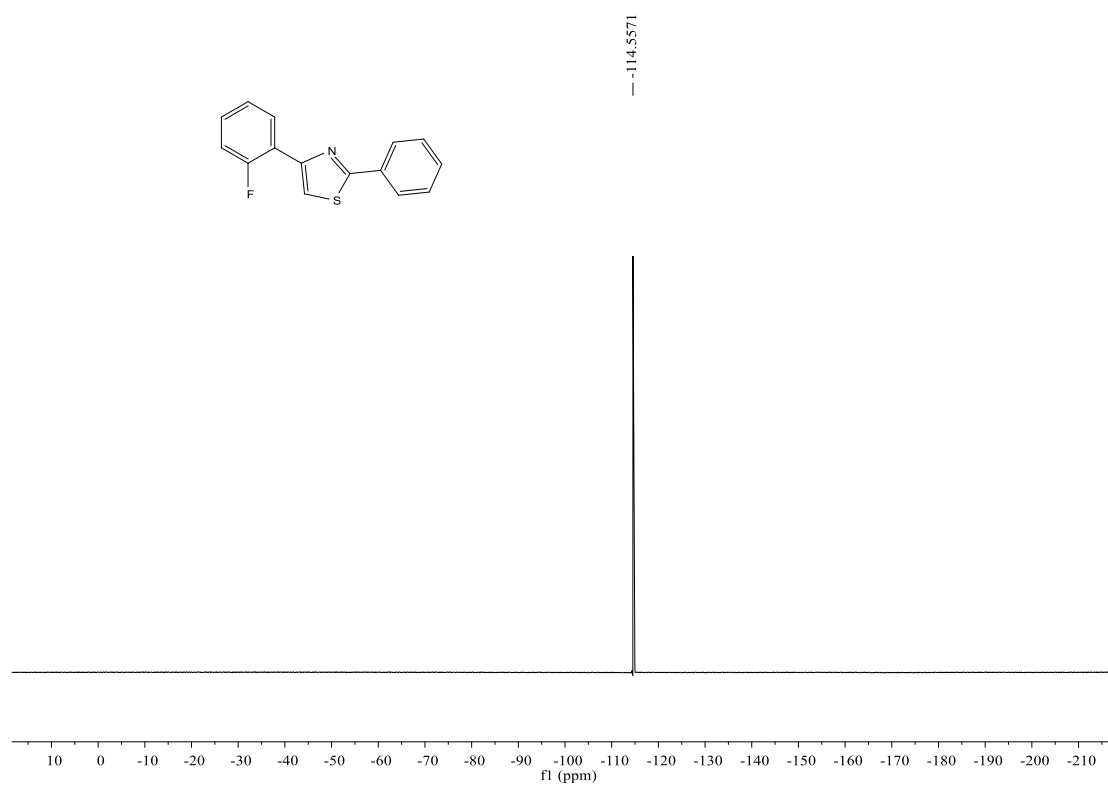

$^1\text{H}$  and  $^{13}\text{C}$  NMR spectra of **3aw**

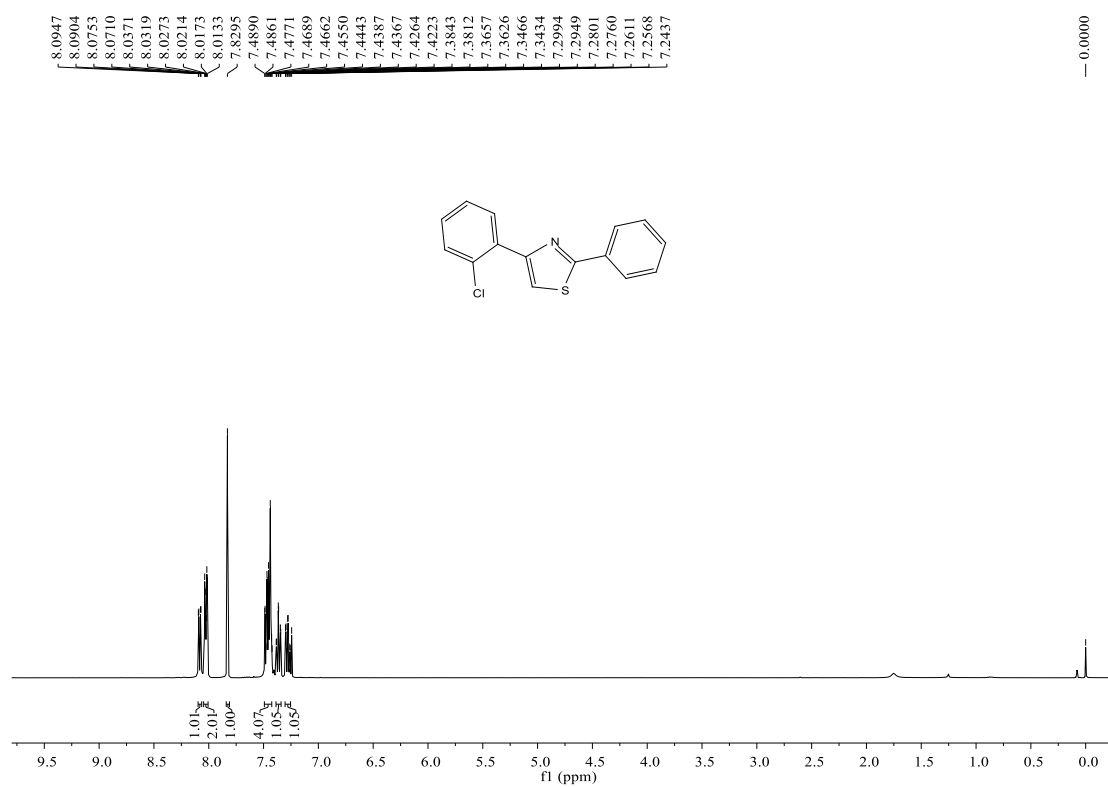

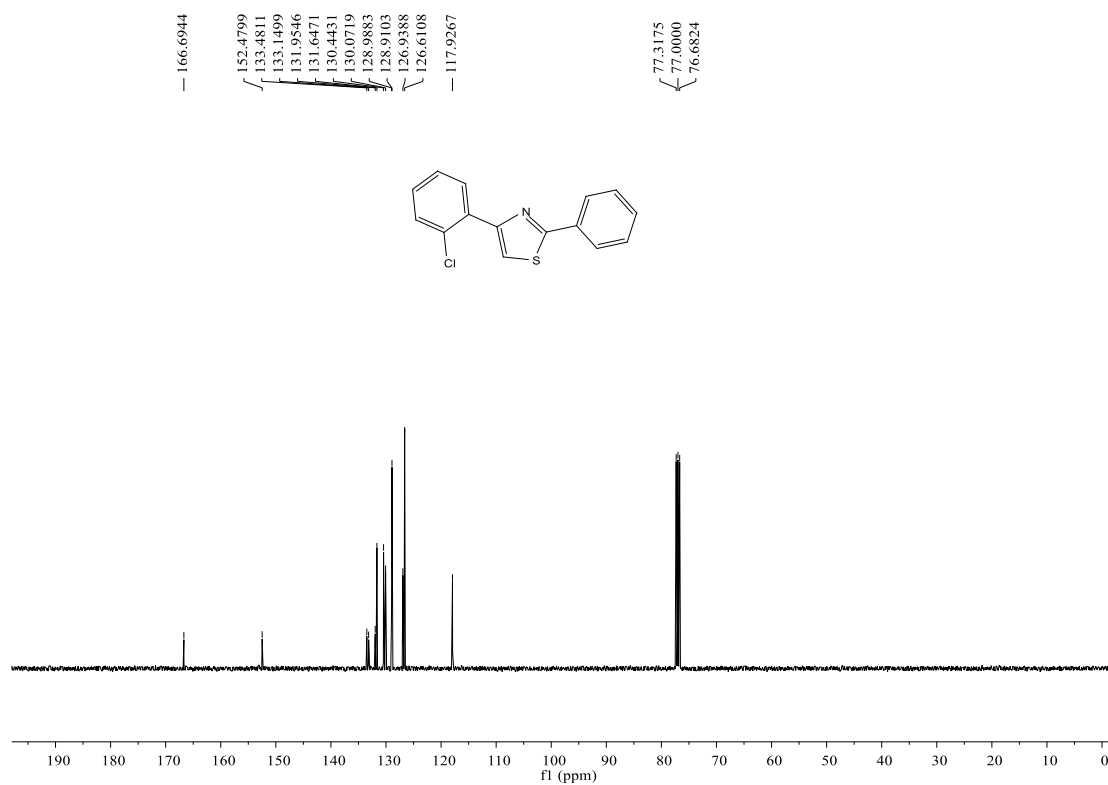

<sup>1</sup>H and <sup>13</sup>C NMR spectra of 3ax

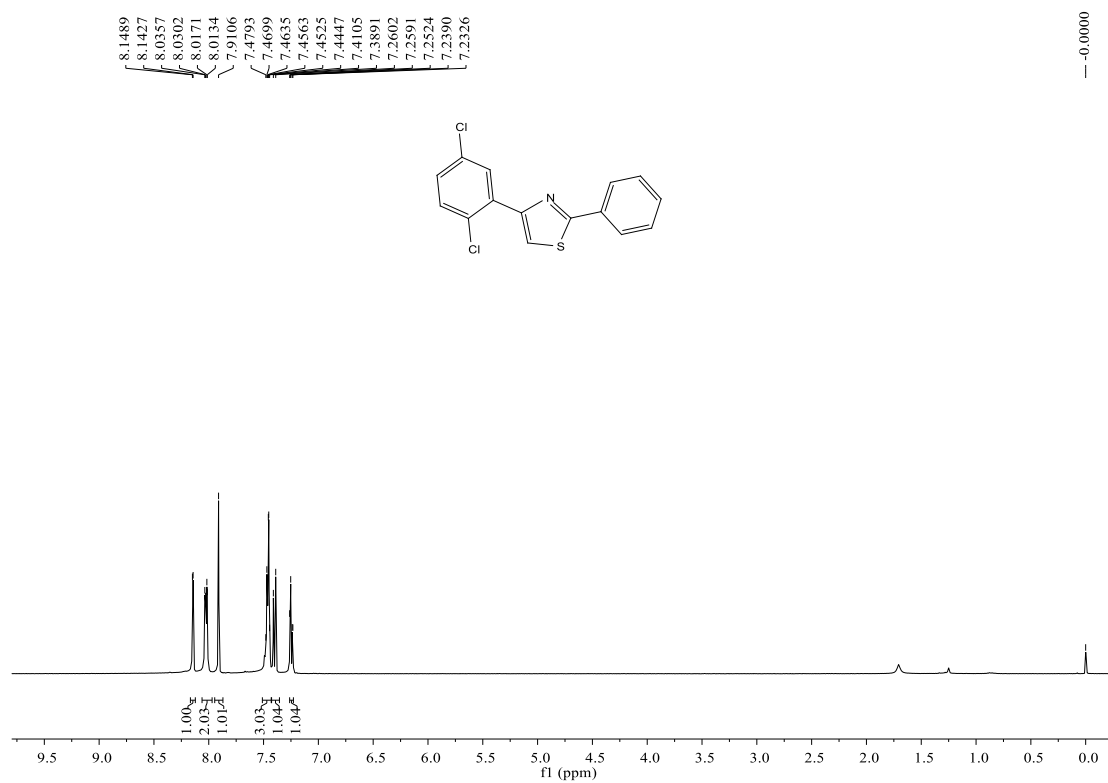

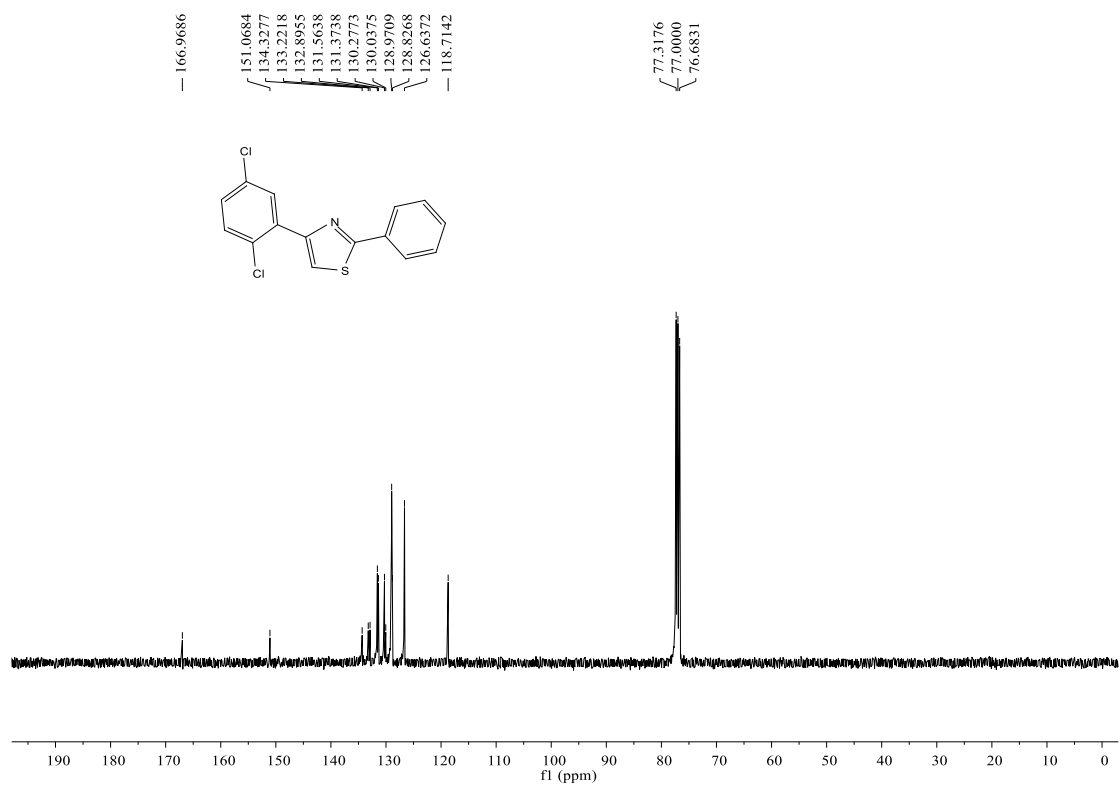

<sup>1</sup>H and <sup>13</sup>C NMR spectra of **3ay**

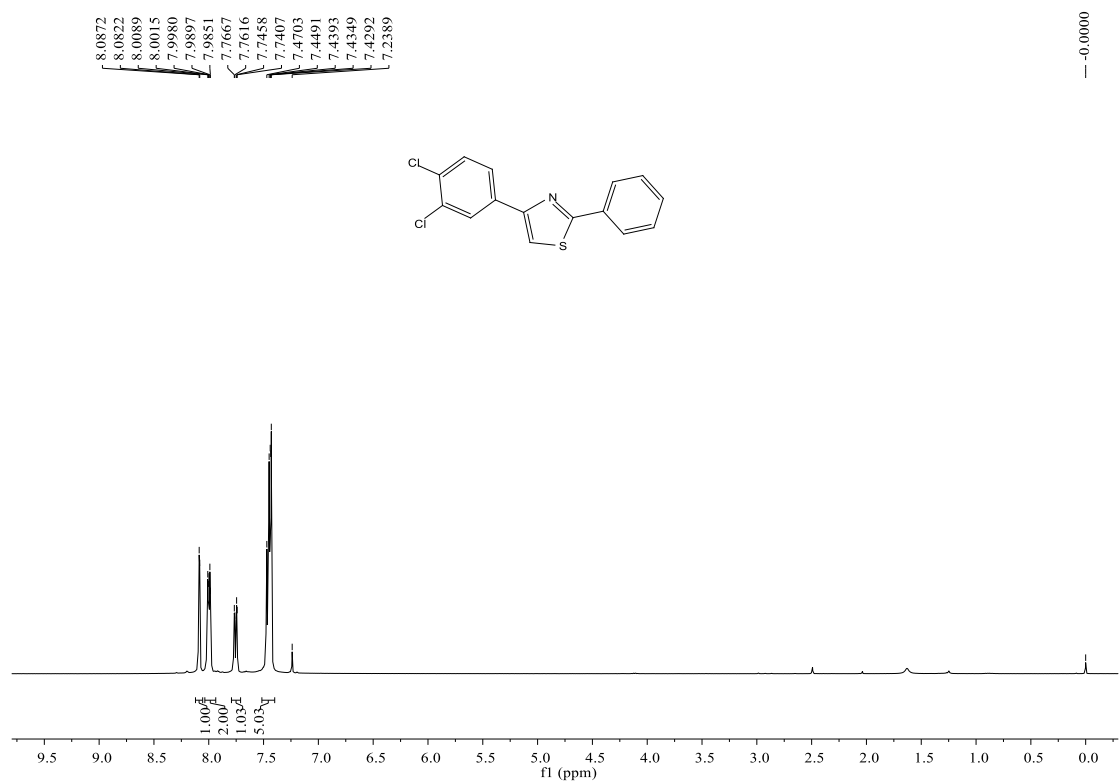

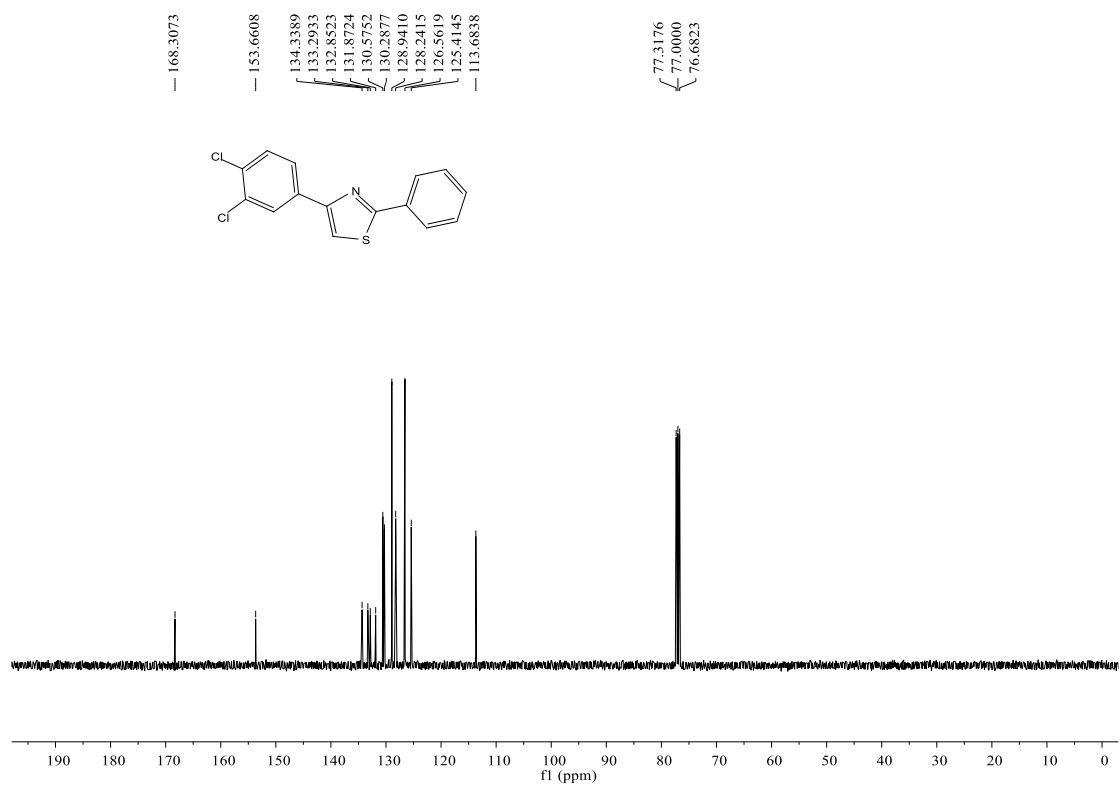

<sup>1</sup>H and <sup>13</sup>C NMR spectra of **3az**

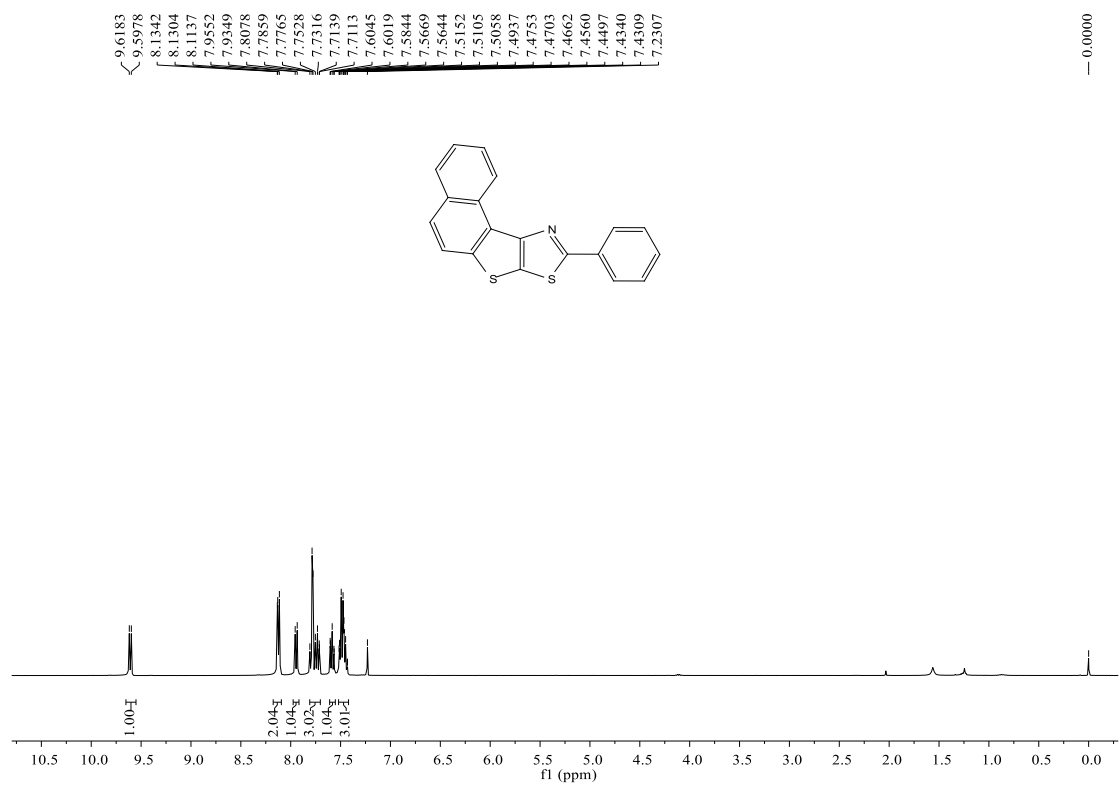

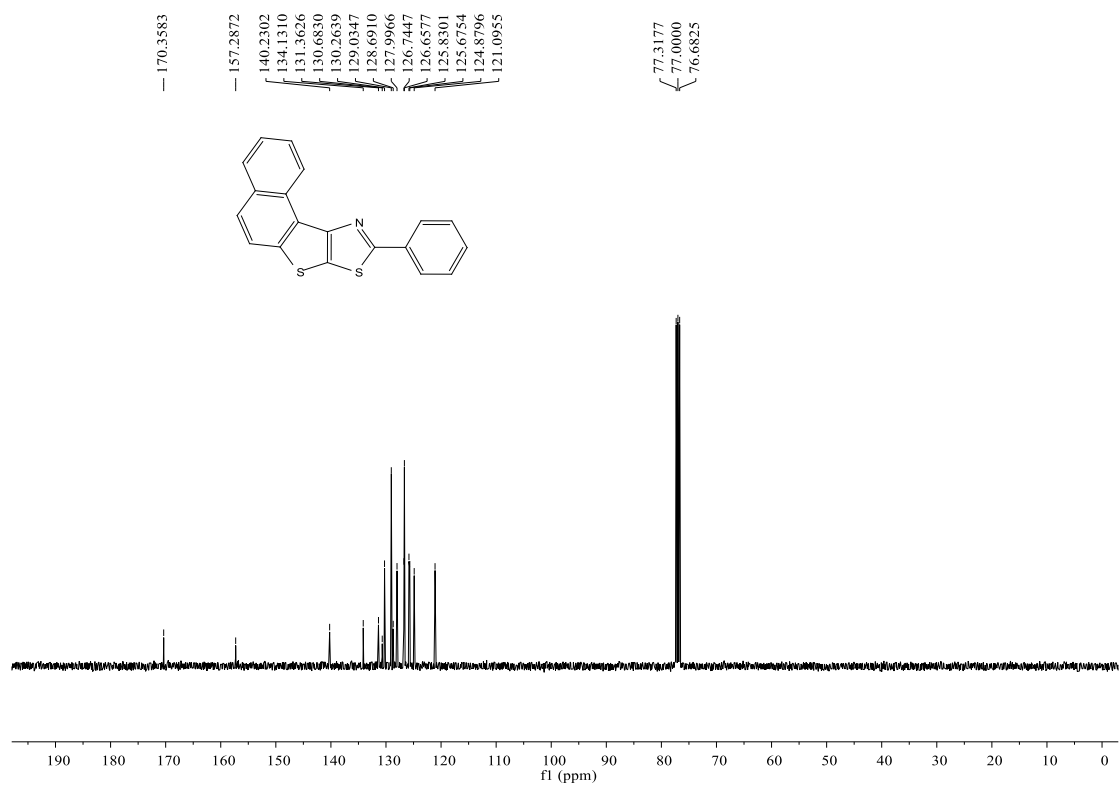

<sup>1</sup>H and <sup>13</sup>C NMR spectra of **3aa'**

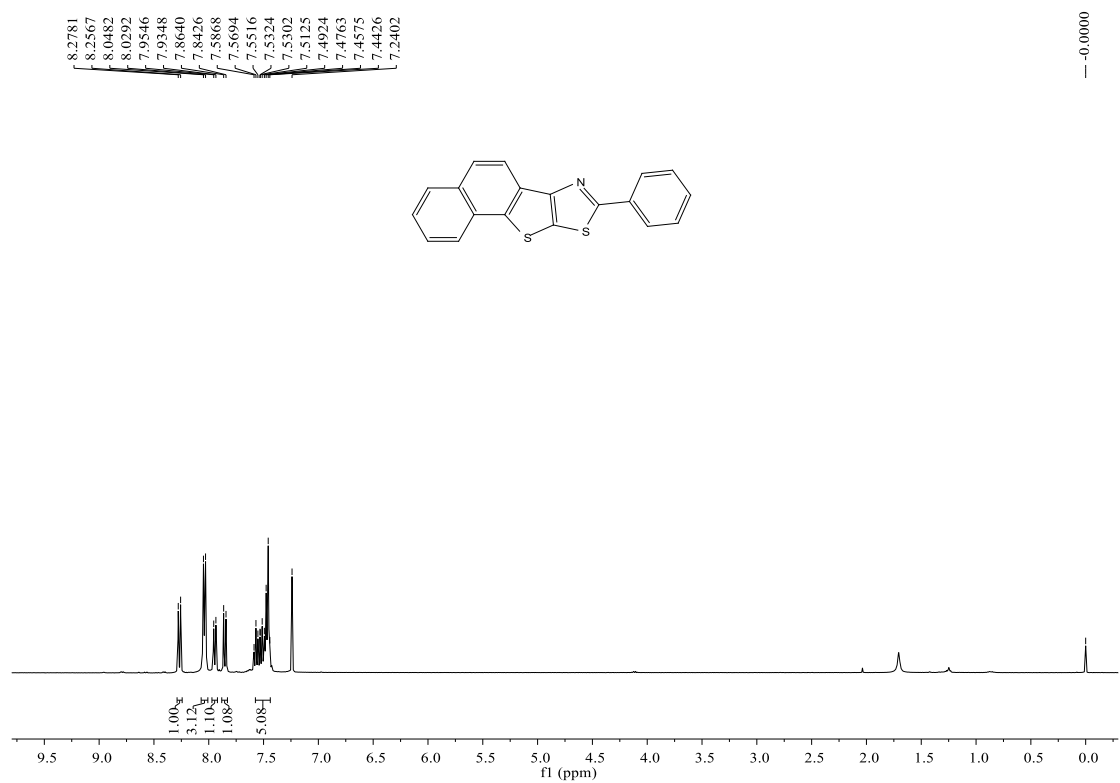

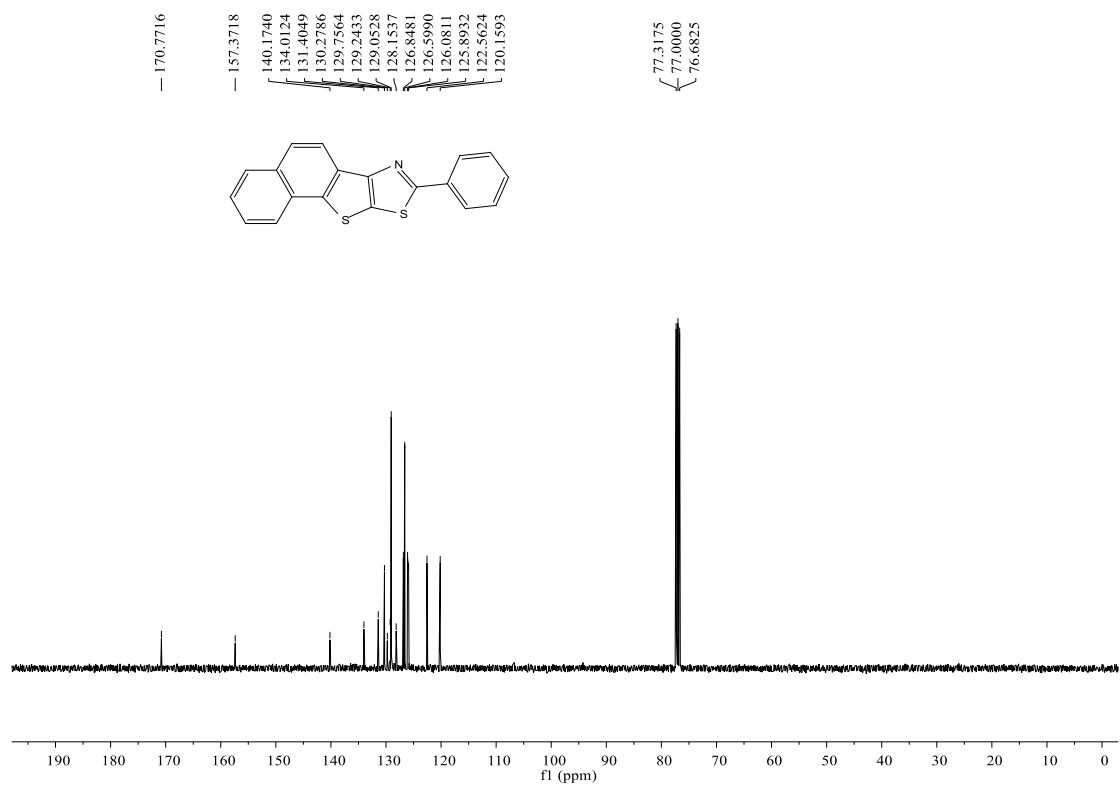

<sup>1</sup>H and <sup>13</sup>C NMR spectra of **3ab**

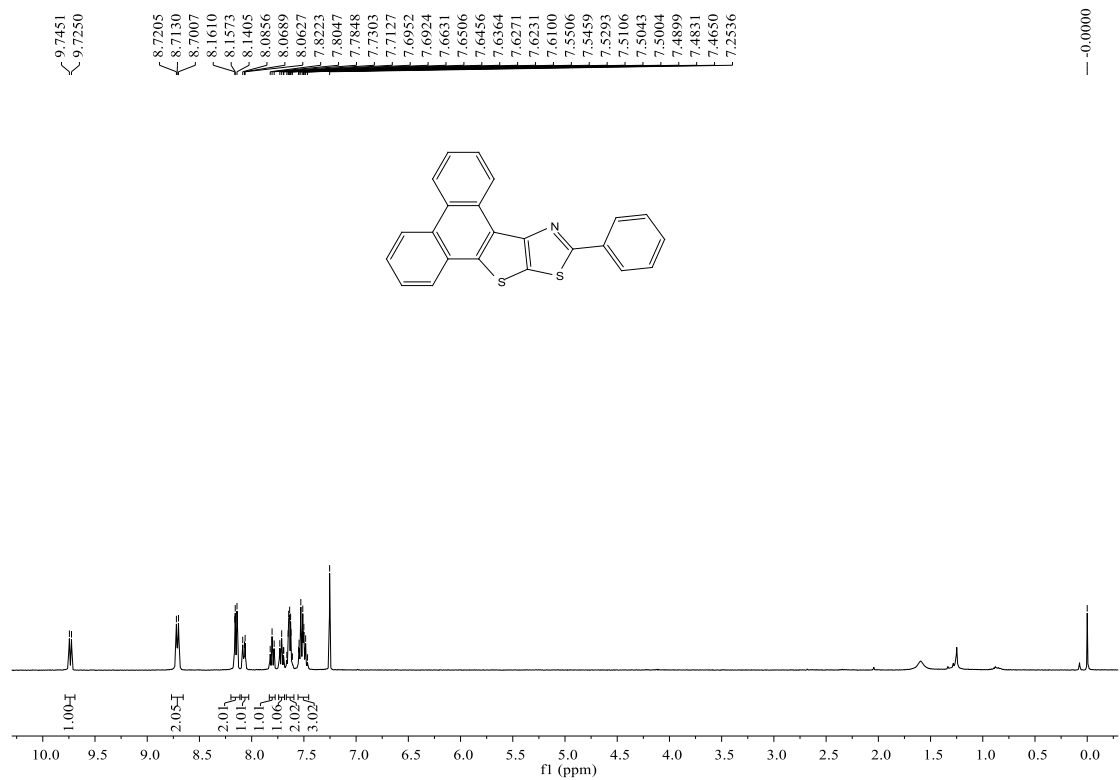

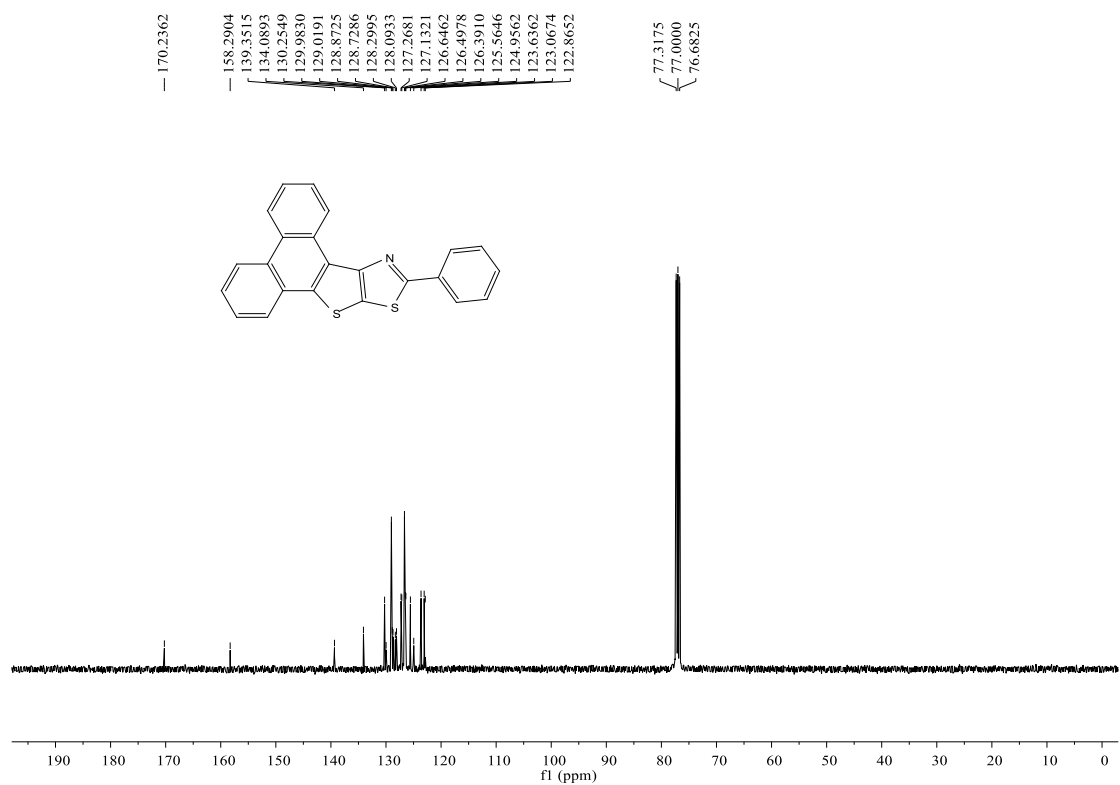

**<sup>1</sup>H and <sup>13</sup>C NMR spectra of 3ac'**

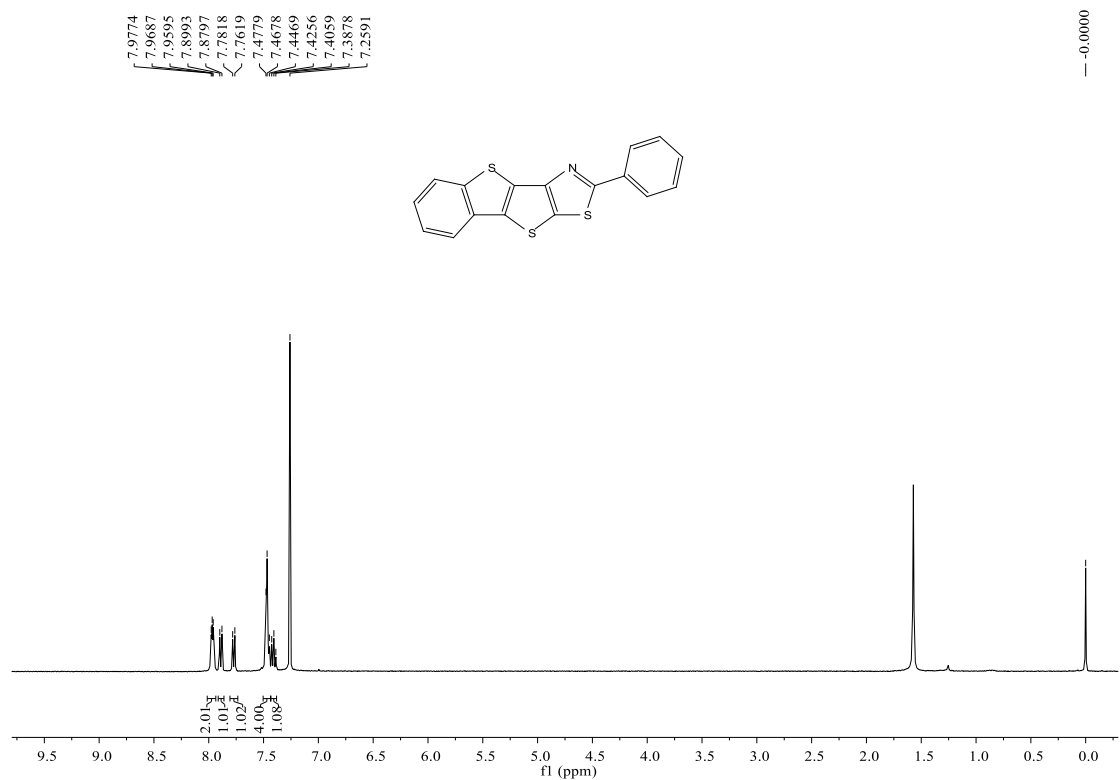

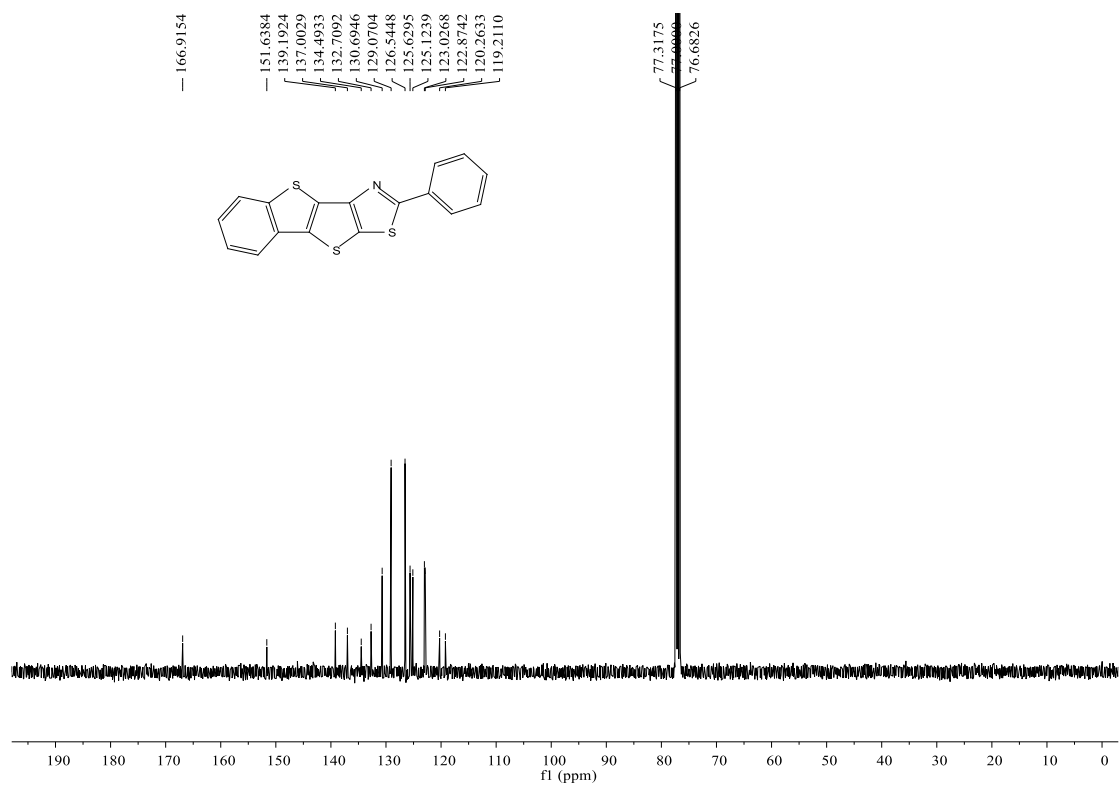

<sup>1</sup>H and <sup>13</sup>C NMR spectra of **3ba**

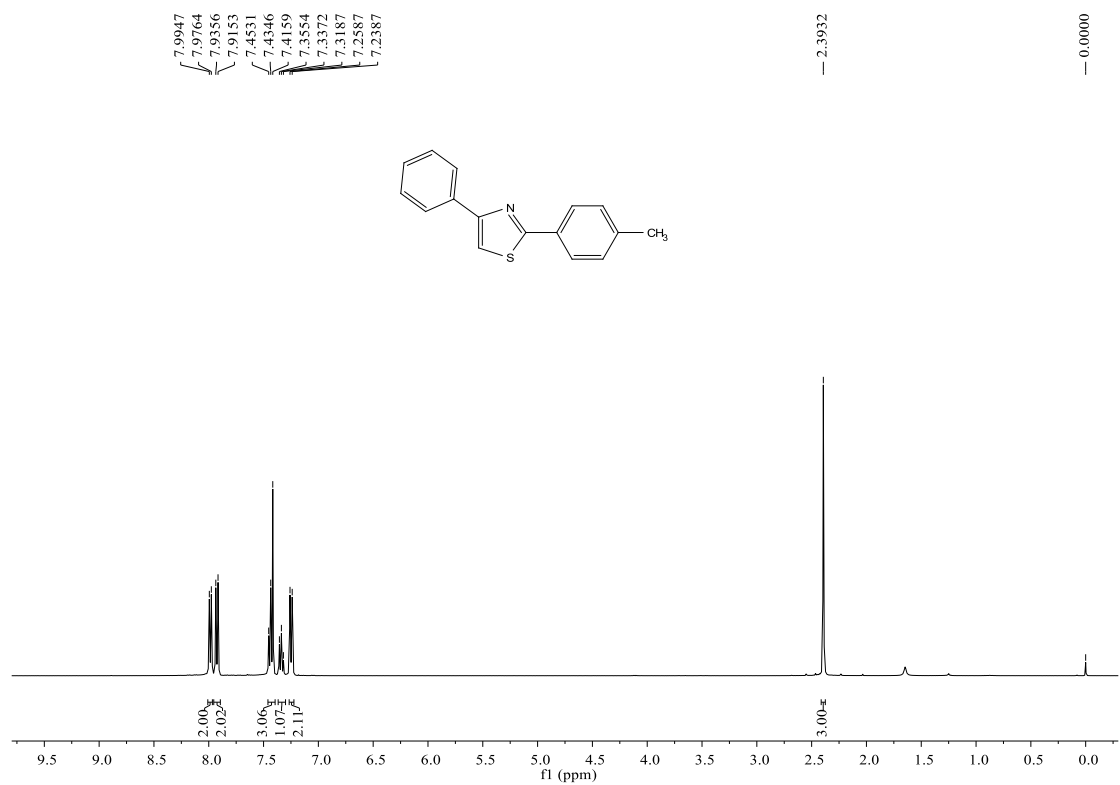



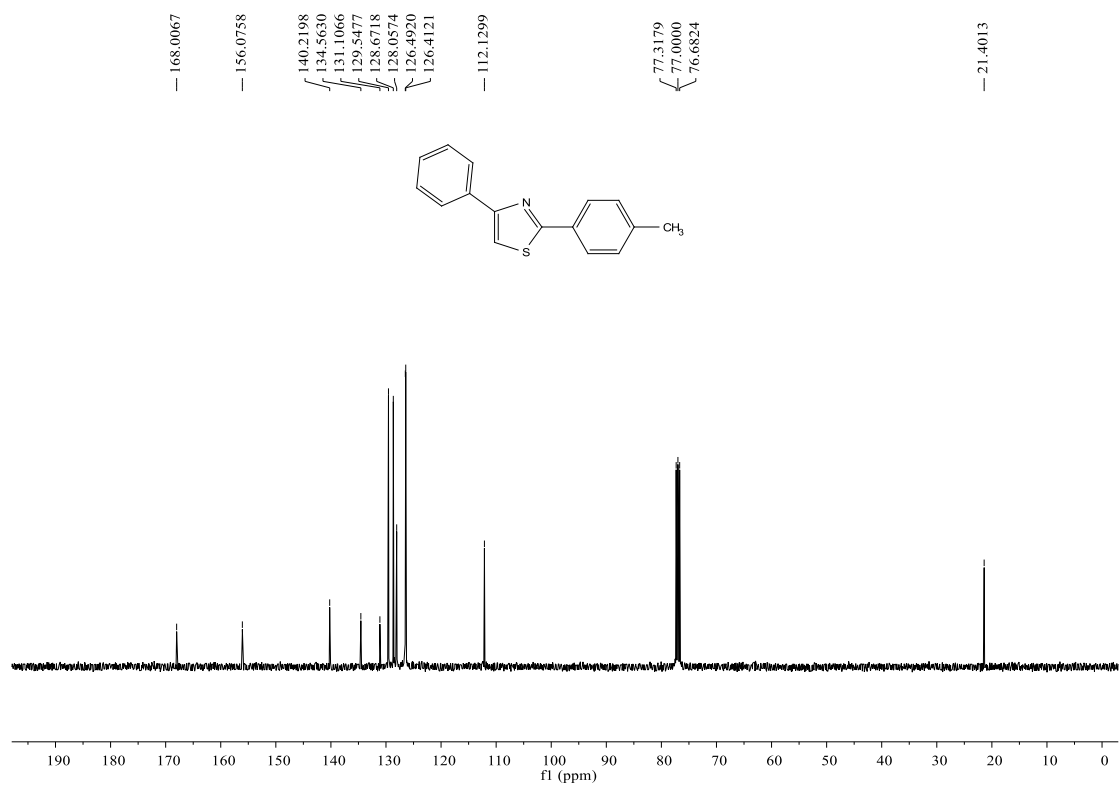

<sup>1</sup>H, <sup>13</sup>C and <sup>19</sup>F NMR spectra of **3ca**

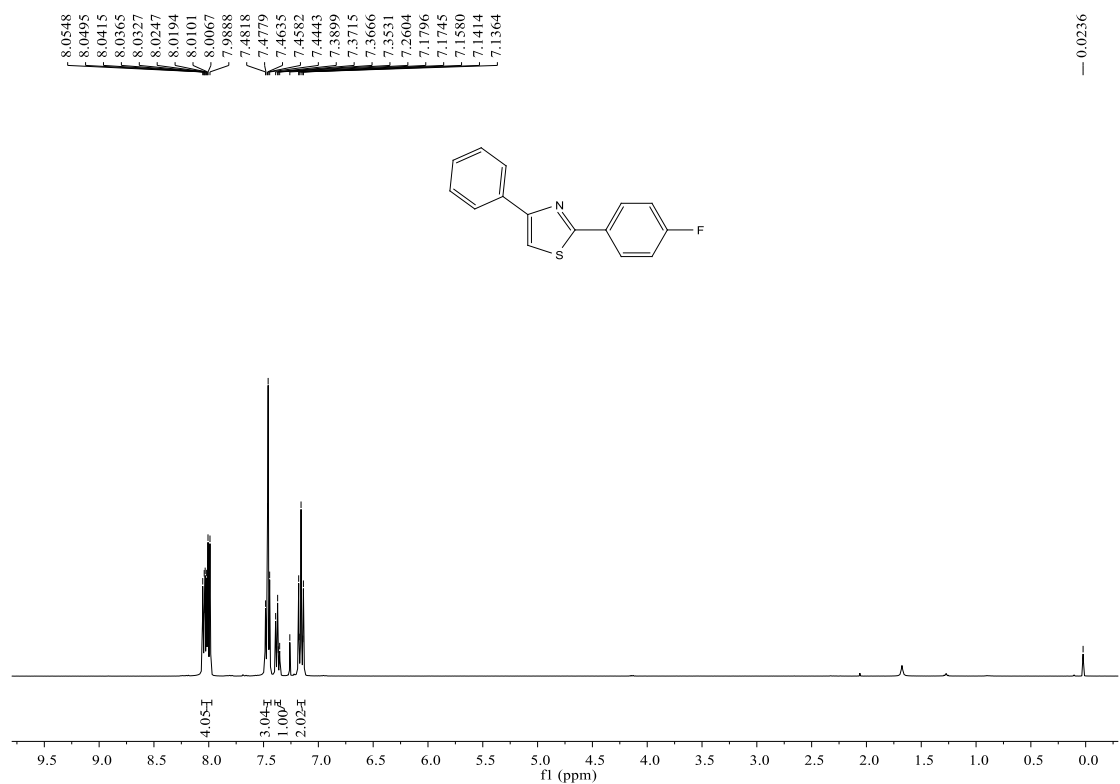

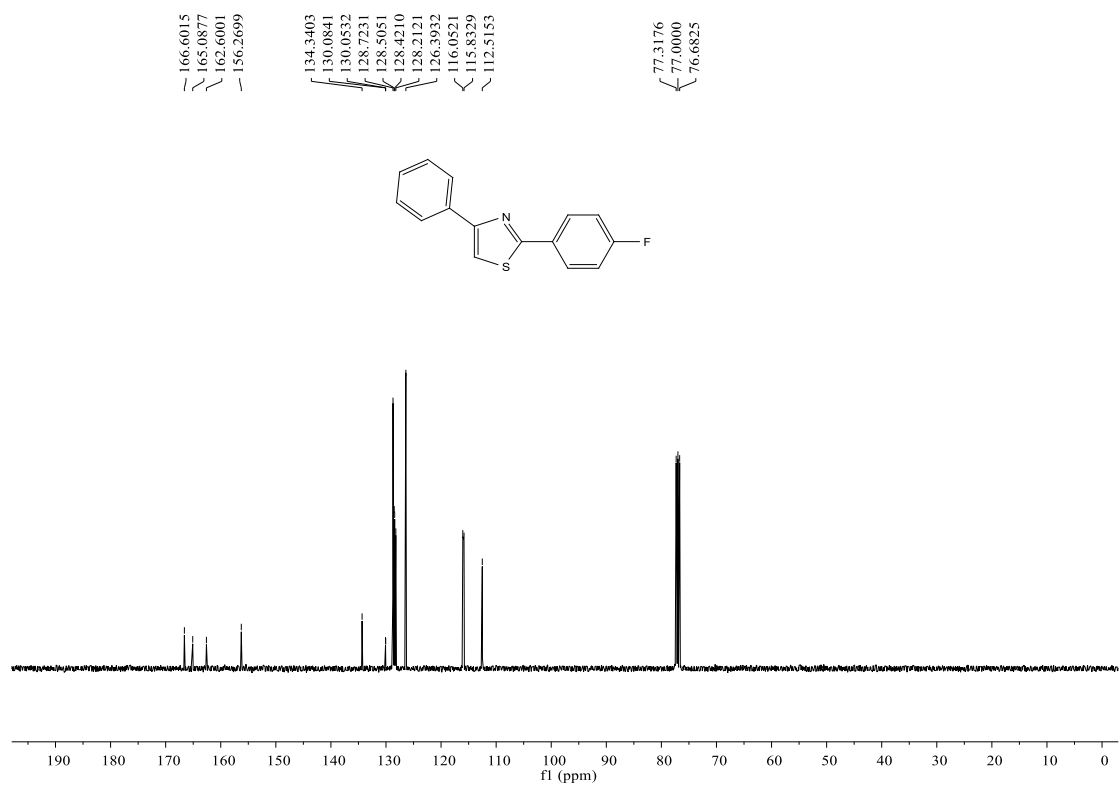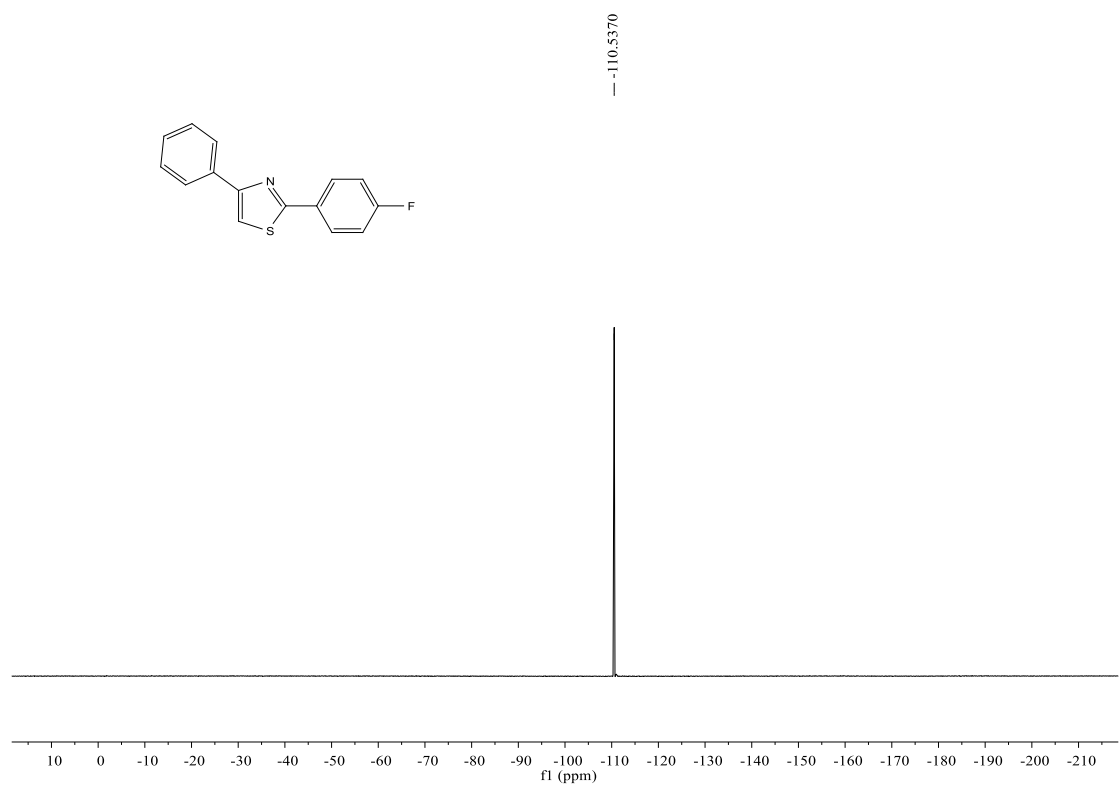

$^1\text{H}$  and  $^{13}\text{C}$  NMR spectra of **3da**

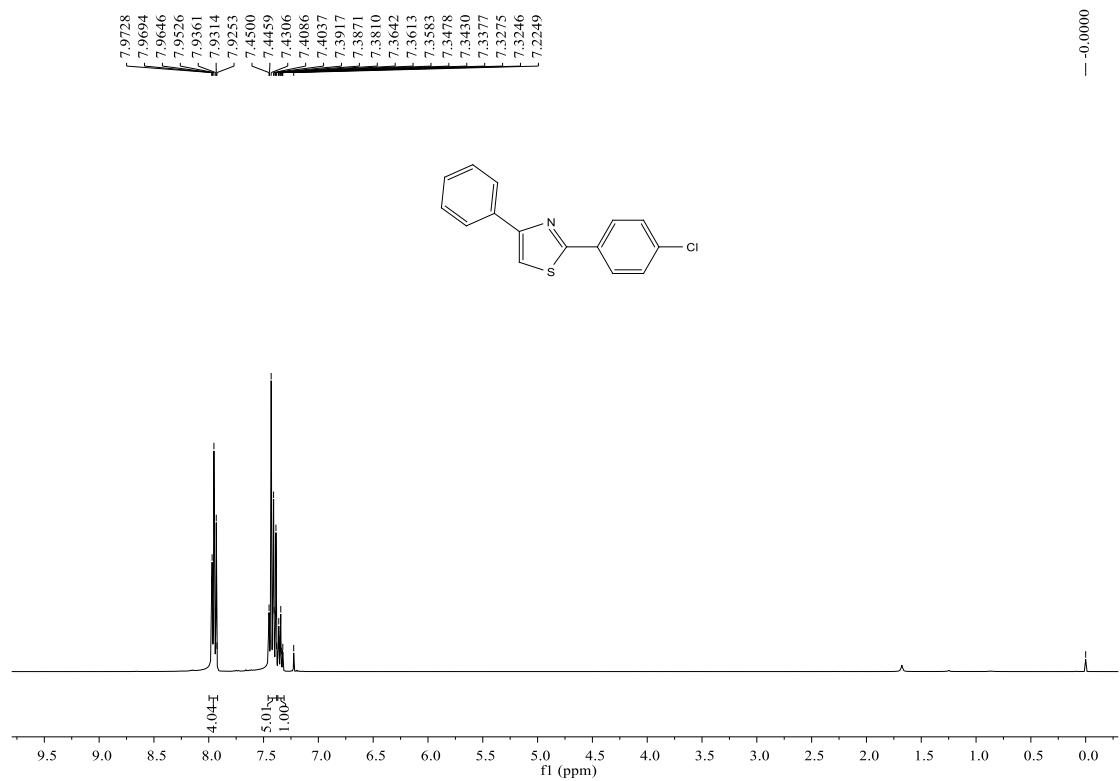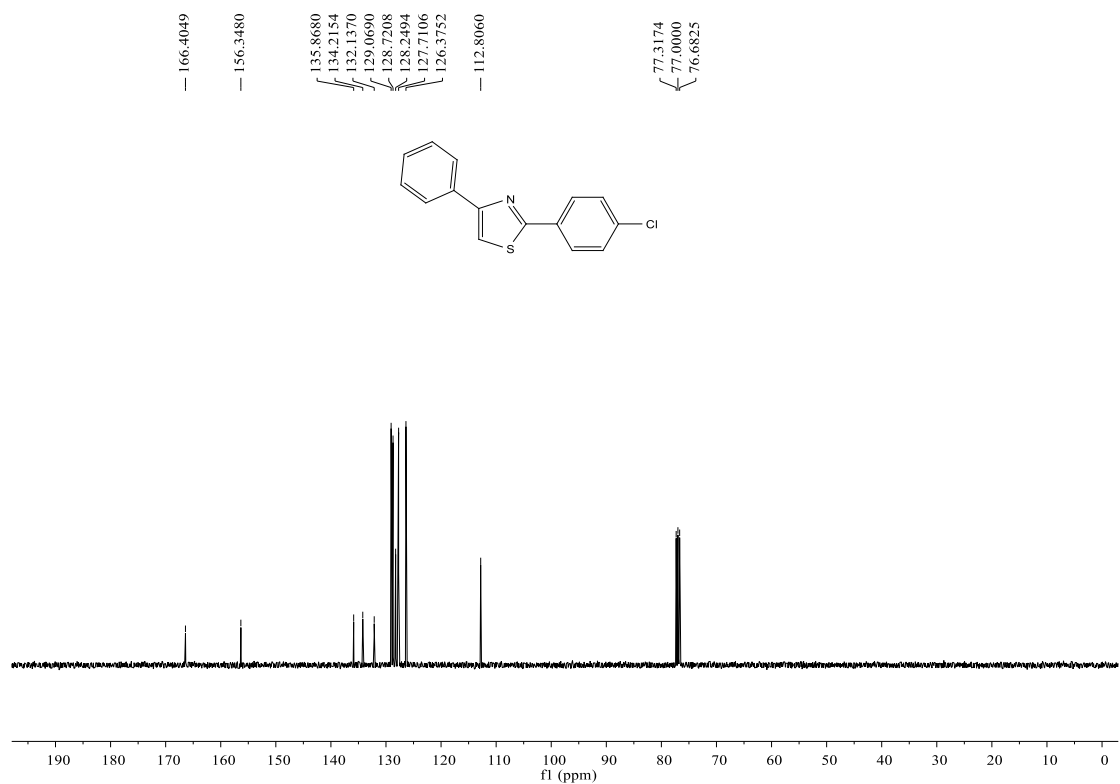

$^1\text{H}$  and  $^{13}\text{C}$  NMR spectra of **3ea**

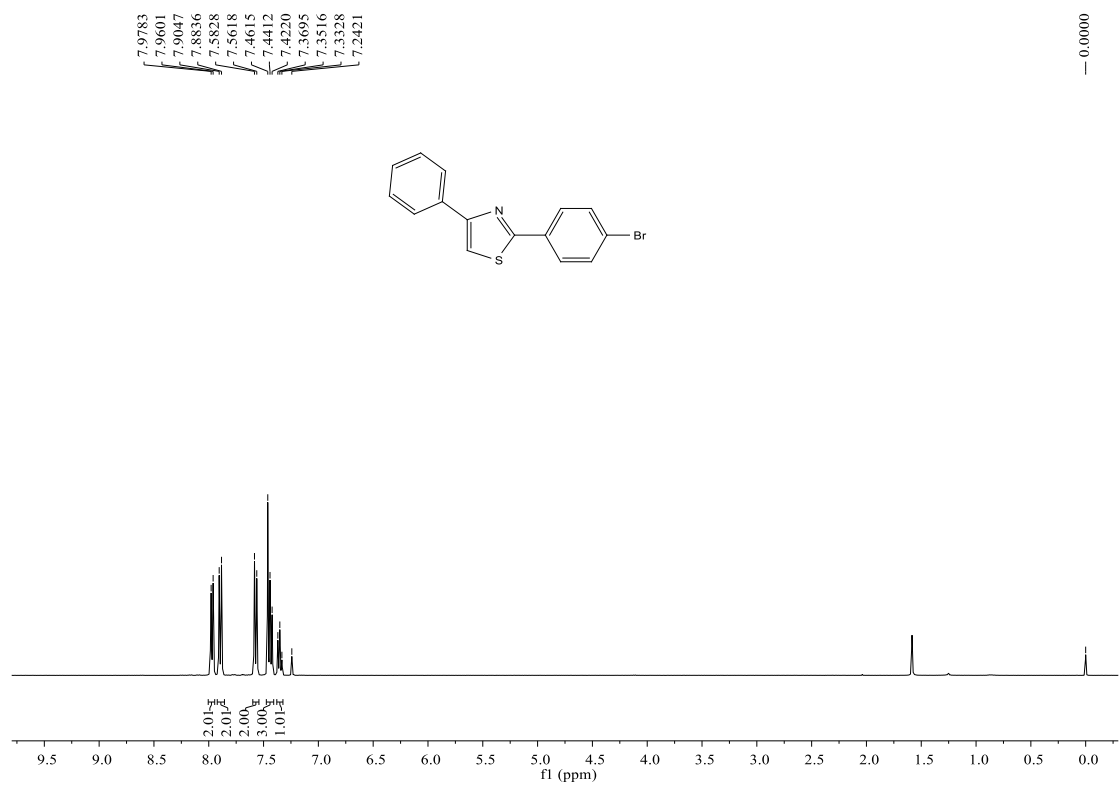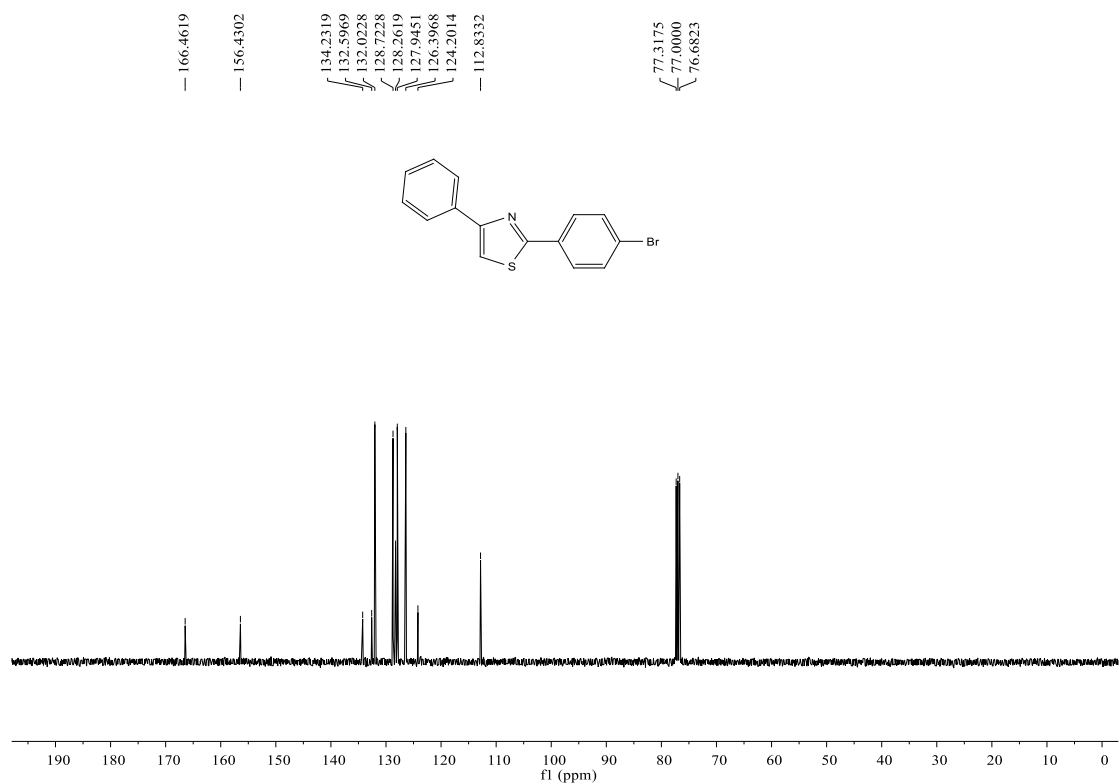

$^1\text{H}$ ,  $^{13}\text{C}$  and  $^{19}\text{F}$  NMR spectra of **3fa**

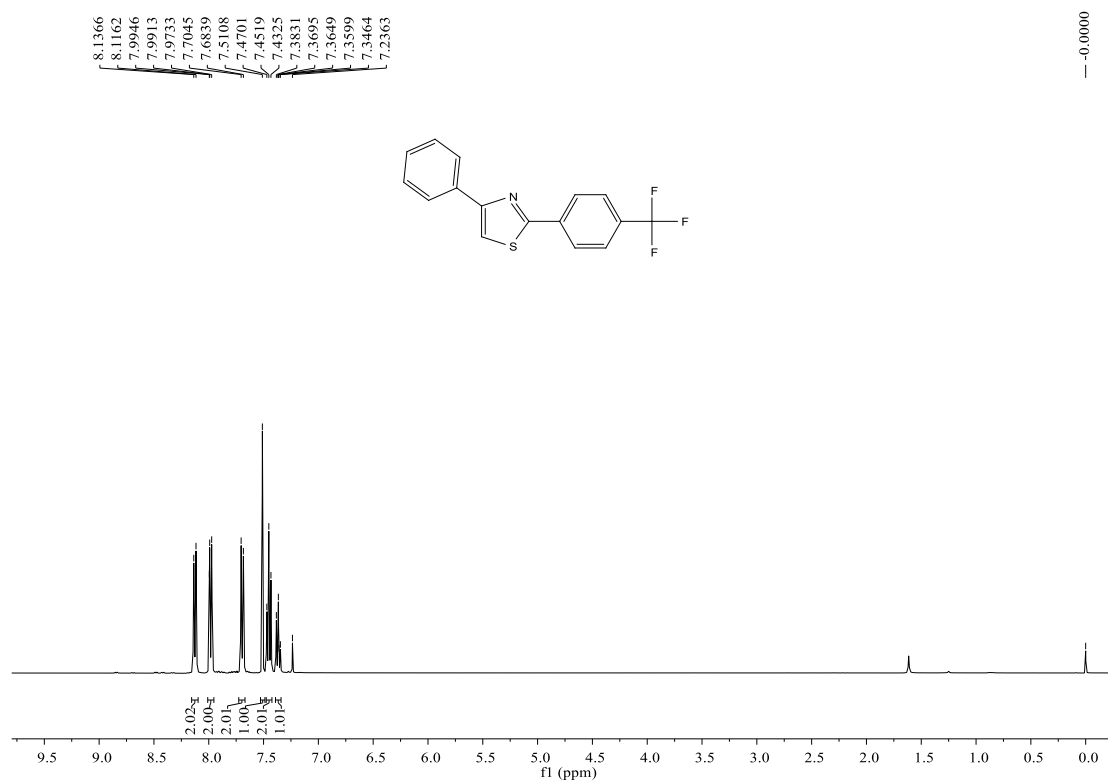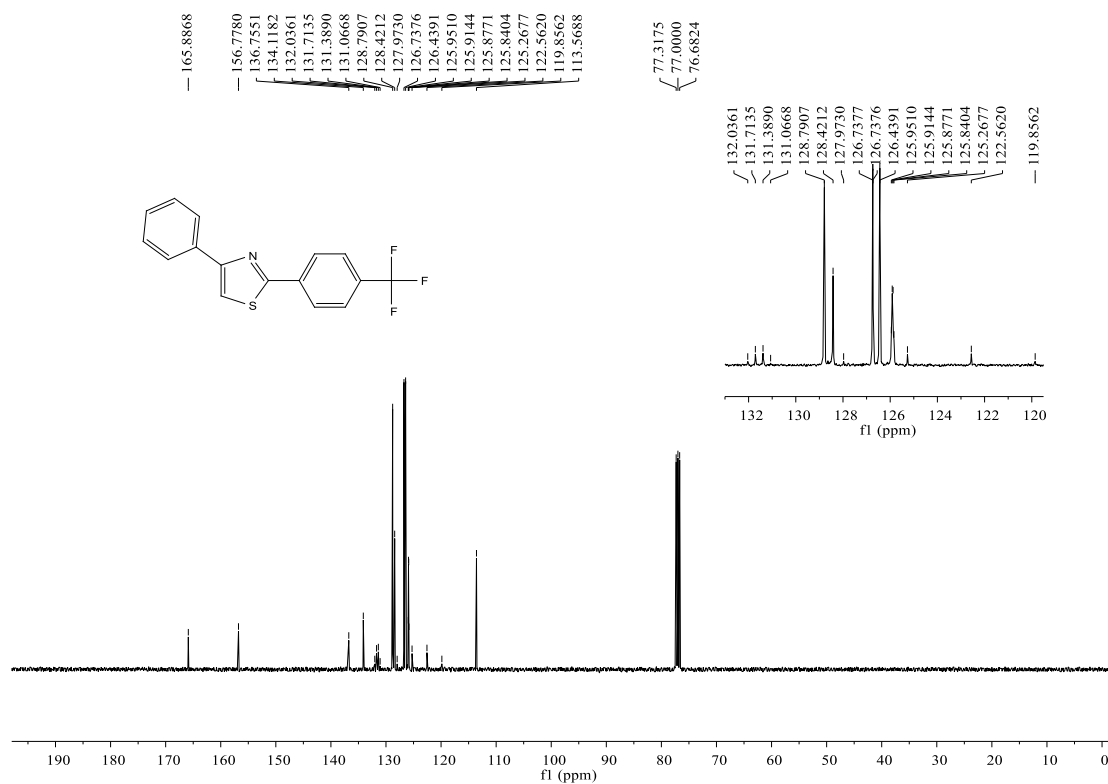

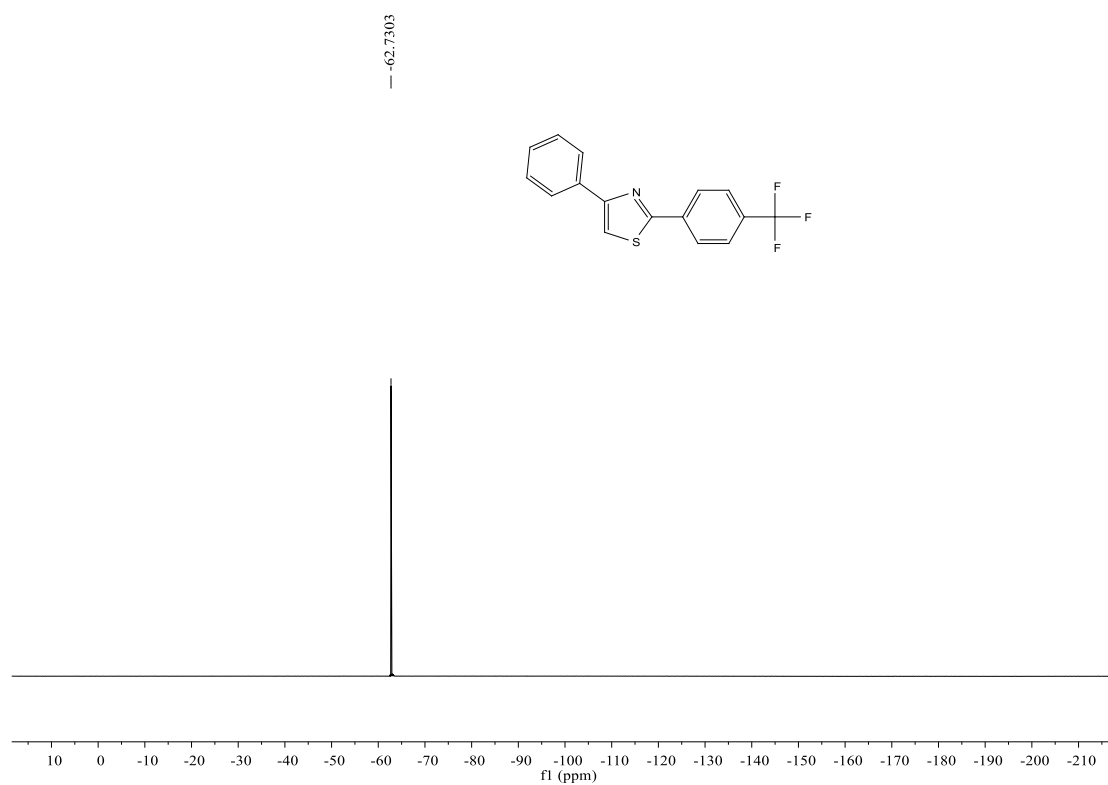

<sup>1</sup>H, <sup>13</sup>C and <sup>19</sup>F NMR spectra of **3ga**

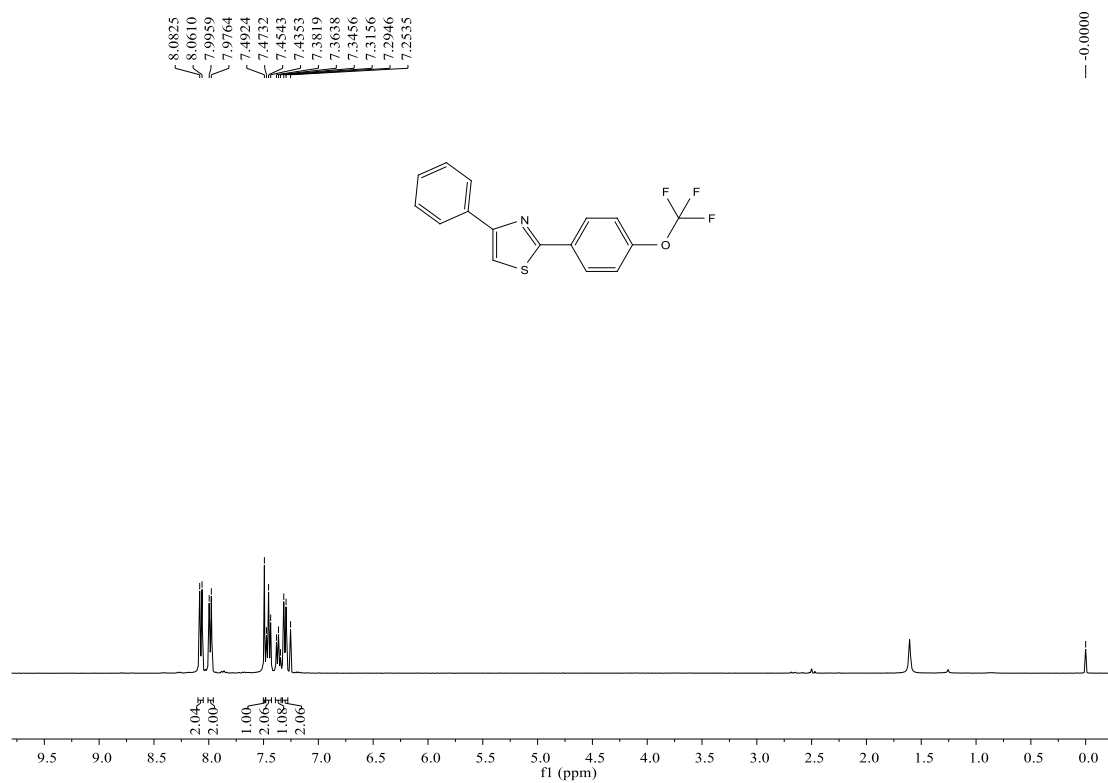



$^1\text{H}$  and  $^{13}\text{C}$  NMR spectra of **3ha**

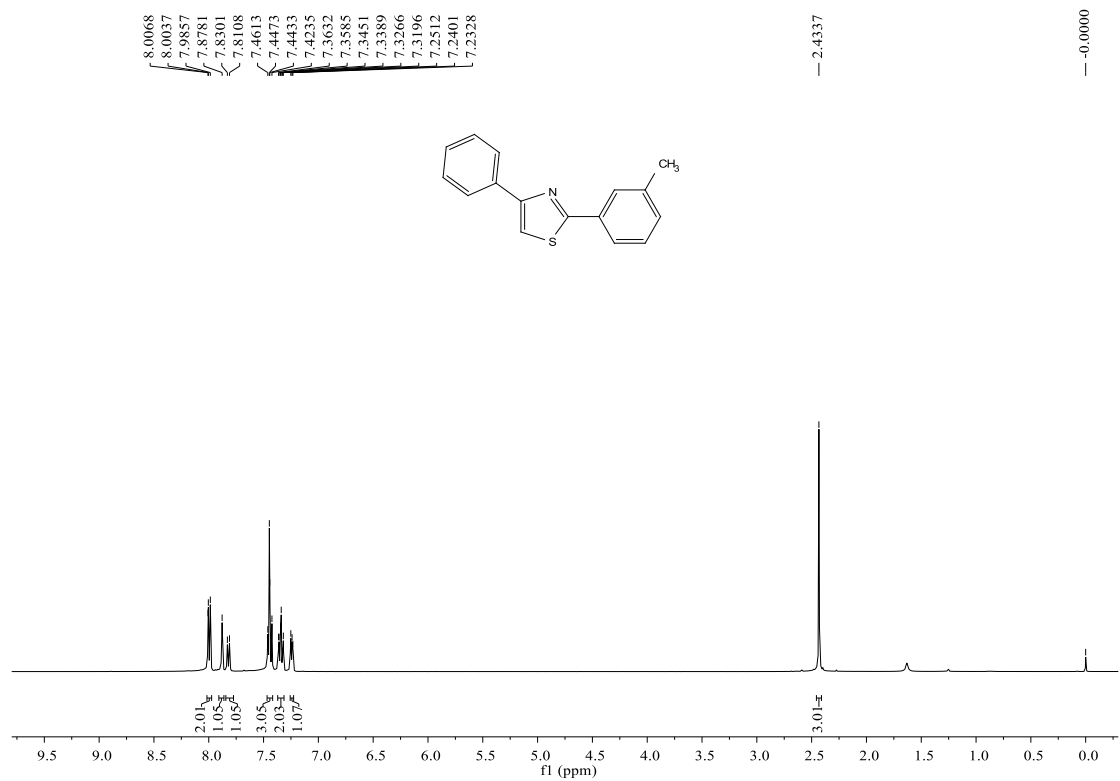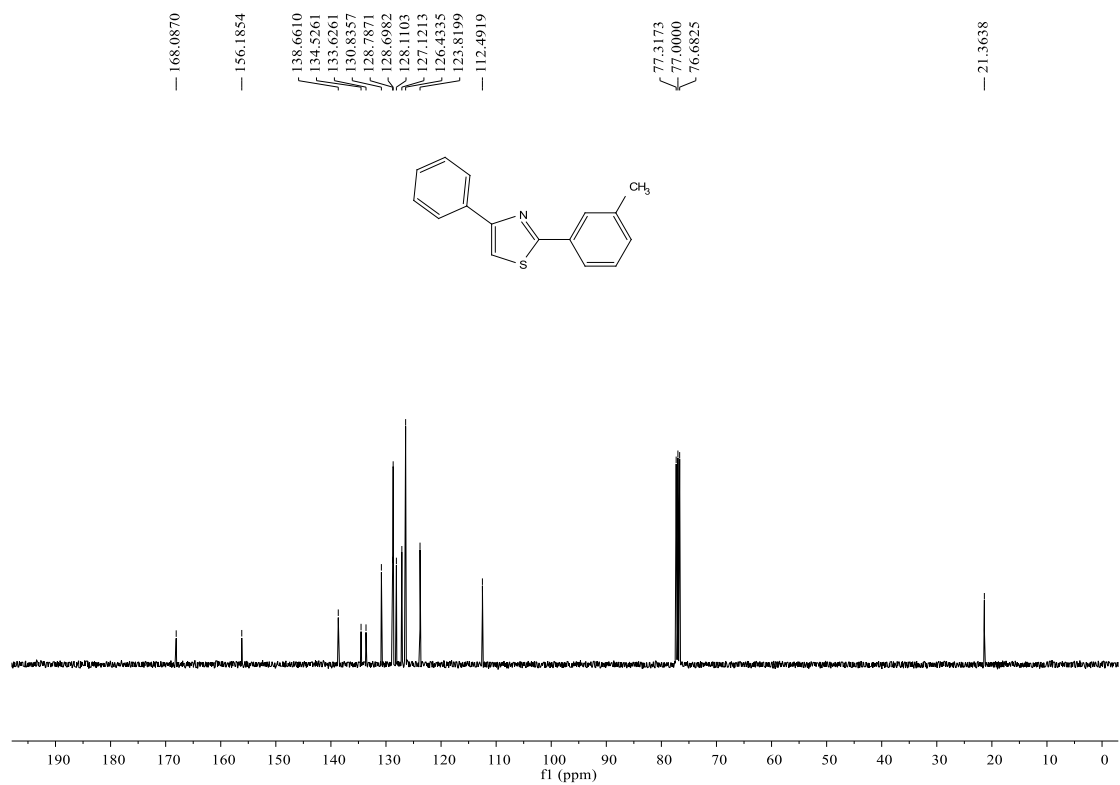



$^1\text{H}$ ,  $^{13}\text{C}$  and  $^{19}\text{F}$  NMR spectra of **3ia**

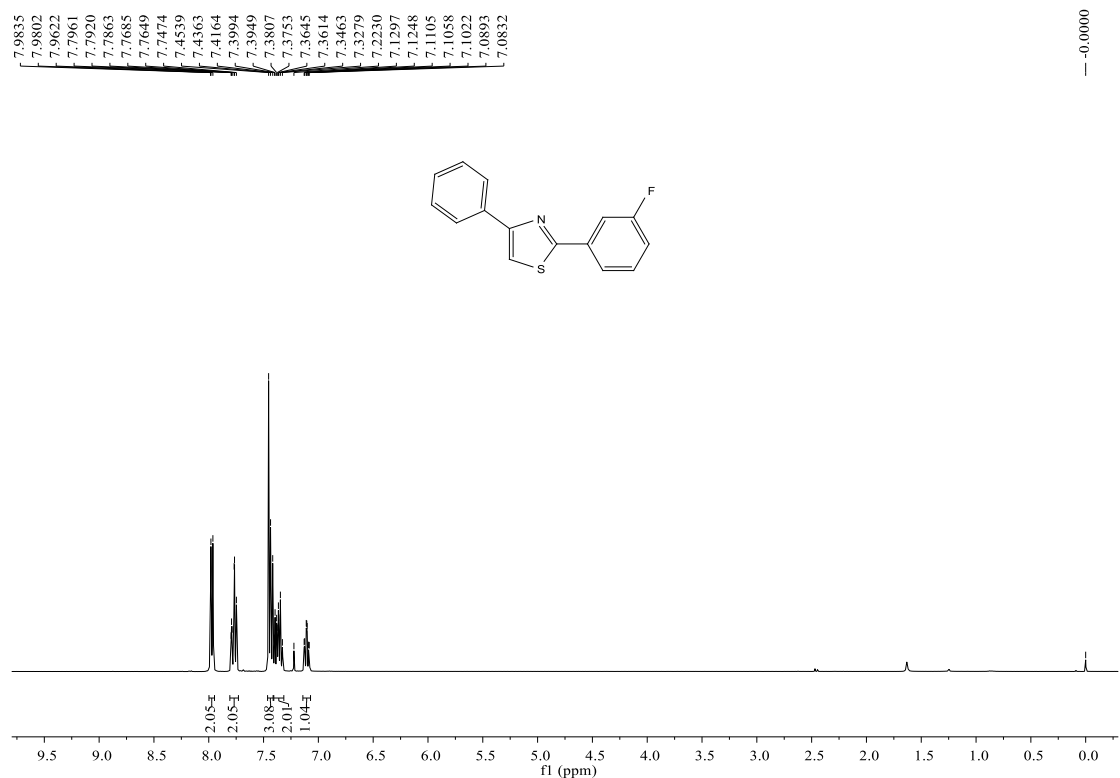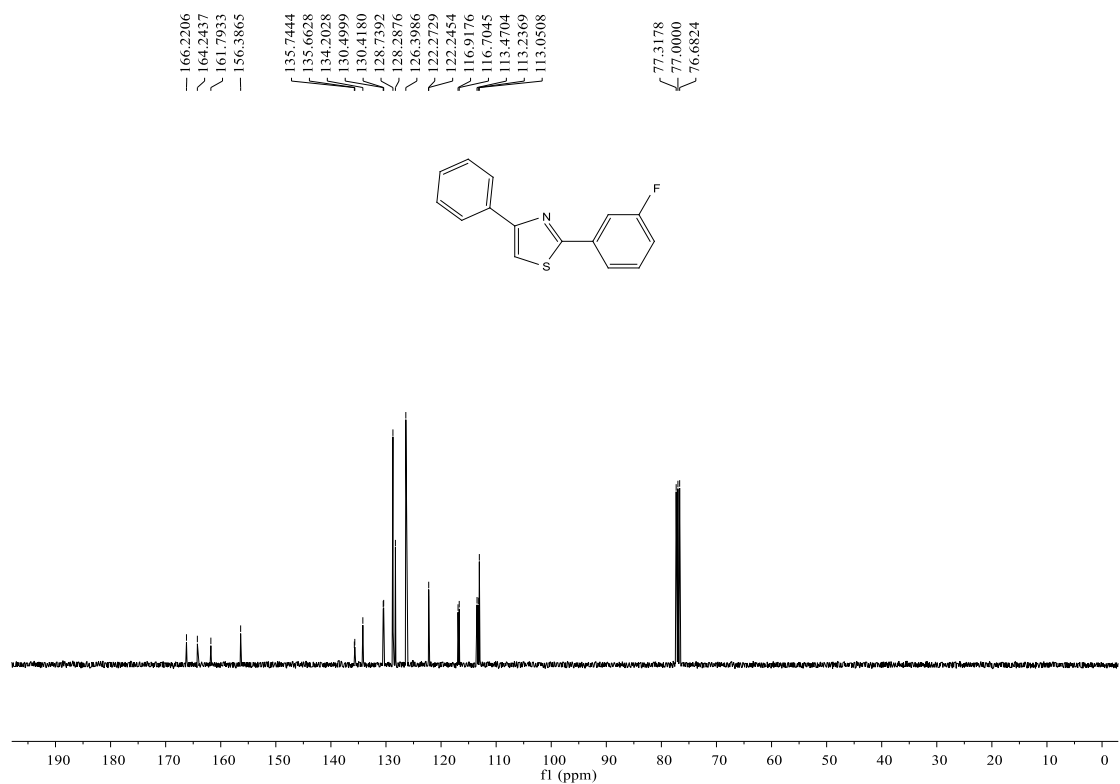

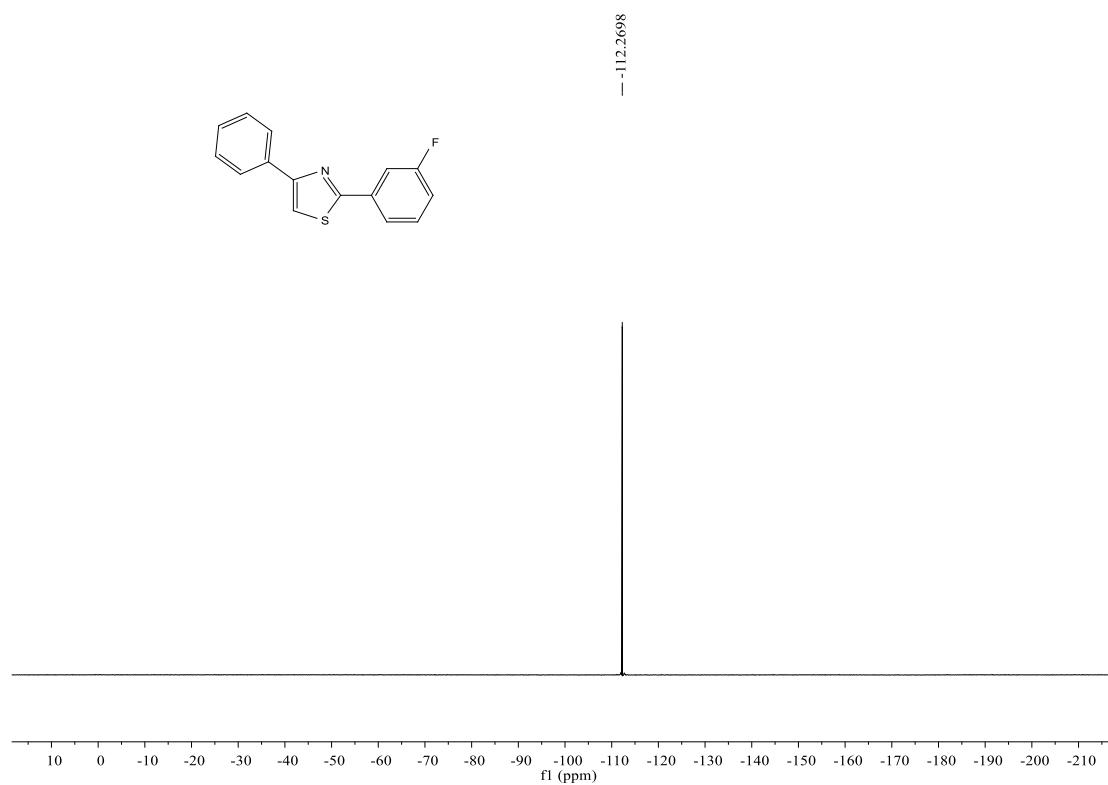

$^1\text{H}$  and  $^{13}\text{C}$  NMR spectra of **3ja**

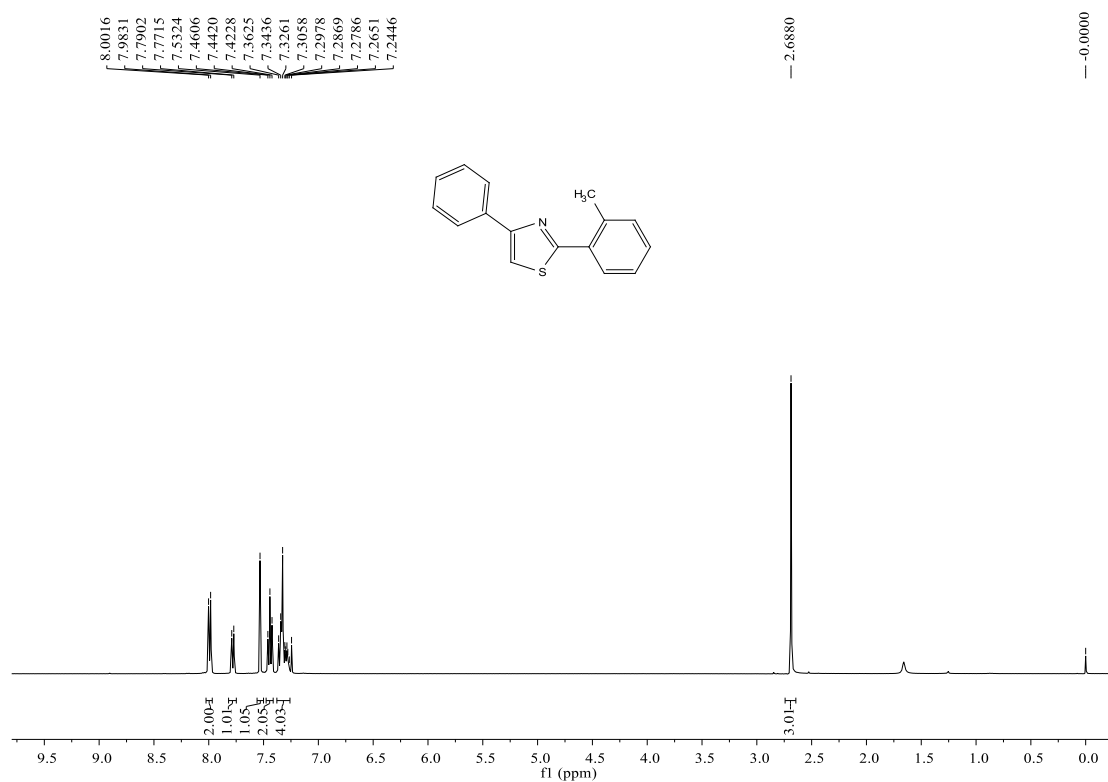

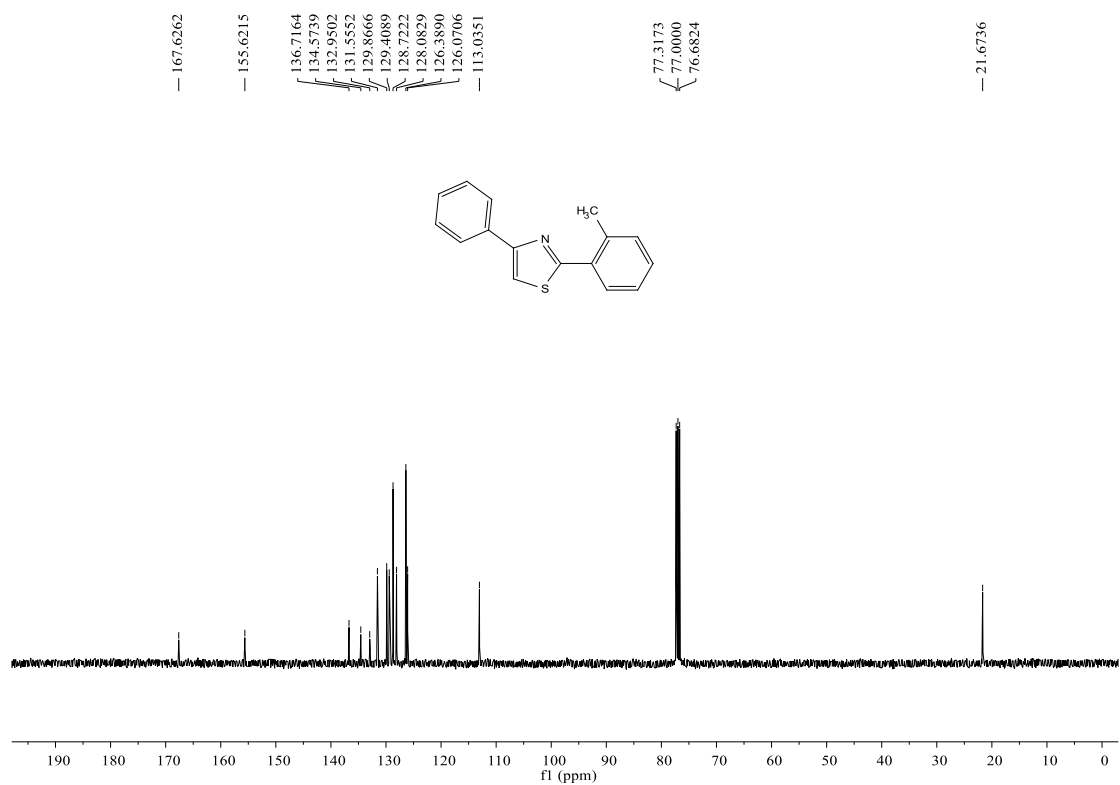

<sup>1</sup>H and <sup>13</sup>C NMR spectra of **3ka**

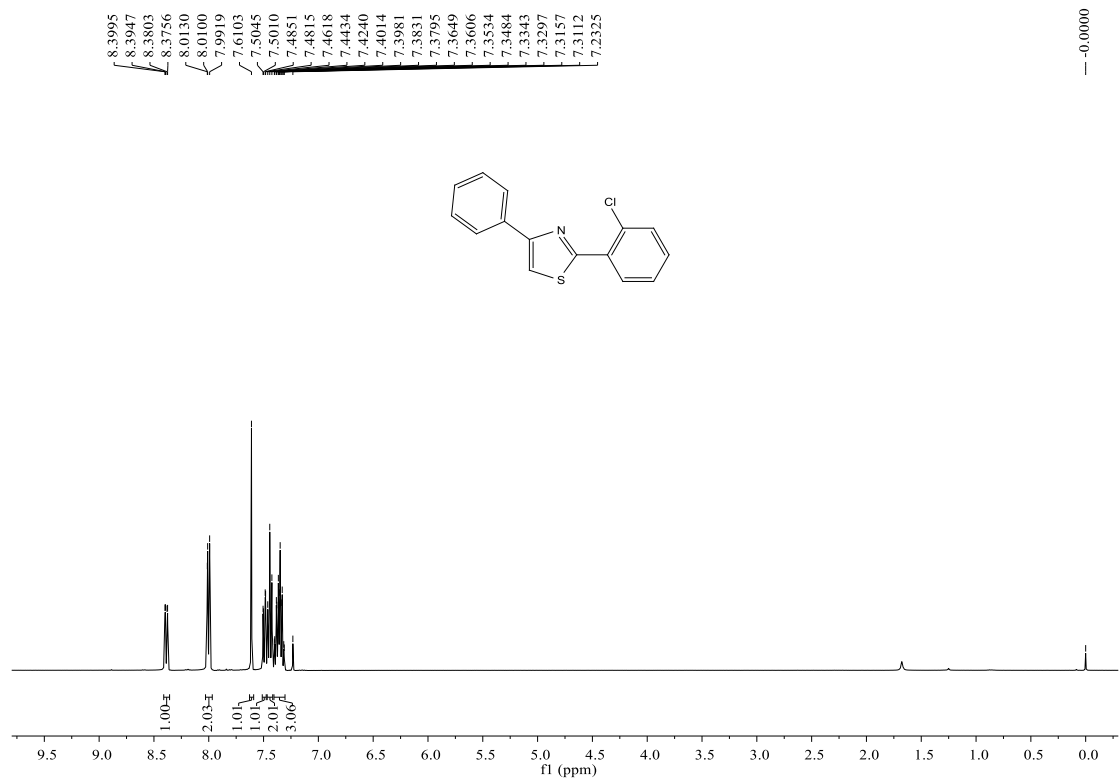

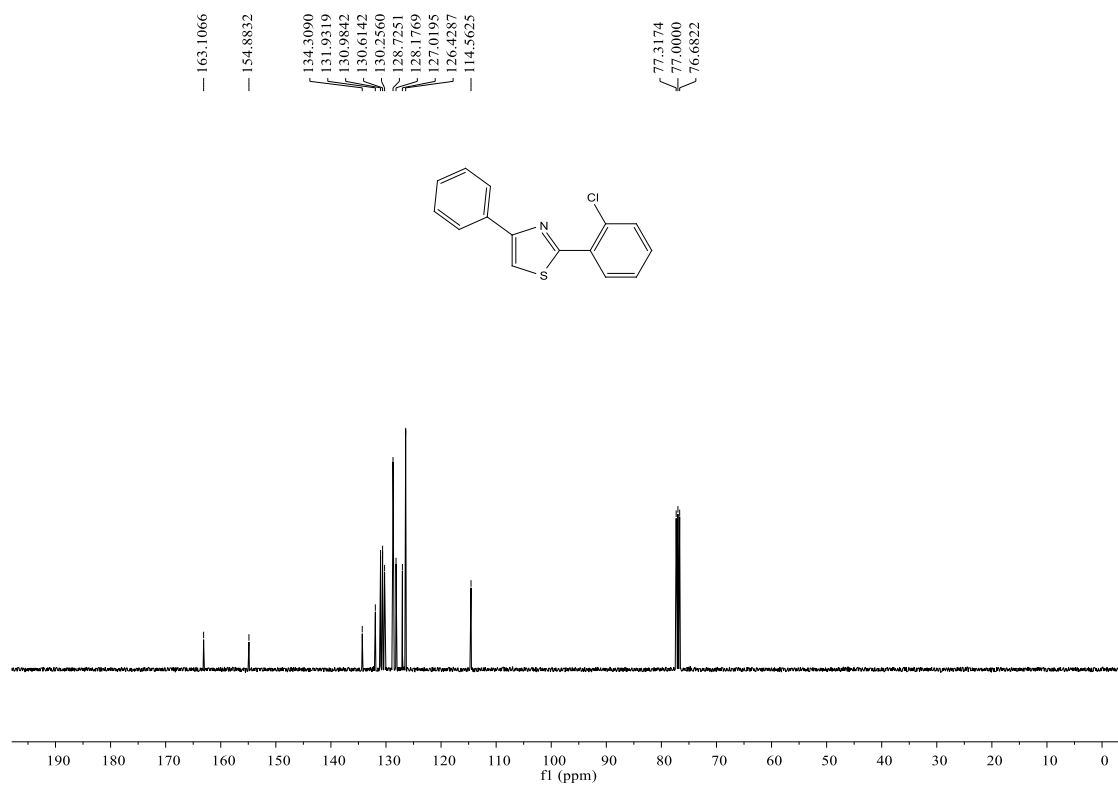

<sup>1</sup>H, <sup>13</sup>C and <sup>19</sup>F NMR spectra of **3la**

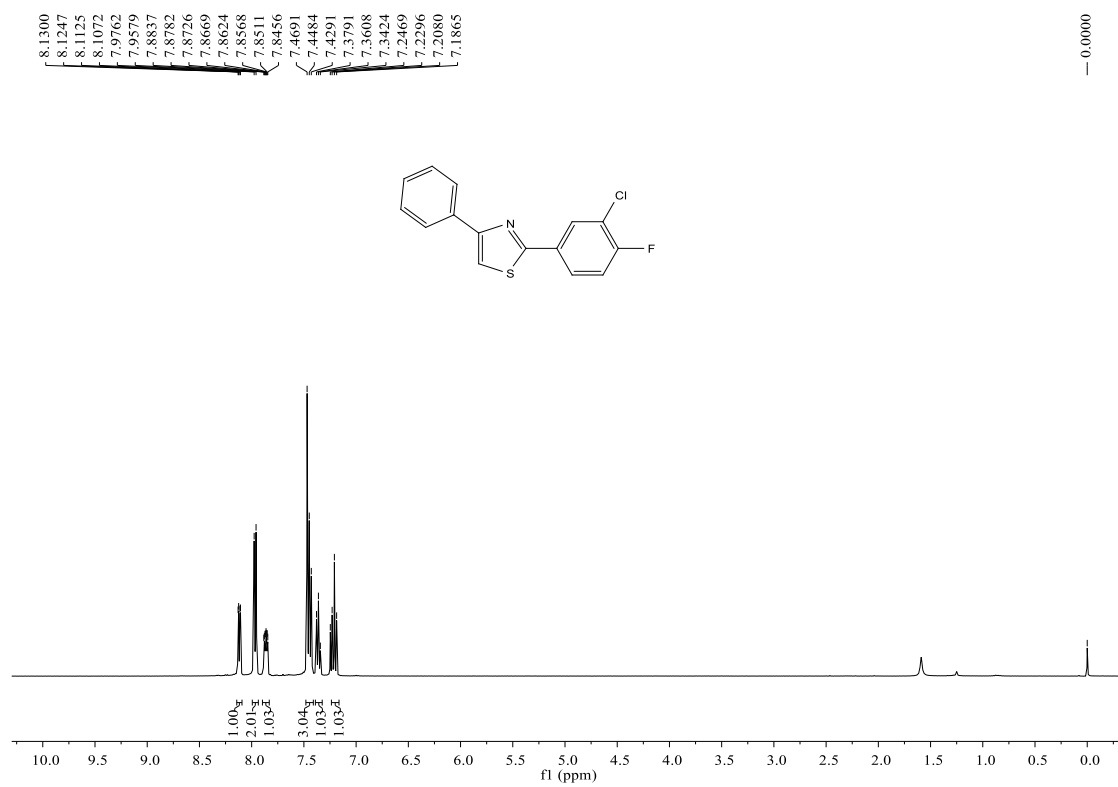

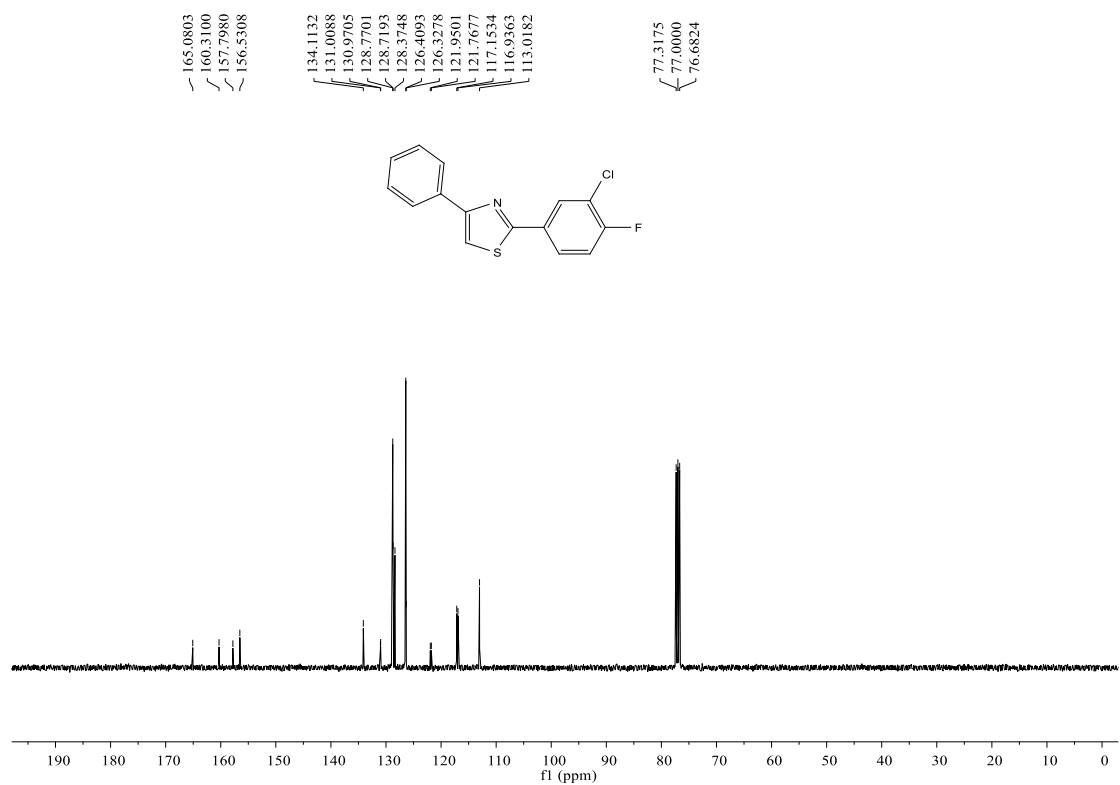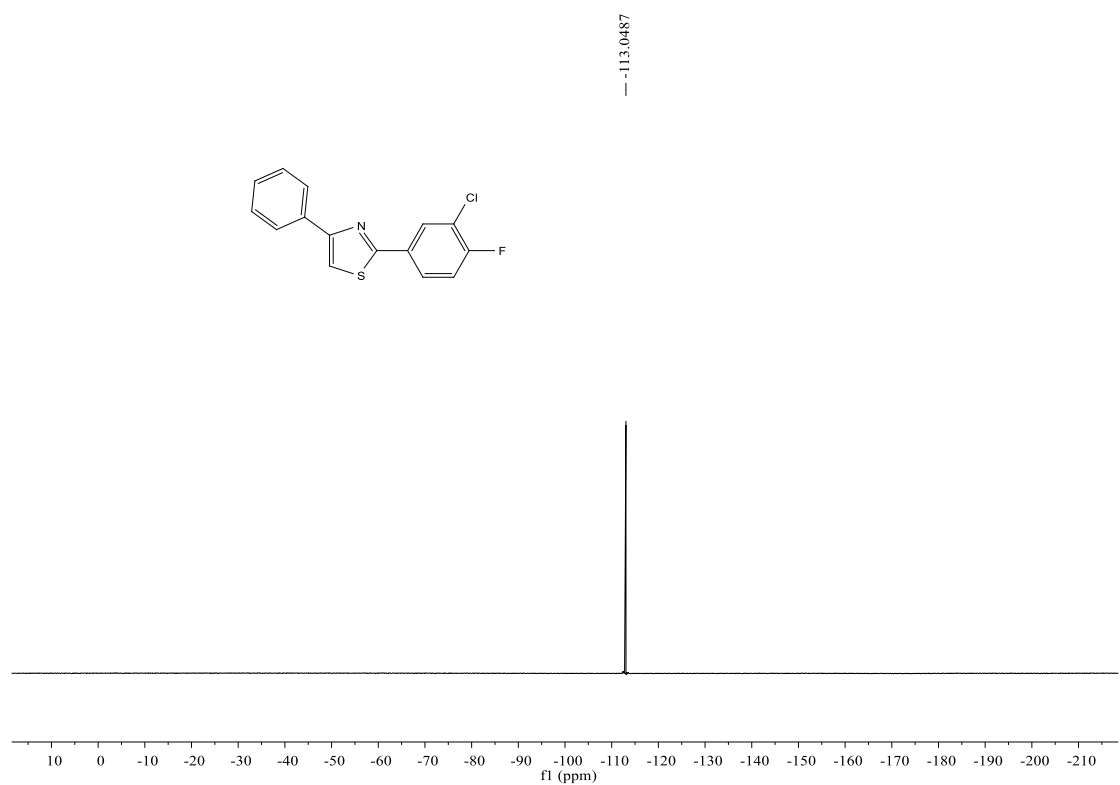

$^1\text{H}$ ,  $^{13}\text{C}$  and  $^{19}\text{F}$  NMR spectra of **3ma**

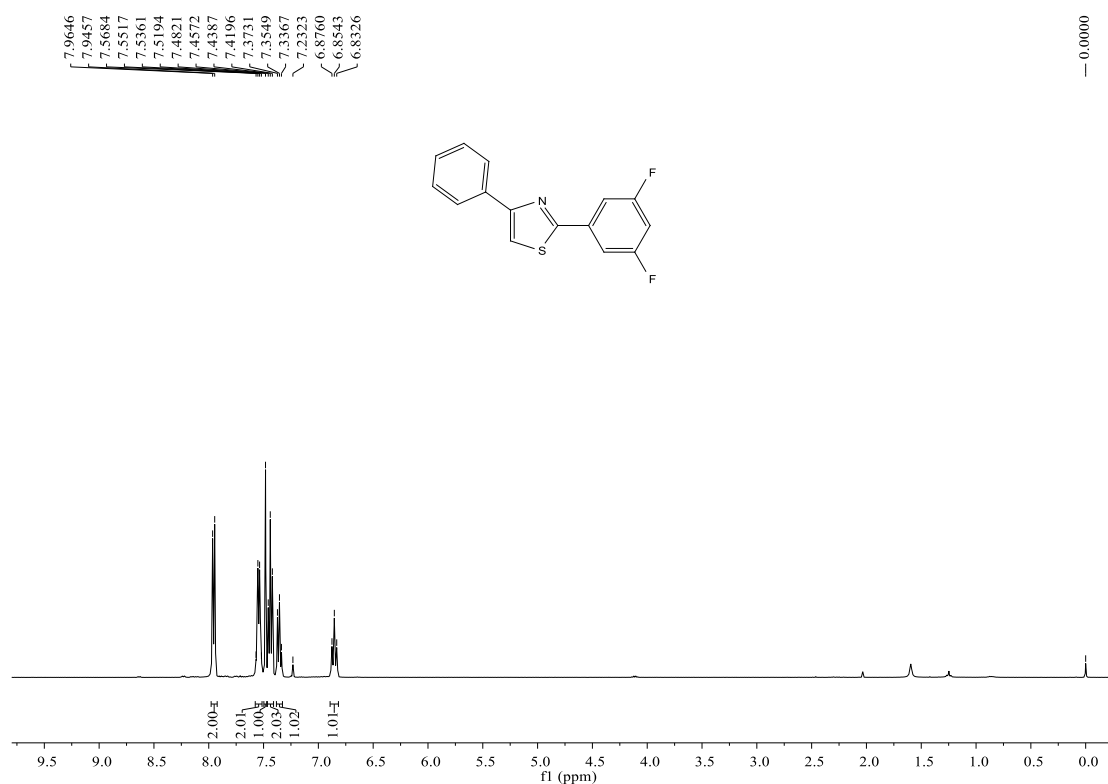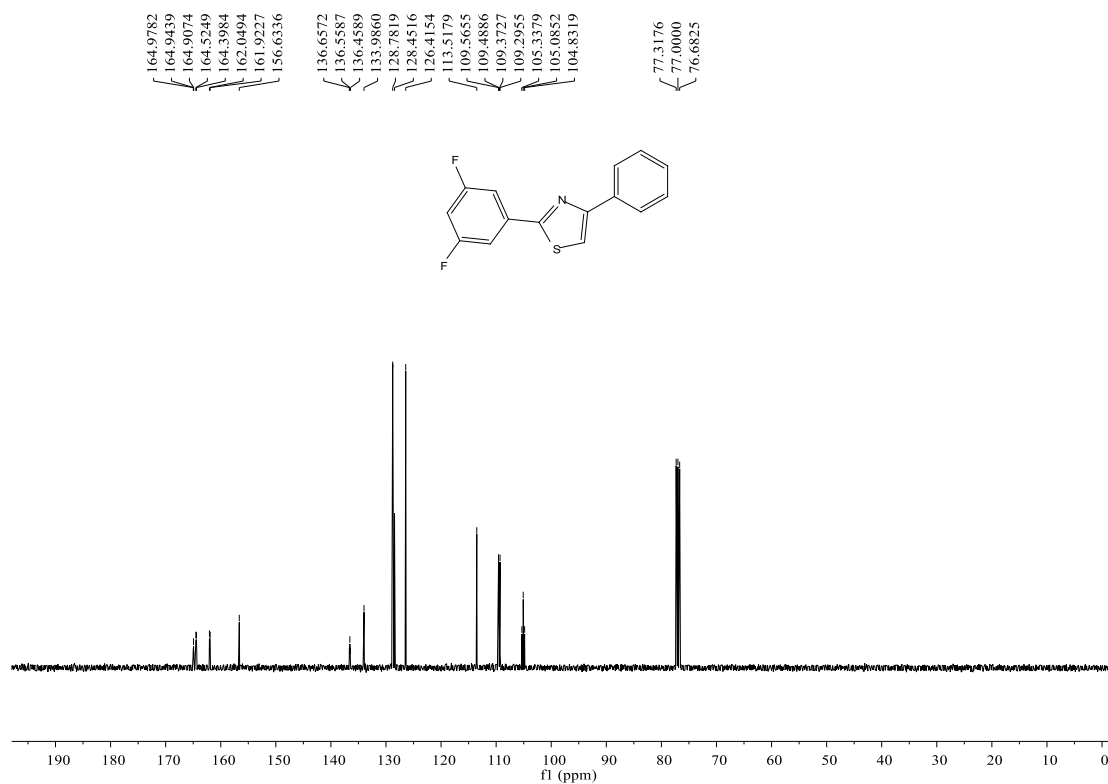

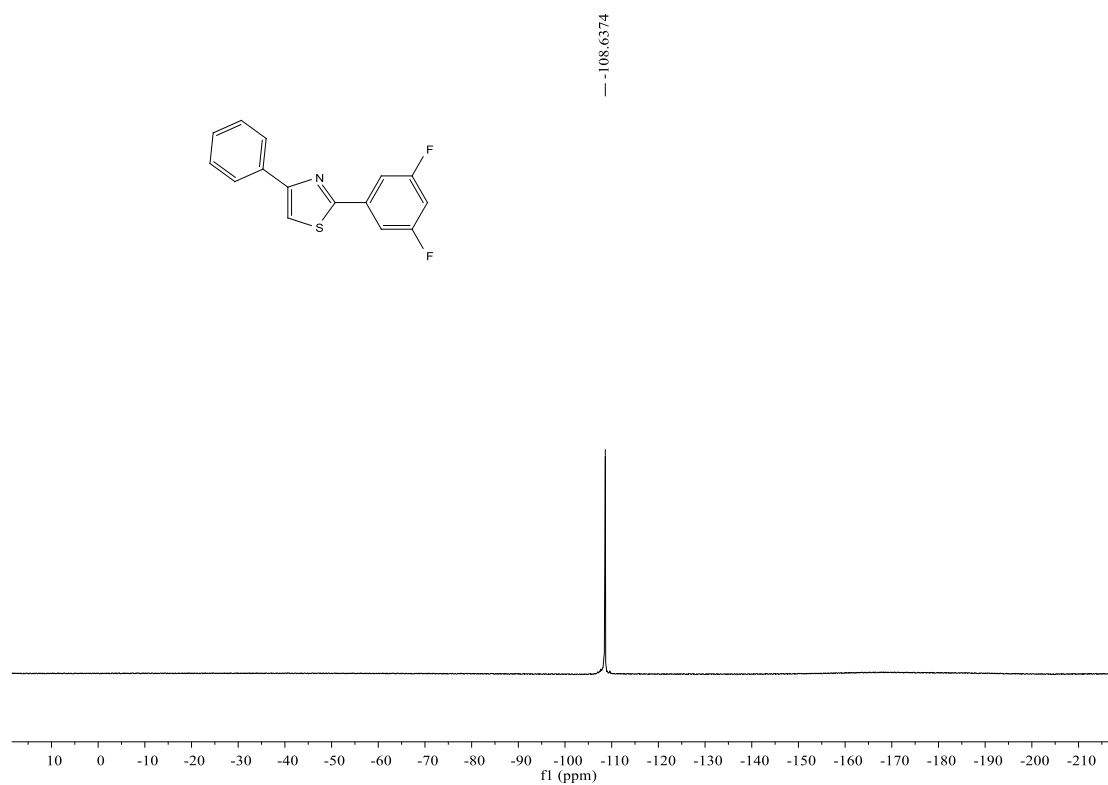

$^1\text{H}$  and  $^{13}\text{C}$  NMR NMR spectra of **3na**

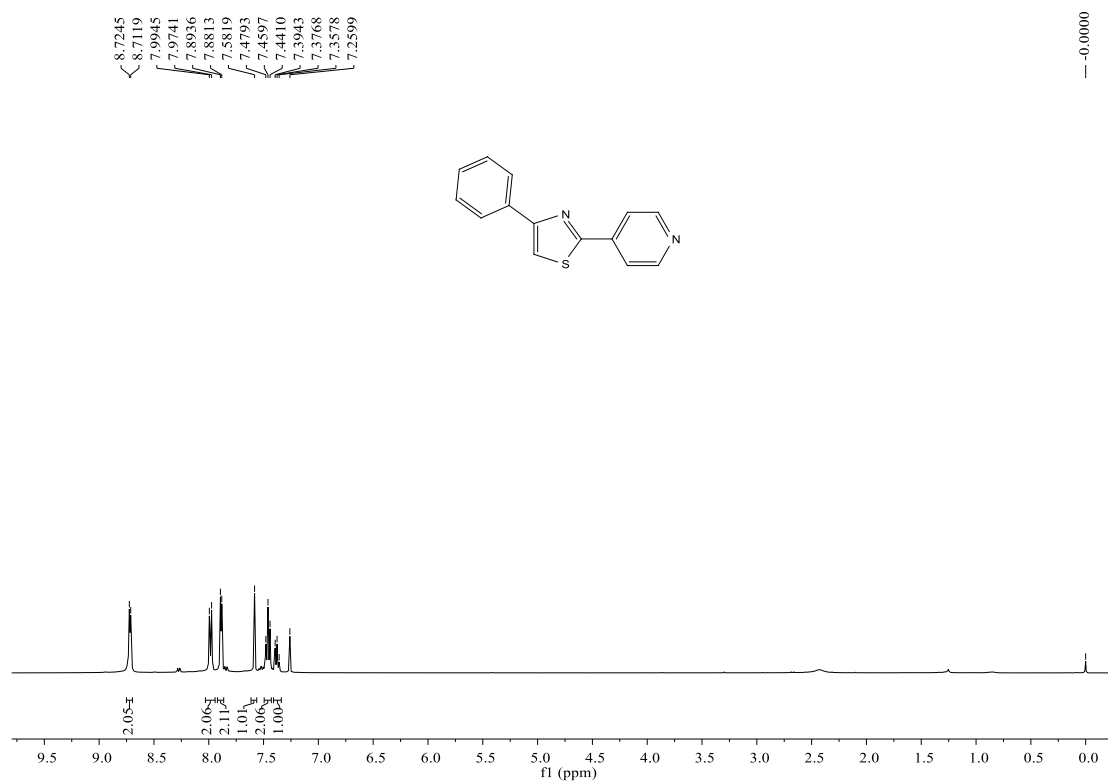

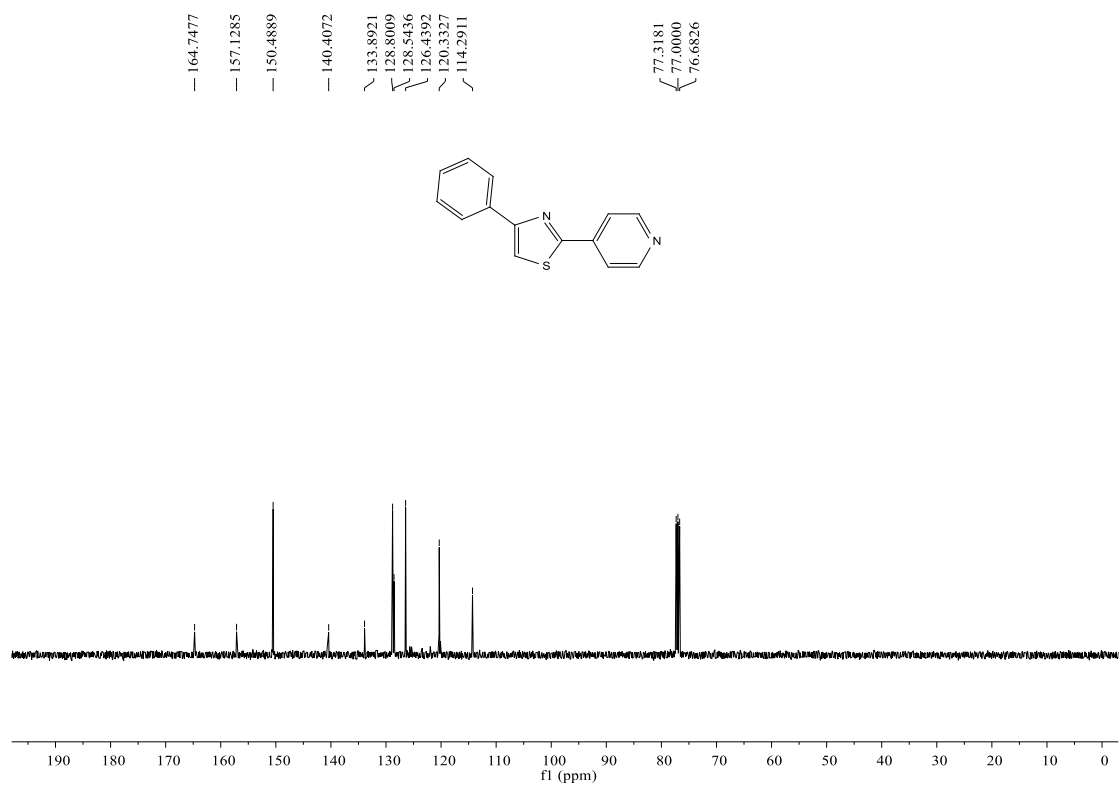

# <sup>1</sup>H and <sup>13</sup>C NMR spectra of 7

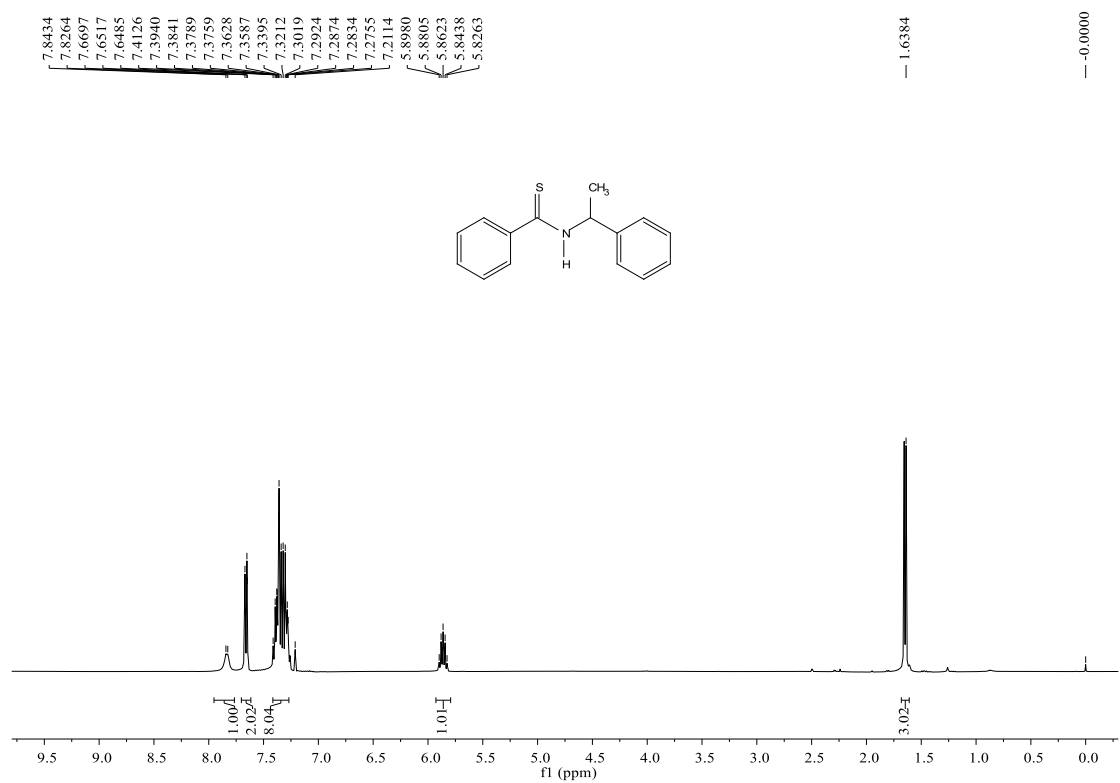



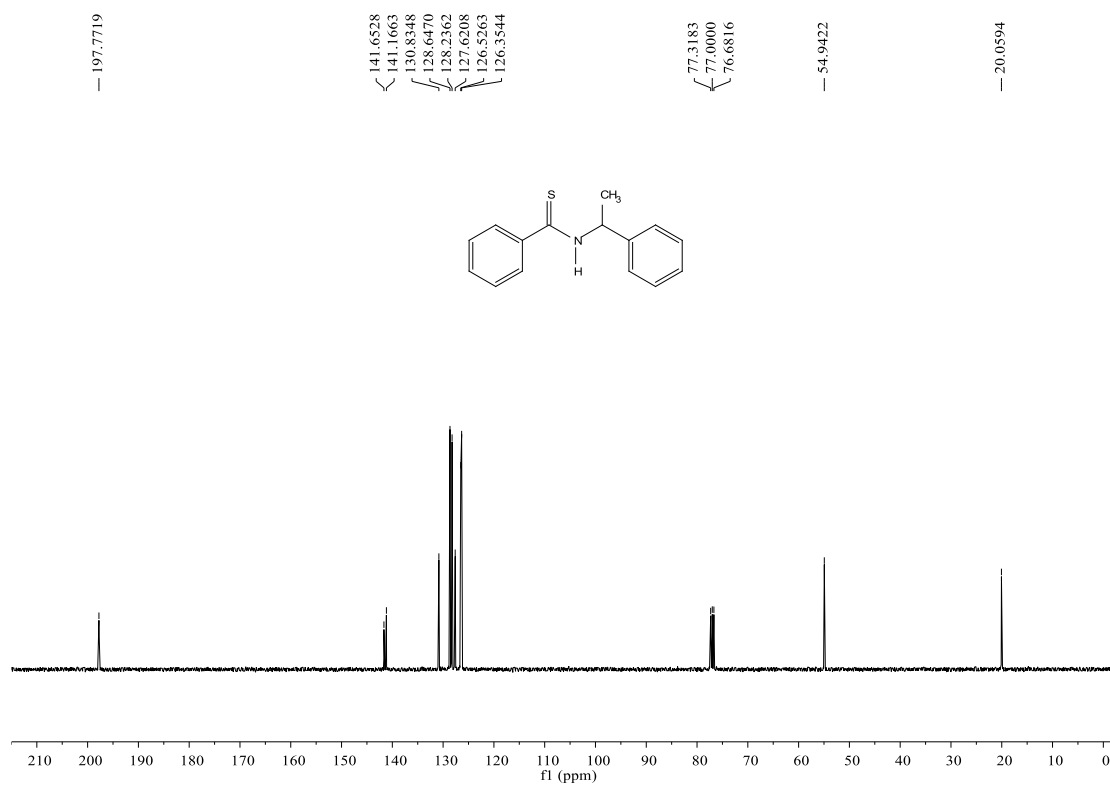

<sup>1</sup>H and <sup>13</sup>C NMR spectra of **8** (CD<sub>3</sub>OD-*d*<sub>4</sub>)

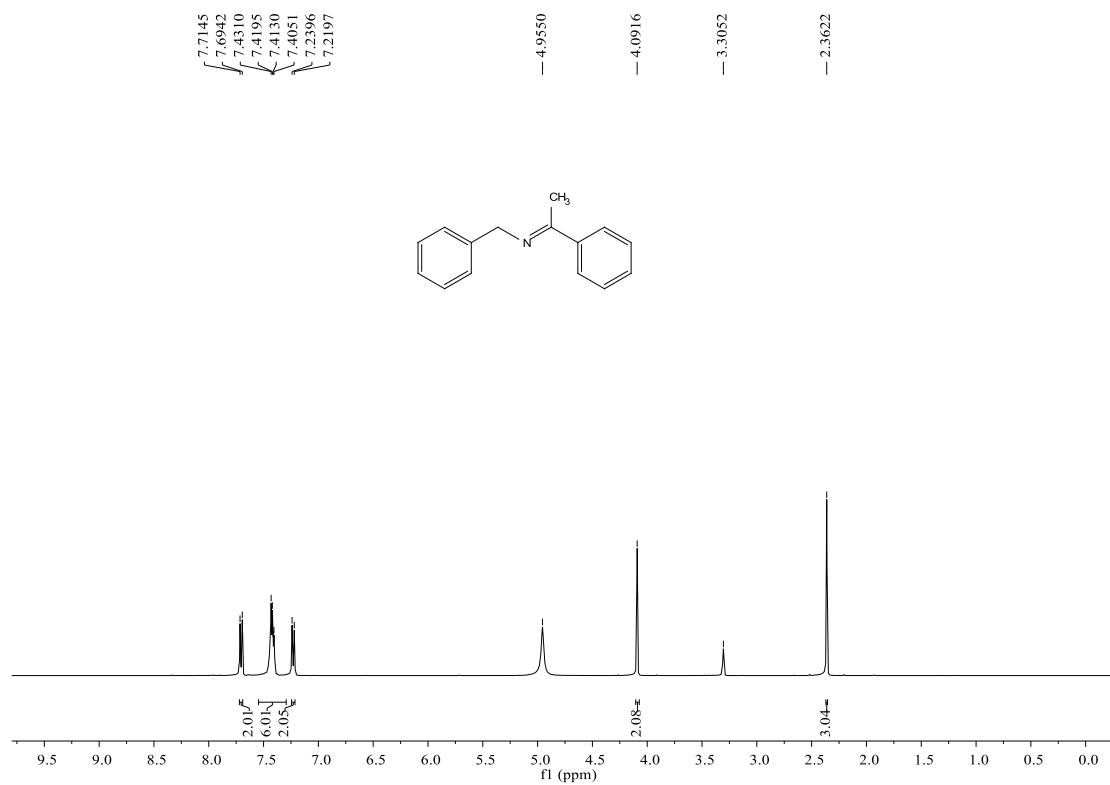

$^1\text{H}$  and  $^{13}\text{C}$  NMR spectra of **9**

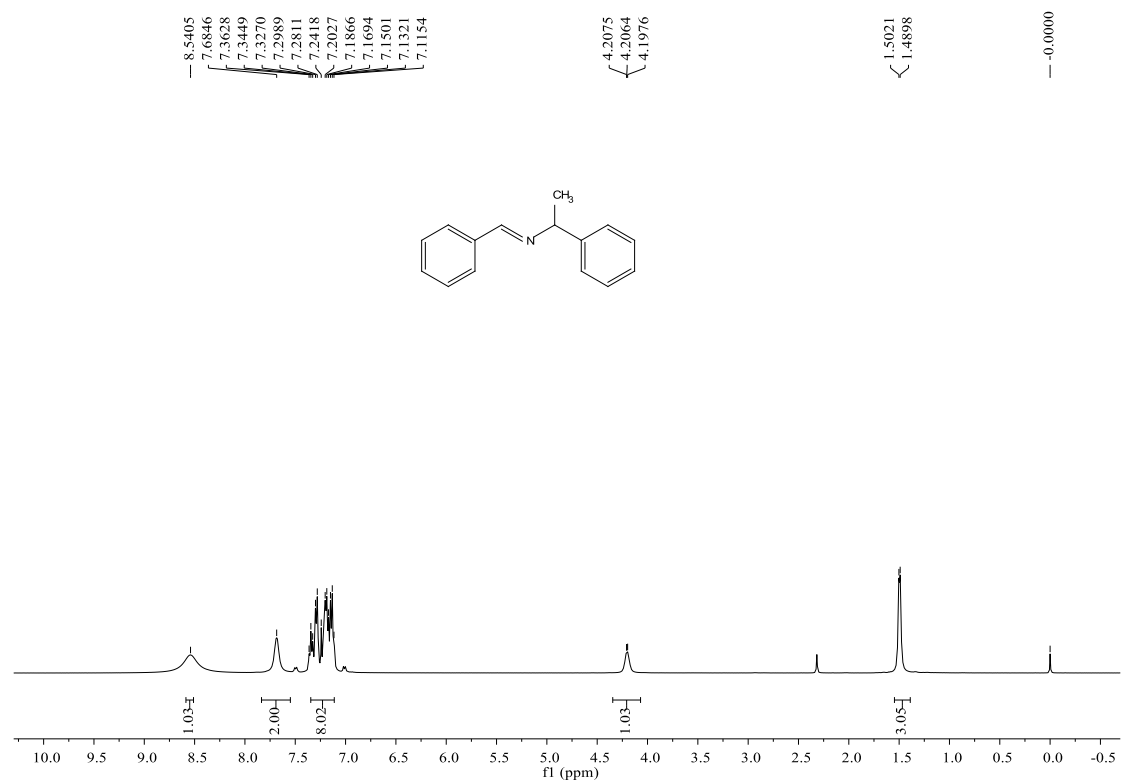

Supplement: c9ra09656f1.pdf [file c9ra09656f1.pdf]
